# Supplementary material for: Green and efficient synthesis of dibenzyl cyanamides and ureas with cyanamide as a block
Source: Royal Society of Chemistry journal article supplement (doi:10.1039/d4ra04286g), 2024-01-01

*Supporting information*

**Green and efficient synthesis dibenzyl cyanamides and ureas  
with cyanamide as a block**

Zhongjie Wang,<sup>a</sup> Yu He,<sup>a</sup> Fang Wang,<sup>a</sup> Yan Wang,<sup>a</sup> Hui Luo,<sup>a</sup> Jianglong Wu,<sup>b,\*</sup> and Jinhui Yang<sup>a\*</sup>

<sup>a</sup> *State Key Laboratory of High-efficiency Utilization of Coal and Green Chemical Engineering,  
College of Chemistry and Chemical Engineering, Ningxia University, Yinchuan 750021, China.*

<sup>b</sup> *School of Chemistry and Chemical Engineering, Ningxia Normal University, Guyuan 756000, China.*

\* *Corresponding authors. E-mail addresses: yang\_jh@nxu.edu.cn, 1548696132@qq.com.*

| <b>Table of contents</b>                                 | <b>Page</b> |
|----------------------------------------------------------|-------------|
| 1.General information                                    | S2          |
| 2.General procedure for synthesis of compound <b>3-5</b> | S2          |
| 3.Spectroscopic data for the products                    | S4          |
| 4.X-ray Spectra of <b>3m, 3s, 4b</b>                     | S14         |
| 5.References                                             | S23         |
| 6.NMR spectra                                            | S24         |

## 1. General information

$^1\text{H}$  NMR,  $^{13}\text{C}$  NMR and  $^{19}\text{F}$  NMR spectra were recorded on Bruker AV-400/500 MHz NMR spectrometers instrument using  $\text{CDCl}_3$  or  $\text{DMSO}-d_6$  as solvent and  $\text{Me}_4\text{Si}$  as internal standard. High-resolution mass spectra (HRMS) (ESI) were obtained with a Bruker Daltonics APEX II 47e and quadrupole Orbitrap Elite (Q-Exactive) mass spectrometer. Cyanamide was purchased from Aladdin Company (China, purity: 95%) and other commercially available reagents were purchased from Tansoole Chemicals, Macklin Biochemical Technology and used as received. Column chromatography was carried out on a flash chromatographic system using silica gel, petroleum ether (60-90 °C) and ethyl acetate as eluent. For thin layer chromatography (TLC), silica gel plates precoated with GF-254 were used.

## 2. General procedure for synthesis of compound 3, 4, 5:

### 2.1 The General Procedure for the Synthesis of 3

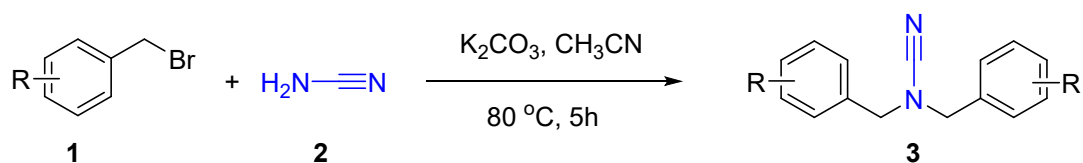

To a 25 mL quartz tube was charged with enzy bromide compounds **1** (0.44 mmol, 2.2 equiv.), cyanamide compound **2** (0.2 mmol),  $\text{K}_2\text{CO}_3$  (0.6 mmol, 3.0 equiv.) and  $\text{CH}_3\text{CN}$  (5 mL). Then the mixture was stirred for 5 h under air atmosphere at  $80\text{ }^\circ\text{C}$ . Perform TLC testing every hour until the reaction is complete. After completion, distilled under reduced pressure to remove acetonitrile. Add water (10 mL) and ethyl acetate (10 mL) to extract and separate the phases. The mixture was extracted with ethyl acetate (10 mL  $\times$  3). The combined organic layers were dried with by  $\text{Na}_2\text{SO}_4$ , and concentrated under reduced pressure. The residue was purified by chromatography on silica gel, eluting with the mixture of ethyl acetate/petroleum ether (1:20) to give *N,N*-dibenzylcyanamide compounds **3**.

### 2.2 The General Procedure for the Synthesis of 4

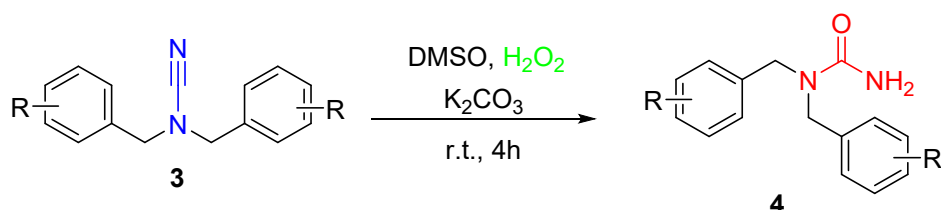

To a 25 mL quartz tube was charged with *N,N*-dibenzylcyanamide compounds **3** (0.2 mmol), hydrogen peroxide (0.24 mmol, 1.2 equiv., 30% aq.) and DMSO (3 mL). Then the mixture was stirred for 4 h under air atmosphere at room temperature. After completion, added water (10 mL) and ethyl acetate (10 mL) to extract and separate the phases. The mixture was extracted with ethyl acetate (10 mL × 3). The combined organic layers were dried with by Na<sub>2</sub>SO<sub>4</sub>, and concentrated under reduced pressure. The residue was purified by chromatography on silica gel, eluting with the mixture of ethyl acetate/petroleum ether (1:10) to give *N,N*-diphenylurea products **4**.

### 2.3 The General Procedure for the Synthesis of Derivatives **5a**

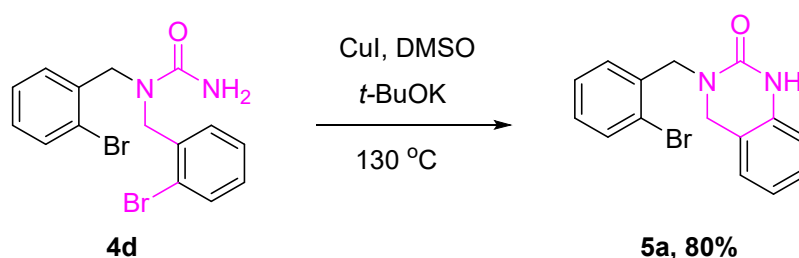

To a 25 mL quartz tube was charged with 1,1-bis(2-bromobenzyl)urea compounds **4d** (0.2 mmol), cuprous iodide (0.02 mmol, 0.1 equiv.), potassium *tert*-butoxide (0.6 mmol, 3.0 equiv.) and DMSO (2 mL). Then the mixture was stirred for 8 h under air atmosphere at 130 °C. After completion, added water (10 mL) and ethyl acetate (10 mL) to extract and separate the phases. The mixture was extracted with ethyl acetate (10 mL × 3). The combined organic layers were dried with by Na<sub>2</sub>SO<sub>4</sub>, and concentrated under reduced pressure. The residue was purified by chromatography on silica gel, eluting with the mixture of ethyl acetate/petroleum ether (1:5) to give product **5a**.

### 2.4 Gram-scale synthesis of **3a**, **4a**

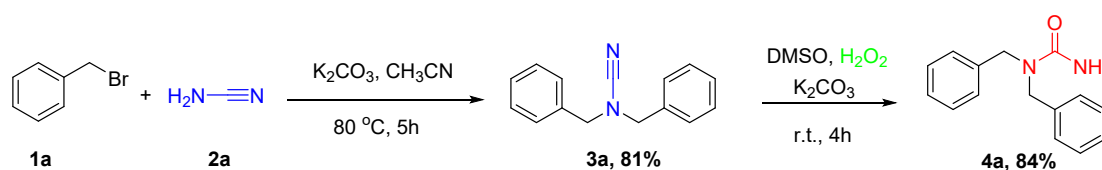

To a 100 mL flask was charged with (bromomethyl)benzene **1a** (22.0 mmol, 2.2 equiv., 3.74g), cyanamide **2** (10.0 mmol, 0.42g), K<sub>2</sub>CO<sub>3</sub> (30.0 mmol, 3.0 equiv., 4.17g) and MeCN (25mL). Then the mixture was stirred for 5 h under air atmosphere at 80 °C. Perform TLC testing every hour until the reaction is complete. After completion, distilled under reduced pressure to remove acetonitrile. Add water (25 mL) and ethyl acetate (25 mL) to extract and separate the phases. The mixture was extracted with ethyl acetate (25 mL × 3). The combined organic layers were dried with Na<sub>2</sub>SO<sub>4</sub>, and

concentrated under reduced pressure. The residue was purified by chromatography on silica gel, eluting with the mixture of ethyl acetate/petroleum ether (1:20) to give *N,N*-dibenzylcyanamide **3a** (1.80 g, 8.1 mmol, 81%). To a 100 mL flask was charged with *N,N*-dibenzylcyanamide **3a** (1.80g, 8.1 mmol), hydrogen peroxide (1.1g, 9.7 mmol, 1.2 equiv., 30% aq.) and DMSO (15 mL). Then the mixture was stirred for 4 h under air atmosphere at room temperature. After completion, added water (25 mL) and ethyl acetate (25 mL) to extract and separate the phases. The mixture was extracted with ethyl acetate (25 mL × 3). The combined organic layers were dried with Na<sub>2</sub>SO<sub>4</sub>, and concentrated under reduced pressure. The residue was purified by chromatography on silica gel, eluting with the mixture of ethyl acetate/petroleum ether (1:10) to give 1,1-dibenzylurea **4a** (1.63 g, 6.8 mmol, 84%).

### 3. Spectroscopic data for the products 3-5

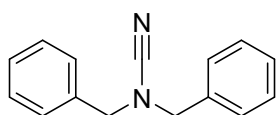

#### *N,N*-dibenzylcyanamide (**3a**)<sup>[1]</sup>

White solid; 33 mg, 75% yield; <sup>1</sup>H NMR (500 MHz, Chloroform - *d*) δ 7.41 - 7.35 (m, 6H), 7.32 - 7.31 (m, 4H), 4.11 (s, 4H); <sup>13</sup>C NMR (126 MHz, Chloroform - *d*) δ 134.4, 128.9, 128.6, 128.6, 118.2, 54.4; HRMS (ESI): *m/z* calcd for C<sub>15</sub>H<sub>14</sub>N<sub>2</sub> [M + H]<sup>+</sup>: 223.1230, found: 223.1226.

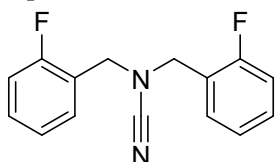

#### *N,N*-bis(2-fluorobenzyl)cyanamide (**3b**)

White solid; 40 mg, 77% yield; <sup>1</sup>H NMR (500 MHz, Chloroform - *d*) δ 7.38 - 7.32 (m, 4H), 7.16 (t, *J* = 7.5 Hz, 2H), 7.09 (t, *J* = 9.5 Hz, 2H), 4.23 (s, 4H); <sup>13</sup>C NMR (126 MHz, Chloroform - *d*) δ 161.2 (d, *J* = 249.5 Hz), 130.9 (d, *J* = 3.7 Hz), 130.7 (d, *J* = 8.8 Hz), 124.6 (d, *J* = 3.7 Hz), 121.7 (d, *J* = 13.9 Hz), 117.3, 115.8 (d, *J* = 21.4 Hz), 48.7 (d, *J* = 3.7 Hz); <sup>19</sup>F NMR (376 MHz, Chloroform - *d*) δ -117.3; HRMS (ESI): *m/z* calcd for C<sub>15</sub>H<sub>12</sub>F<sub>2</sub>N<sub>2</sub> [M + H]<sup>+</sup>: 259.1041, found: 259.1036.

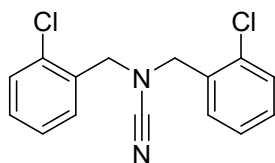

***N,N*-bis(2-chlorobenzyl)cyanamide (3c)**

White solid; 38 mg, 65% yield; <sup>1</sup>H NMR (500 MHz, Chloroform - *d*) δ 7.43 - 7.41 (m, 4H), 7.31 - 7.29 (m, 4H), 4.35 (s, 4H); <sup>13</sup>C NMR (126 MHz, Chloroform - *d*) δ 134.4, 132.2, 130.8, 130.2, 130.1, 127.4, 117.4, 52.7; HRMS (ESI): *m/z* calcd for C<sub>15</sub>H<sub>12</sub>Cl<sub>2</sub>N<sub>2</sub> [M + H]<sup>+</sup>: 291.0450, found: 291.0442.

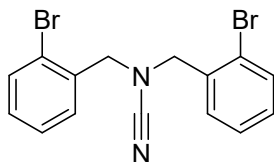

***N,N*-bis(2-bromobenzyl)cyanamide (3d)**

White solid; 56 mg, 74% yield; <sup>1</sup>H NMR (500 MHz, Chloroform - *d*) δ 7.60 (dd, *J* = 8.0, 1.5 Hz, 2H), 7.42 (dd, *J* = 7.5, 1.5 Hz, 2H), 7.36 - 7.33 (m, 2H), 7.23 - 7.20 (m, 2H), 4.35 (s, 4H); <sup>13</sup>C NMR (126 MHz, Chloroform - *d*) δ 133.8, 133.4, 130.8, 130.4, 128.0, 124.4, 117.3, 55.1; HRMS (ESI): *m/z* calcd for C<sub>15</sub>H<sub>12</sub>Br<sub>2</sub>N<sub>2</sub> [M - H]<sup>-</sup>: 376.9294, found: 376.9290.

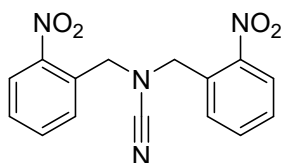

***N,N*-bis(2-nitrobenzyl)cyanamide (3e)**<sup>[1]</sup>

Brown solid; 39 mg, 62% yield; <sup>1</sup>H NMR (500 MHz, Chloroform - *d*) δ 7.35 - 7.31 (m, 4H), 7.28 - 7.27 (m, 2H), 7.20 - 7.18 (m, 2H), 4.10 (s, 4H); <sup>13</sup>C NMR (126 MHz, Chloroform - *d*) δ 136.2, 135.0, 130.4, 129.1, 128.7, 126.8, 117.6, 54.2; HRMS (ESI): *m/z* calcd for C<sub>15</sub>H<sub>12</sub>N<sub>4</sub>O<sub>4</sub> [M + H]<sup>+</sup>: 313.0931, found: 313.0930.

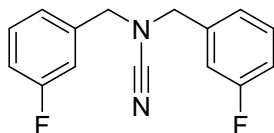

***N,N*-bis(3-fluorobenzyl)cyanamide (3f)**

White solid; 43 mg, 83% yield; <sup>1</sup>H NMR (500 MHz, Chloroform - *d*) δ 7.39 - 7.34 (m, 2H), 7.10 - 7.00 (m, 6H), 4.13 (s, 4H); <sup>13</sup>C NMR (126 MHz, Chloroform - *d*) δ 163.1 (d, *J* = 248.2 Hz), 136.7 (d, *J* = 7.6 Hz), 130.8 (d, *J* = 7.6 Hz), 124.3 (d, *J* = 2.5 Hz), 117.7 (d, *J* = 20.2 Hz), 115.6 (d, *J* = 22.7 Hz), 54.2 (d, *J* = 2.5 Hz); <sup>19</sup>F NMR (376 MHz, Chloroform - *d*) δ -111.7; HRMS (ESI): *m/z* calcd for C<sub>15</sub>H<sub>12</sub>F<sub>2</sub>N<sub>2</sub> [M + H]<sup>+</sup>: 259.1041, found: 259.1043.

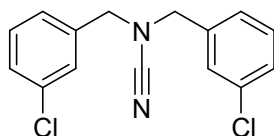

***N,N*-bis(3-chlorobenzyl)cyanamide (3g)**

White solid; 42 mg, 72% yield;  $^1\text{H NMR}$  (500 MHz, Chloroform - *d*)  $\delta$  8.10 (d,  $J = 8.5$  Hz, 2H), 7.72 (t,  $J = 7.5$  Hz, 2H), 7.65 (d,  $J = 7.5$  Hz, 2H), 7.56 (t,  $J = 8.0$  Hz, 2H), 4.69 (s, 4H);  $^{13}\text{C NMR}$  (126 MHz, Chloroform - *d*)  $\delta$  148.4, 134.3, 130.9, 130.0, 129.9, 125.8, 116.7, 53.3; **HRMS (ESI)**:  $m/z$  calcd for  $\text{C}_{15}\text{H}_{12}\text{Cl}_2\text{N}_2$   $[\text{M} + \text{H}]^+$ : 291.0450, found: 291.0452.

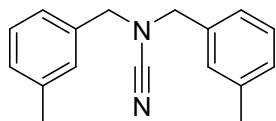

### *N,N*-bis(3-methylbenzyl)cyanamide (3h) <sup>[1]</sup>

White solid; 42 mg, 84% yield;  $^1\text{H NMR}$  (500 MHz, Chloroform - *d*)  $\delta$  7.29 (t,  $J = 7.5$  Hz, 2H), 7.18 (d,  $J = 8.0$  Hz, 2H), 7.13 - 7.10 (m, 4H), 4.09 (s, 4H), 2.39 (s, 6H);  $^{13}\text{C NMR}$  (126 MHz, Chloroform - *d*)  $\delta$  138.7, 134.4, 129.4, 129.4, 128.8, 125.8, 118.5, 54.3, 21.4; **HRMS (ESI)**:  $m/z$  calcd for  $\text{C}_{17}\text{H}_{18}\text{N}_2$   $[\text{M} + \text{H}]^+$ : 251.1543, found: 251.1540.

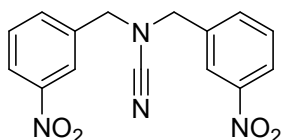

### *N,N*-bis(3-nitrobenzyl)cyanamide (3i)

Brown solid; 32 mg, 52% yield;  $^1\text{H NMR}$  (500 MHz, Chloroform - *d*)  $\delta$  8.23 - 8.21 (m, 2H), 8.16 - 8.15 (m, 2H), 7.71 (d,  $J = 7.5$  Hz, 2H), 7.61 (t,  $J = 8.0$  Hz, 2H), 4.32 (s, 4H);  $^{13}\text{C NMR}$  (126 MHz, Chloroform - *d*)  $\delta$  148.7, 136.2, 134.6, 130.5, 124.1, 123.6, 116.8, 54.6; **HRMS (ESI)**:  $m/z$  calcd for  $\text{C}_{15}\text{H}_{12}\text{N}_4\text{O}_4$   $[\text{M} + \text{H}]^+$ : 313.0931, found: 313.0932.

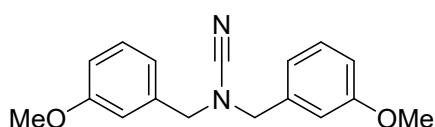

### *N,N*-bis(3-methoxybenzyl)cyanamide (3j)

White solid; 44 mg, 78% yield;  $^1\text{H NMR}$  (500 MHz, Chloroform - *d*)  $\delta$  7.29 (t,  $J = 8.0$  Hz, 2H), 6.89 - 6.87 (m, 4H), 6.84 - 6.83 (m, 2H), 4.08 (s, 4H), 3.79 (s, 6H);  $^{13}\text{C NMR}$  (126 MHz, Chloroform - *d*)  $\delta$  160.0, 135.9, 129.9, 120.8, 118.3, 114.1, 114.1, 55.2, 54.3; **HRMS (ESI)**:  $m/z$  calcd for  $\text{C}_{17}\text{H}_{18}\text{N}_2\text{O}_2$   $[\text{M} + \text{H}]^+$ : 283.1441, found: 283.1433.

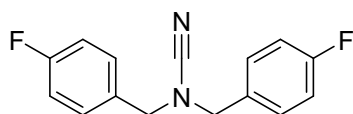

### *N,N*-bis(4-fluorobenzyl)cyanamide (3k) <sup>[1]</sup>

White solid; 44 mg, 85% yield;  $^1\text{H NMR}$  (500 MHz, Chloroform - *d*)  $\delta$  7.29 - 7.25

(m, 4H), 7.09 - 7.04 (m, 4H), 4.08 (s, 4H);  $^{13}\text{C}$  NMR (126 MHz, Chloroform - *d*)  $\delta$  162.9 (d,  $J = 248.2$  Hz), 130.5 (d,  $J = 8.8$  Hz), 130.1 (d,  $J = 3.8$  Hz), 117.8, 116.0 (d,  $J = 21.4$  Hz), 53.8;  $^{19}\text{F}$  NMR (376 MHz, Chloroform - *d*)  $\delta$  -112.7; HRMS (ESI):  $m/z$  calcd for  $\text{C}_{15}\text{H}_{12}\text{F}_2\text{N}_2$   $[\text{M} + \text{H}]^+$ : 259.1041, found: 259.1033.

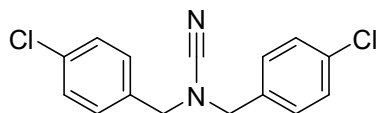

***N,N*-bis(4-chlorobenzyl)cyanamide (3l)** <sup>[1]</sup>

White solid; 50 mg, 86% yield;  $^1\text{H}$  NMR (500 MHz, Chloroform - *d*)  $\delta$  7.73 - 7.71 (m, 4H), 7.04 - 7.02 (m, 4H), 4.04 (s, 4H);  $^{13}\text{C}$  NMR (126 MHz, Chloroform - *d*)  $\delta$  138.3, 133.9, 130.6, 117.8, 94.7, 54.1; HRMS (ESI):  $m/z$  calcd for  $\text{C}_{15}\text{H}_{12}\text{Cl}_2\text{N}_2$   $[\text{M} + \text{H}]^+$ : 291.0450, found: 291.0440.

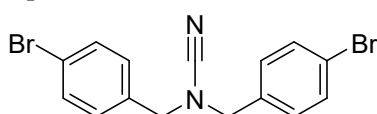

***N,N*-bis(4-bromobenzyl)cyanamide (3m)** <sup>[1]</sup>

White solid; 63 mg, 83% yield;  $^1\text{H}$  NMR (500 MHz, Chloroform - *d*)  $\delta$  7.51 (d,  $J = 8.0$  Hz, 4H), 7.16 (d,  $J = 8.0$  Hz, 4H), 4.06 (s, 4H);  $^{13}\text{C}$  NMR (126 MHz, Chloroform - *d*)  $\delta$  133.2, 132.3, 130.4, 123.0, 117.7, 54.0; HRMS (ESI):  $m/z$  calcd for  $\text{C}_{15}\text{H}_{12}\text{Br}_2\text{N}_2$   $[\text{M} - \text{H}]^-$ : 376.9294, found: 376.9292.

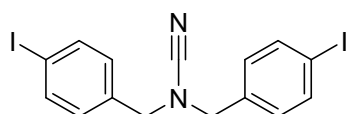

***N,N*-bis(4-iodobenzyl)cyanamide (3n)**

White solid; 59 mg, 62% yield;  $^1\text{H}$  NMR (500 MHz, Chloroform - *d*)  $\delta$  7.33 (d,  $J = 8.0$  Hz, 4H), 7.21 (d,  $J = 8.5$  Hz, 4H), 4.05 (s, 4H);  $^{13}\text{C}$  NMR (126 MHz, Chloroform - *d*)  $\delta$  134.7, 132.7, 130.0, 129.2, 117.6, 53.8; HRMS (ESI):  $m/z$  calcd for  $\text{C}_{15}\text{H}_{12}\text{I}_2\text{N}_2$   $[\text{M} - \text{H}]^+$ : 472.9017, found: 472.9013.

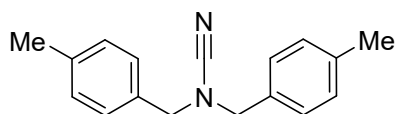

***N,N*-bis(4-methylbenzyl)cyanamide (3o)** <sup>[1]</sup>

White solid; 40 mg, 80% yield;  $^1\text{H}$  NMR (500 MHz, Chloroform - *d*)  $\delta$  7.20 (s, 8H), 4.06 (s, 4H), 2.37 (s, 6H);  $^{13}\text{C}$  NMR (126 MHz, Chloroform - *d*)  $\delta$  138.6, 131.5, 129.7, 128.8, 118.6, 54.1, 21.3; HRMS (ESI):  $m/z$  calcd for  $\text{C}_{17}\text{H}_{18}\text{N}_2$   $[\text{M} + \text{H}]^+$ : 251.1543, found: 251.1540.

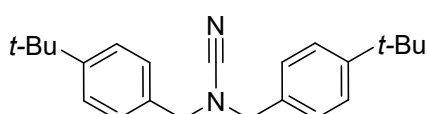

***N,N*-bis(4-(*tert*-butyl)benzyl)cyanamide (3p)**

White solid; 58 mg, 87% yield;  $^1\text{H NMR}$  (500 MHz, Chloroform - *d*)  $\delta$  7.41 - 7.38 (m, 4H), 7.25 - 7.23 (m, 4H), 4.08 (s, 4H), 1.33 (s, 18H);  $^{13}\text{C NMR}$  (126 MHz, Chloroform - *d*)  $\delta$  151.7, 131.6, 128.5, 125.9, 118.6, 54.0, 34.7, 31.4; HRMS (ESI):  $m/z$  calcd for  $\text{C}_{23}\text{H}_{30}\text{N}_2$   $[\text{M} + \text{H}]^+$ : 335.2482, found: 335.2474.

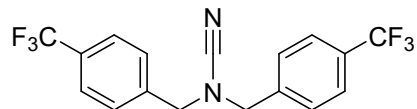

***N,N*-bis(4-(trifluoromethyl)benzyl)cyanamide (3q)**

White solid; 59 mg, 82% yield;  $^1\text{H NMR}$  (500 MHz, Chloroform - *d*)  $\delta$  7.65 (d,  $J = 8.0$  Hz, 4H), 7.43 (d,  $J = 8.0$  Hz, 4H), 4.21 (s, 4H);  $^{13}\text{C NMR}$  (126 MHz, Chloroform - *d*)  $\delta$  138.2, 131.2 (q,  $J = 32.8$  Hz), 129.0, 126.1 (q,  $J = 3.8$  Hz), 122.7 (q,  $J = 272.6$  Hz), 117.5, 54.4;  $^{19}\text{F NMR}$  (376 MHz, Chloroform - *d*)  $\delta$  -62.8; HRMS (ESI):  $m/z$  calcd for  $\text{C}_{17}\text{H}_{12}\text{F}_6\text{N}_2$   $[\text{M} + \text{H}]^+$ : 359.0977, found: 359.0980.

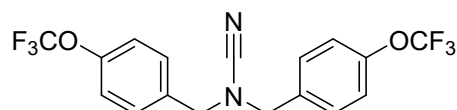

***N,N*-bis(4-(trifluoromethoxy)benzyl)cyanamide (3r)**

White solid; 63 mg, 81% yield;  $^1\text{H NMR}$  (500 MHz, Chloroform - *d*)  $\delta$  7.35 - 7.32 (m, 4H), 7.23 (d,  $J = 8.0$  Hz, 4H), 4.14 (s, 4H);  $^{13}\text{C NMR}$  (126 MHz, Chloroform - *d*)  $\delta$  149.5 (q,  $J = 2.5$  Hz), 132.9, 130.1, 121.4, 120.4 (q,  $J = 258.3$  Hz), 117.6, 53.9;  $^{19}\text{F NMR}$  (376 MHz, Chloroform - *d*)  $\delta$  -57.9; HRMS (ESI):  $m/z$  calcd for  $\text{C}_{17}\text{H}_{12}\text{F}_6\text{N}_2\text{O}_2$   $[\text{M} + \text{H}]^+$ : 391.0876, found: 391.0865.

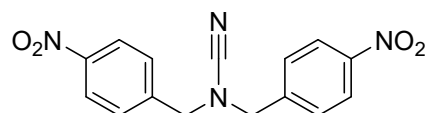

***N,N*-bis(4-nitrobenzyl)cyanamide (3s)**

Brown solid; 50 mg, 76% yield;  $^1\text{H NMR}$  (500 MHz, Chloroform - *d*)  $\delta$  8.26 - 8.24 (m, 4H), 7.52 (d,  $J = 8.5$  Hz, 4H), 4.29 (s, 4H);  $^{13}\text{C NMR}$  (126 MHz, Chloroform - *d*)  $\delta$  148.4, 141.0, 129.5, 124.4, 116.8, 54.4; HRMS (ESI):  $m/z$  calcd for  $\text{C}_{15}\text{H}_{12}\text{N}_4\text{O}_4$   $[\text{M} + \text{H}]^+$ : 313.0931, found: 313.0922.

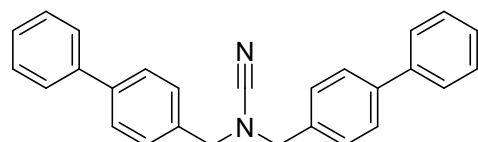

***N,N*-bis([1,1'-biphenyl]-4-ylmethyl)cyanamide (3t)**

White solid; 62 mg, 83% yield;  $^1\text{H NMR}$  (500 MHz, Chloroform - *d*)  $\delta$  7.66 - 7.62 (m, 8H), 7.50 - 7.47 (m, 4H), 7.44 - 7.38 (m, 6H), 4.22 (s, 4H);  $^{13}\text{C NMR}$  (126 MHz, Chloroform - *d*)  $\delta$  141.7, 140.5, 133.4, 129.2, 128.9, 127.7, 127.7, 127.2, 118.4, 54.2; HRMS (ESI):  $m/z$  calcd for  $\text{C}_{27}\text{H}_{22}\text{N}_2$   $[\text{M} - \text{H}]^-$ : 373.1710, found: 373.1708.



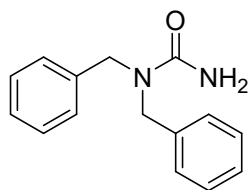

### 1,1-Dibenzylurea (4a)<sup>[2]</sup>

White solid; 41 mg, 85% yield; <sup>1</sup>H NMR (500 MHz, Chloroform - *d*) δ 7.31 - 7.28 (m, 4H), 7.25 - 7.19 (m, 6H), 5.07 (s, 2H), 4.23 (s, 4H); <sup>13</sup>C NMR (126 MHz, Chloroform - *d*) δ 159.7, 137.3, 128.8, 127.5, 127.2, 50.2; HRMS (ESI): *m/z* calcd for C<sub>15</sub>H<sub>16</sub>N<sub>2</sub>O [M + H]<sup>+</sup>: 241.1335, found: 241.1329.

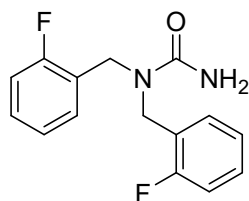

### 1,1-Bis(2-fluorobenzyl)urea (4b)

White solid; 40 mg, 72% yield; <sup>1</sup>H NMR (500 MHz, Chloroform - *d*) δ 7.32 - 7.29 (m, 2H), 7.25 - 7.20 (m, 2H), 7.10 - 7.07 (m, 2H), 7.02 - 6.98 (m, 2H), 5.17 (s, 2H), 4.52 (s, 4H); <sup>13</sup>C NMR (126 MHz, Chloroform - *d*) δ 160.8 (d, *J* = 245.7 Hz), 159.5, 129.3 (d, *J* = 3.8 Hz), 129.2 (d, *J* = 8.8 Hz), 124.5 (d, *J* = 3.8 Hz), 124.2 (d, *J* = 15.1 Hz), 115.4 (d, *J* = 21.4 Hz), 44.3 (d, *J* = 5.0 Hz); <sup>19</sup>F NMR (376 MHz, Chloroform - *d*) δ -118.4; HRMS (ESI): *m/z* calcd for C<sub>15</sub>H<sub>14</sub>F<sub>2</sub>N<sub>2</sub>O [M + H]<sup>+</sup>: 277.1147, found: 277.1141.

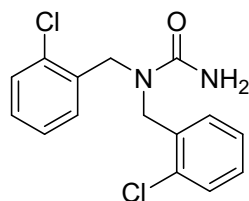

### 1,1-Bis(2-chlorobenzyl)urea (4c)

White solid; 48 mg, 78% yield; <sup>1</sup>H NMR (500 MHz, Chloroform - *d*) δ 7.36 - 7.33 (m, 4H), 7.29 - 7.27 (m, 2H), 7.24 - 7.20 (m, 2H), 4.79 (s, 2H), 4.61 (s, 4H); <sup>13</sup>C NMR (126 MHz, Chloroform - *d*) δ 159.3, 134.4, 133.2, 129.8, 128.9, 128.1, 127.4, 48.8; HRMS (ESI): *m/z* calcd for C<sub>15</sub>H<sub>14</sub>Cl<sub>2</sub>N<sub>2</sub>O [M + H]<sup>+</sup>: 309.0556, found: 309.0547.

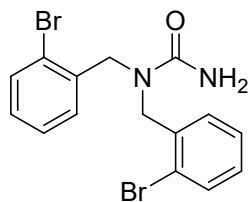

### 1,1-Bis(2-bromobenzyl)urea (4d)

White solid; 59 mg, 75% yield; <sup>1</sup>H NMR (500 MHz, Chloroform - *d*) δ 7.50 (d, *J* = 7.5 Hz, 2H), 7.34 (d, *J* = 4.5 Hz, 4H), 7.17 - 7.15 (m, 2H), 4.60 (s, 4H), 4.54 (s, 2H);

$^{13}\text{C}$  NMR (126 MHz, Chloroform - *d*)  $\delta$  158.9, 135.7, 133.1, 129.1, 128.0, 127.9, 123.1, 51.2; HRMS (ESI):  $m/z$  calcd for  $\text{C}_{15}\text{H}_{14}\text{Br}_2\text{N}_2\text{O}$   $[\text{M} + \text{H}]^+$ : 396.9546, found: 396.9540.

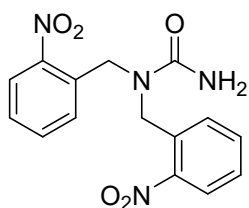

#### 1,1-Bis(2-nitrobenzyl)urea (4e)

Brown solid; 43 mg, 65% yield;  $^1\text{H}$  NMR (500 MHz, Chloroform - *d*)  $\delta$  8.09 (dd,  $J = 8.5, 1.5$  Hz, 2H), 7.72 - 7.69 (m, 2H), 7.55 (d,  $J = 8.0$  Hz, 2H), 7.50 - 7.47 (m, 2H), 4.92 (s, 4H), 4.77 (s, 2H);  $^{13}\text{C}$  NMR (126 MHz, Chloroform - *d*)  $\delta$  159.0, 148.3, 134.5, 132.8, 128.7, 128.2, 125.8, 49.1; HRMS (ESI):  $m/z$  calcd for  $\text{C}_{15}\text{H}_{14}\text{N}_4\text{O}_5$   $[\text{M} + \text{H}]^+$ : 331.1037, found: 331.1041.

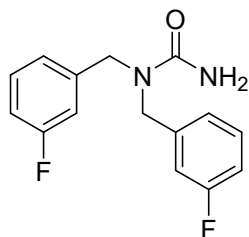

#### 1,1-Bis(3-fluorobenzyl)urea (4f)

White solid; 47 mg, 85% yield;  $^1\text{H}$  NMR (500 MHz, Chloroform - *d*)  $\delta$  7.30 - 7.25 (m, 2H), 6.99 (d,  $J = 2.0$  Hz, 2H), 6.98 - 6.92 (m, 4H), 5.17 (s, 2H), 4.44 (s, 4H);  $^{13}\text{C}$  NMR (126 MHz, Chloroform - *d*)  $\delta$  163.2 (d,  $J = 247.0$  Hz), 159.5, 139.9 (d,  $J = 6.3$  Hz), 130.4 (d,  $J = 8.8$  Hz), 122.8 (d,  $J = 3.8$  Hz), 114.5 (d,  $J = 20.2$  Hz), 114.1 (d,  $J = 21.4$  Hz), 50.0 (d,  $J = 1.3$  Hz);  $^{19}\text{F}$  NMR (376 MHz, Chloroform - *d*)  $\delta$  -122.3; HRMS (ESI):  $m/z$  calcd for  $\text{C}_{15}\text{H}_{14}\text{F}_2\text{N}_2\text{O}$   $[\text{M} + \text{H}]^+$ : 277.1147, found: 277.1141.

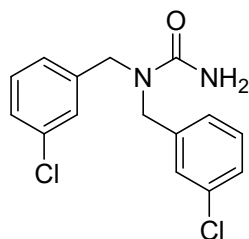

#### 1,1-Bis(3-chlorobenzyl)urea (4g)

White solid; 53 mg, 86% yield;  $^1\text{H}$  NMR (500 MHz, Chloroform - *d*)  $\delta$  7.24-7.22 (m, 4H), 7.19 (d,  $J = 2.5$  Hz, 2H), 7.10 - 7.08 (m, 2H), 5.09 (s, 2H), 4.41 (s, 4H);  $^{13}\text{C}$  NMR (126 MHz, Chloroform - *d*)  $\delta$  159.4, 139.3, 134.9, 130.2, 127.9, 127.3, 125.4, 50.0; HRMS (ESI):  $m/z$  calcd for  $\text{C}_{15}\text{H}_{14}\text{Cl}_2\text{N}_2\text{O}$   $[\text{M} + \text{H}]^+$ : 309.0556, found: 309.0550.

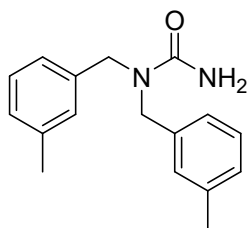

#### 1,1-Bis(3-methylbenzyl)urea (4h)

White solid; 49 mg, 91% yield;  $^1\text{H NMR}$  (500 MHz, Chloroform - *d*)  $\delta$  7.22 (t,  $J$  = 7.5 Hz, 2H), 7.09 (d,  $J$  = 8.0 Hz, 2H), 7.06 - 7.03 (m, 4H), 4.86 (s, 2H), 4.45 (s, 4H), 2.34 (s, 6H);  $^{13}\text{C NMR}$  (126 MHz, Chloroform - *d*)  $\delta$  159.7, 138.6, 137.4, 128.7, 128.3, 127.9, 124.4, 50.4, 21.5; HRMS (ESI):  $m/z$  calcd for  $\text{C}_{17}\text{H}_{20}\text{N}_2\text{O}$   $[\text{M} + \text{H}]^+$ : 269.1648, found: 269.1643.

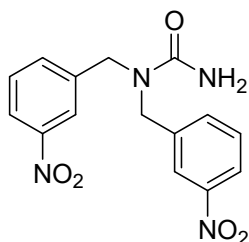

#### 1,1-Bis(3-nitrobenzyl)urea (4i)

Brown solid; 45 mg, 68% yield;  $^1\text{H NMR}$  (500 MHz, DMSO -  $d_6$ )  $\delta$  8.09 - 8.06 (m, 2H), 8.03 - 8.03 (m, 2H), 7.67 (d,  $J$  = 7.5 Hz, 2H), 7.59 (t,  $J$  = 8.0 Hz, 2H), 6.35 (s, 2H), 4.61 (s, 4H);  $^{13}\text{C NMR}$  (126 MHz, DMSO -  $d_6$ )  $\delta$  158.5, 147.7, 141.2, 134.1, 129.8, 121.9, 121.8, 49.2; HRMS (ESI):  $m/z$  calcd for  $\text{C}_{15}\text{H}_{14}\text{N}_4\text{O}_5$   $[\text{M} + \text{H}]^+$ : 331.1037, found: 331.1030.

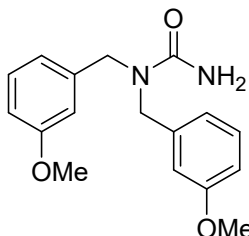

#### 1,1-Bis(3-methoxybenzyl)urea (4j)

White solid; 53 mg, 88% yield;  $^1\text{H NMR}$  (500 MHz, Chloroform - *d*)  $\delta$  7.24 (t,  $J$  = 8.0 Hz, 2H), 6.83 - 6.77 (m, 6H), 4.76 (s, 2H), 4.46 (s, 4H), 3.76 (s, 6H);  $^{13}\text{C NMR}$  (126 MHz, Chloroform - *d*)  $\delta$  160.2, 159.6, 139.1, 130.0, 119.6, 113.2, 112.9, 55.3, 50.6; HRMS (ESI):  $m/z$  calcd for  $\text{C}_{17}\text{H}_{20}\text{N}_2\text{O}_3$   $[\text{M} + \text{H}]^+$ : 301.1547, found: 301.1539.

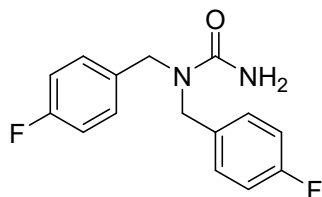

#### 1,1-Bis(4-fluorobenzyl)urea (4k)

White solid; 45 mg, 81% yield;  $^1\text{H NMR}$  (500 MHz, Chloroform - *d*)  $\delta$  7.18 - 7.16 (m, 4H), 7.01 - 6.96 (m, 4H), 5.05 (s, 2H), 4.39 (s, 4H);  $^{13}\text{C NMR}$  (126 MHz,

**Chloroform - *d***  $\delta$  162.3 (d,  $J = 247.0$  Hz), 159.5, 133.0, 132.9, 129.0, 128.9, 115.8, 115.7, 49.7;  **$^{19}\text{F}$  NMR (376 MHz, Chloroform - *d*)**  $\delta$  -114.8; **HRMS (ESI):**  $m/z$  calcd for  $\text{C}_{15}\text{H}_{14}\text{F}_2\text{N}_2\text{O}$   $[\text{M} + \text{H}]^+$ : 277.1147, found: 277.1140.

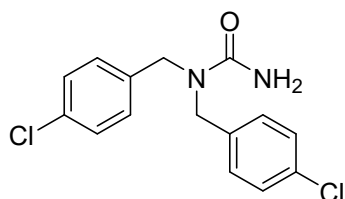

**1,1-bis(4-chlorobenzyl)urea (4l)**

White solid; 54 mg, 87% yield;  **$^1\text{H}$  NMR (500 MHz, Chloroform - *d*)**  $\delta$  7.33 - 7.30 (m, 4H), 7.18 - 7.16 (m, 4H), 4.59 (s, 2H), 4.43 (s, 4H);  **$^{13}\text{C}$  NMR (126 MHz, Chloroform - *d*)**  $\delta$  159.1, 135.6, 133.7, 129.2, 128.7, 50.0; **HRMS (ESI):**  $m/z$  calcd for  $\text{C}_{15}\text{H}_{14}\text{Cl}_2\text{N}_2\text{O}$   $[\text{M} + \text{H}]^+$ : 309.0556, found: 309.0548.

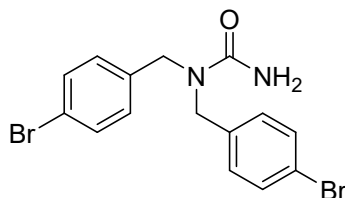

**1,1-Bis(4-bromobenzyl)urea (4m)**

White solid; 70 mg, 88% yield;  **$^1\text{H}$  NMR (500 MHz, Chloroform - *d*)**  $\delta$  7.46 - 7.43 (m, 4H), 7.09 (d,  $J = 8.5$  Hz, 4H), 4.89 (s, 2H), 4.38 (s, 4H);  **$^{13}\text{C}$  NMR (126 MHz, Chloroform - *d*)**  $\delta$  159.3, 136.1, 132.2, 129.0, 121.7, 49.9; **HRMS (ESI):**  $m/z$  calcd for  $\text{C}_{15}\text{H}_{14}\text{Br}_2\text{N}_2\text{O}$   $[\text{M} + \text{H}]^+$ : 396.9546, found: 396.9538.

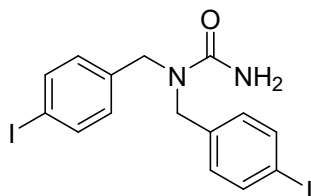

**1,1-Bis(4-iodobenzyl)urea (4n)**

White solid; 83 mg, 84% yield;  **$^1\text{H}$  NMR (500 MHz, Chloroform - *d*)**  $\delta$  7.66 (d,  $J = 7.5$  Hz, 4H), 7.97 (d,  $J = 8.0$  Hz, 4H), 4.63 (s, 2H), 4.39 (s, 4H);  **$^{13}\text{C}$  NMR (126 MHz, Chloroform - *d*)**  $\delta$  159.1, 138.1, 136.8, 129.3, 93.2, 50.2; **HRMS (ESI):**  $m/z$  calcd for  $\text{C}_{15}\text{H}_{14}\text{I}_2\text{N}_2\text{O}$   $[\text{M} + \text{H}]^+$ : 492.9268, found: 492.9255.

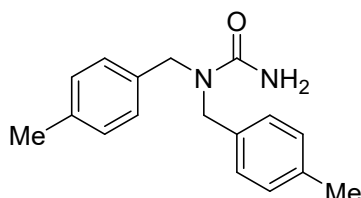

**1,1-Bis(4-methylbenzyl)urea (4o)**

White solid; 45 mg, 84% yield;  **$^1\text{H}$  NMR (500 MHz, Chloroform - *d*)**  $\delta$  7.16 - 7.12 (m, 8H), 4.63 (s, 2H), 4.44 (s, 4H), 2.34 (s, 6H);  **$^{13}\text{C}$  NMR (126 MHz, Chloroform -**

**d**)  $\delta$  159.5, 137.3, 134.4, 129.6, 127.4, 50.2, 21.2; **HRMS (ESI)**:  $m/z$  calcd for  $C_{17}H_{20}N_2O$   $[M + H]^+$ : 269.1648, found: 269.1642.

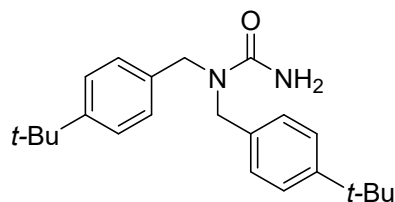

#### 1,1-Bis(4-(*tert*-butyl)benzyl)urea (4p)

White solid; 57 mg, 81% yield;  $^1H$  NMR (500 MHz, Chloroform - *d*)  $\delta$  7.38 - 7.35 (m, 4H), 7.19 (d,  $J = 8.5$  Hz, 4H), 4.81 (s, 2H), 4.47 (s, 4H), 1.33 (s, 18H);  $^{13}C$  NMR (126 MHz, Chloroform - *d*)  $\delta$  159.7, 150.5, 134.4, 127.1, 125.8, 50.2, 34.6, 31.5; **HRMS (ESI)**:  $m/z$  calcd for  $C_{23}H_{32}N_2O$   $[M + H]^+$ : 353.2587, found: 353.2580.

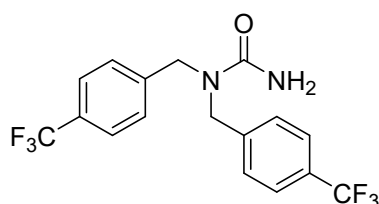

#### 1,1-Bis(4-(trifluoromethyl)benzyl)urea (4q)

White solid; 62 mg, 82% yield;  $^1H$  NMR (500 MHz, Chloroform - *d*)  $\delta$  7.59 (d,  $J = 8.0$  Hz, 4H), 7.35 (d,  $J = 8.0$  Hz, 4H), 4.91 (s, 2H), 4.53 (s, 4H);  $^{13}C$  NMR (126 MHz, Chloroform - *d*)  $\delta$  159.3, 141.2, 130.3 (q,  $J = 32.8$  Hz), 127.6, 126.0 (q,  $J = 3.8$  Hz), 124.1 (q,  $J = 272.2$  Hz), 50.4;  $^{19}F$  NMR (376 MHz, Chloroform - *d*)  $\delta$  -62.6; **HRMS (ESI)**:  $m/z$  calcd for  $C_{17}H_{14}F_6N_2O$   $[M + H]^+$ : 377.1083, found: 377.1075.

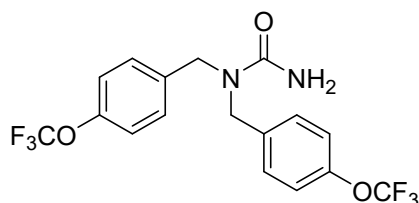

#### 1,1-Bis(4-(trifluoromethoxy)benzyl)urea (4r)

White solid; 65 mg, 80% yield;  $^1H$  NMR (500 MHz, Chloroform - *d*)  $\delta$  7.27 (d,  $J = 8.5$  Hz, 4H), 7.20 (d,  $J = 8.0$  Hz, 4H), 4.92 (s, 2H), 4.49 (s, 4H);  $^{13}C$  NMR (126 MHz, Chloroform - *d*)  $\delta$  159.3, 148.8 (q,  $J = 2.1$  Hz), 135.9, 128.7, 121.5 (q,  $J = 258.3$  Hz), 50.0;  $^{19}F$  NMR (126 MHz, Chloroform - *d*)  $\delta$  -58.0; **HRMS (ESI)**:  $m/z$  calcd for  $C_{17}H_{14}F_6N_2O_3$   $[M + H]^+$ : 409.0981, found: 409.0972.

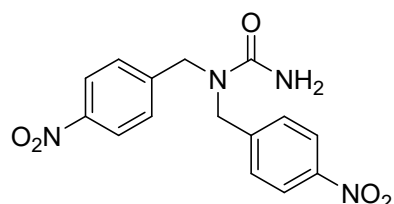

### 1,1-Bis(4-nitrobenzyl)urea (4s)

Brown solid; 52 mg, 79% yield;  $^1\text{H NMR}$  (500 MHz, Chloroform - *d*)  $\delta$  8.22 - 8.19 (m, 4H), 7.42 (d,  $J = 8.5$  Hz, 4H), 4.72 (s, 2H), 4.60 (s, 4H);  $^{13}\text{C NMR}$  (126 MHz, Chloroform - *d*)  $\delta$  158.7, 147.8, 144.3, 128.0, 124.4, 50.5; HRMS (ESI):  $m/z$  calcd for  $\text{C}_{15}\text{H}_{14}\text{N}_4\text{O}_5$   $[\text{M} + \text{H}]^+$ : 331.1037, found: 331.1029.

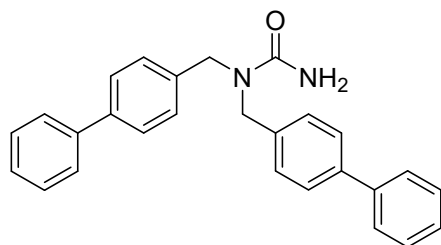

### 1,1-Bis([1,1'-biphenyl]-4-ylmethyl)urea (4t)

White solid; 63 mg, 80% yield;  $^1\text{H NMR}$  (500 MHz, Chloroform - *d*)  $\delta$  7.60 - 7.58 (m, 8H), 7.47 - 7.44 (m, 4H), 7.38 - 7.35 (m, 6H), 4.76 (s, 2H), 4.58 (s, 4H);  $^{13}\text{C NMR}$  (126 MHz, Chloroform - *d*)  $\delta$  159.5, 140.8, 140.7, 136.4, 128.9, 127.8, 127.7, 127.5, 127.2, 50.4; HRMS (ESI):  $m/z$  calcd for  $\text{C}_{27}\text{H}_{24}\text{N}_2\text{O}$   $[\text{M} + \text{H}]^+$ : 393.1961, found: 393.1952.

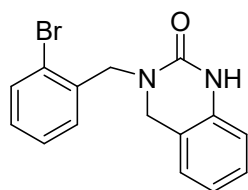

### 3-(2-Bromobenzyl)-3,4-dihydroquinazolin-2(1H)-one (5a)

White solid; 51 mg, 80% yield;  $^1\text{H NMR}$  (500 MHz, DMSO -  $d_6$ )  $\delta$  9.41 (s 1H), 7.65 (d,  $J = 8.0$  Hz, 1H), 7.38 (t,  $J = 7.5$  Hz, 1H), 7.27 - 7.22 (m, 2H), 7.15 (t,  $J = 7.5$  Hz, 1H), 7.05 (d,  $J = 7.5$  Hz, 1H), 6.88 - 6.83 (m, 2H), 4.60 (s, 2H), 4.42 (s, 2H);  $^{13}\text{C NMR}$  (126 MHz, DMSO -  $d_6$ )  $\delta$  153.6, 137.5, 136.0, 132.7, 129.1, 128.2, 128.0, 127.9, 125.6, 122.6, 121.1, 117.5, 113.4, 49.8, 48.1; HRMS (ESI):  $m/z$  calcd for  $\text{C}_{15}\text{H}_{13}\text{BrN}_2\text{O}$   $[\text{M} + \text{H}]^+$ : 317.0284, found: 317.0280.

## 4. X-ray Spectra

### Single crystal data for compound 3m

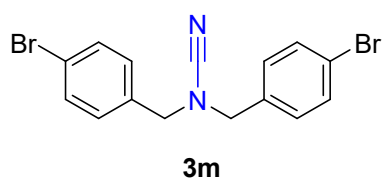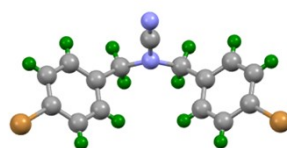

**3m** X-ray (CCDC 2324482)

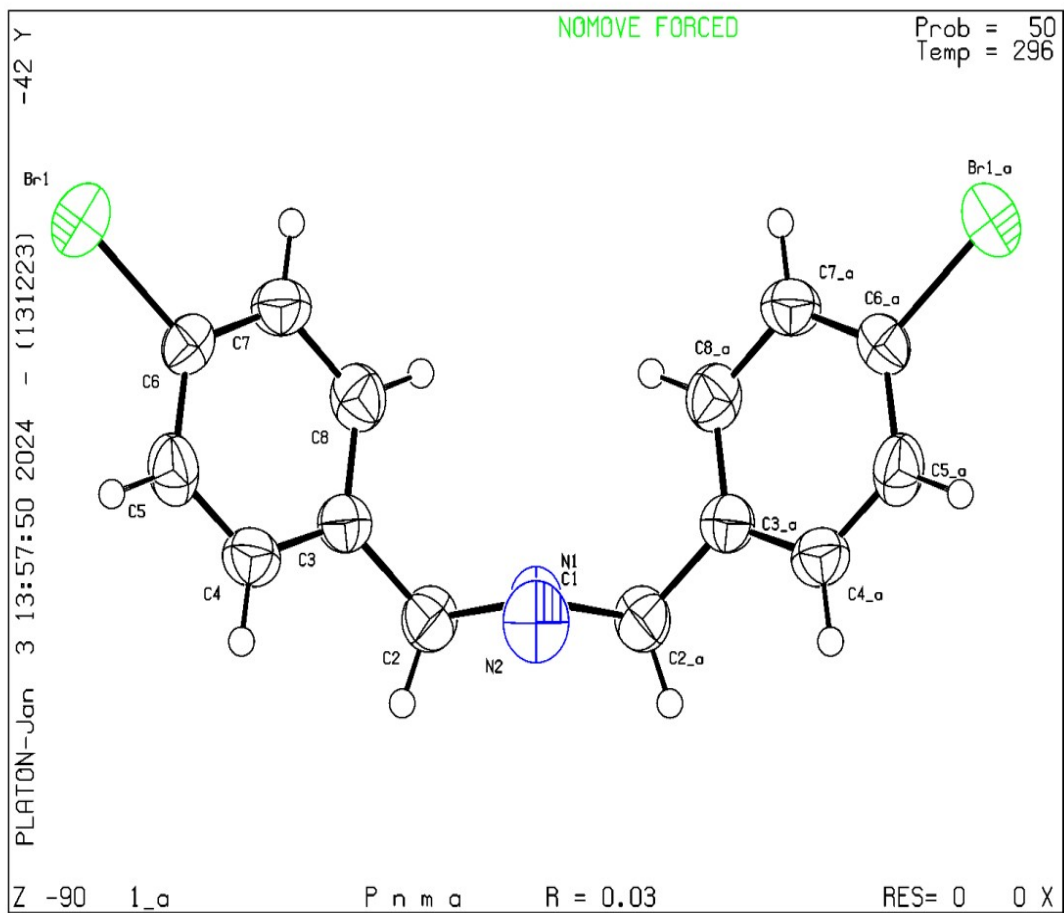





---

The following ALERTS were generated. Each ALERT has the format  
**test-name\_ALERT\_alert-type\_alert-level**.  
Click on the hyperlinks for more details of the test.

---

**Alert level C**

|                   |             |   |                           |             |
|-------------------|-------------|---|---------------------------|-------------|
| PLAT148_ALERT_3_C | s.u. on the | a | - Axis is (Too) Large ... | 0.012 Ang.  |
| PLAT148_ALERT_3_C | s.u. on the | b | - Axis is (Too) Large ... | 0.0300 Ang. |
| PLAT148_ALERT_3_C | s.u. on the | c | - Axis is (Too) Large ... | 0.005 Ang.  |

---

**Alert level G**

|                   |                                                  |              |
|-------------------|--------------------------------------------------|--------------|
| PLAT883_ALERT_1_G | No Info/Value for _atom_sites_solution_primary . | Please Do !  |
| PLAT933_ALERT_2_G | Number of HKL-OMIT Records in Embedded .res File | 6 Note       |
|                   | 6 1 2, 4 1 3, 3 1 1, 9 1 1, 6 1 0, 3 1 3,        |              |
| PLAT965_ALERT_2_G | The SHELXL WEIGHT Optimisation has not Converged | Please Check |

---

0 **ALERT level A** = Most likely a serious problem - resolve or explain  
0 **ALERT level B** = A potentially serious problem, consider carefully  
3 **ALERT level C** = Check. Ensure it is not caused by an omission or oversight  
3 **ALERT level G** = General information/check it is not something unexpected

1 ALERT type 1 CIF construction/syntax error, inconsistent or missing data  
2 ALERT type 2 Indicator that the structure model may be wrong or deficient  
3 ALERT type 3 Indicator that the structure quality may be low  
0 ALERT type 4 Improvement, methodology, query or suggestion  
0 ALERT type 5 Informative message, check

---

It is advisable to attempt to resolve as many as possible of the alerts in all categories. Often the minor alerts point to easily fixed oversights, errors and omissions in your CIF or refinement strategy, so attention to these fine details can be worthwhile. In order to resolve some of the more serious problems it may be necessary to carry out additional measurements or structure refinements. However, the purpose of your study may justify the reported deviations and the more serious of these should normally be commented upon in the discussion or experimental section of a paper or in the "special\_details" fields of the CIF. checkCIF was carefully designed to identify outliers and unusual parameters, but every test has its limitations and alerts that are not important in a particular case may appear. Conversely, the absence of alerts does not guarantee there are no aspects of the results needing attention. It is up to the individual to critically assess their own results and, if necessary, seek expert advice.

### Publication of your CIF in IUCr journals

A basic structural check has been run on your CIF. These basic checks will be run on all CIFs submitted for publication in IUCr journals (*Acta Crystallographica*, *Journal of Applied Crystallography*, *Journal of Synchrotron Radiation*); however, if you intend to submit to *Acta Crystallographica Section C* or *E* or *IUCrData*, you should make sure that **full publication checks** are run on the final version of your CIF prior to submission.

### Publication of your CIF in other journals

Please refer to the *Notes for Authors* of the relevant journal for any special instructions relating to CIF submission.

## Single crystal data for compound 3s

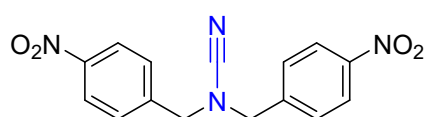

3s

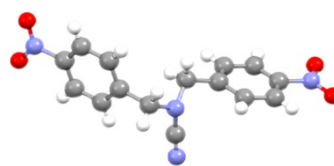

3s X-ray(CCDC 2324486)

Datablock 1\_a - ellipsoid plot

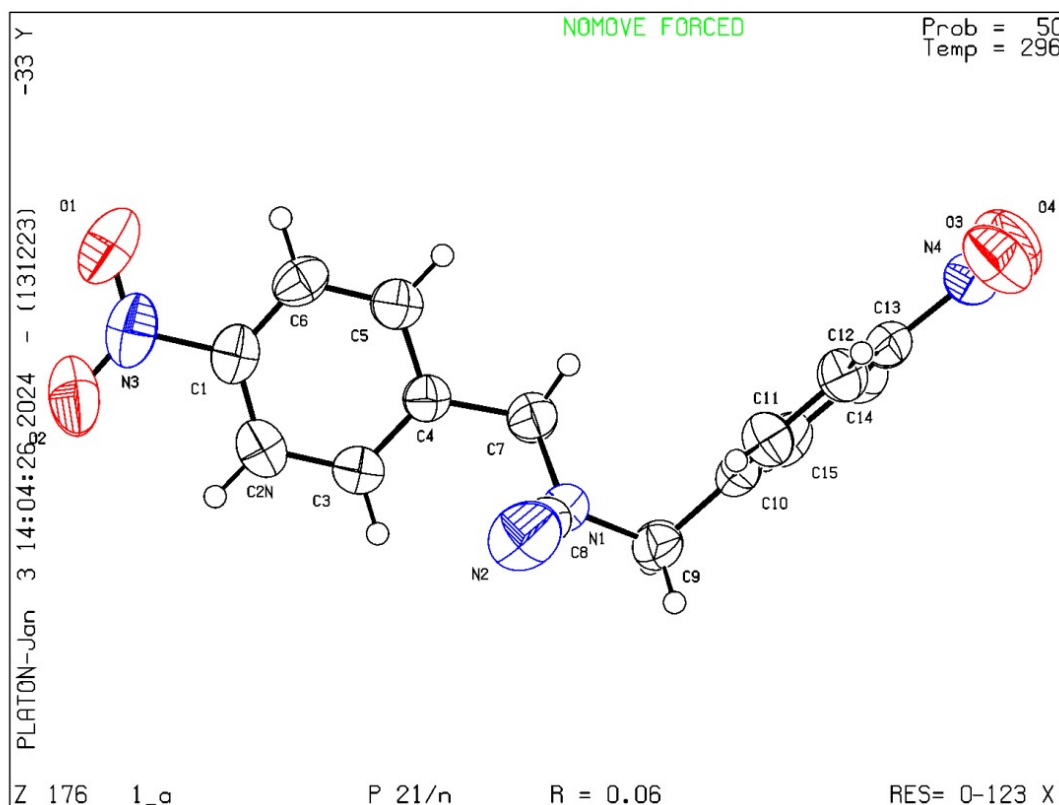

## checkCIF/PLATON report

You have not supplied any structure factors. As a result the full set of tests cannot be run.

THIS REPORT IS FOR GUIDANCE ONLY. IF USED AS PART OF A REVIEW PROCEDURE FOR PUBLICATION, IT SHOULD NOT REPLACE THE EXPERTISE OF AN EXPERIENCED CRYSTALLOGRAPHIC REFEREE.

No syntax errors found. [CIF dictionary](#) [Interpreting this report](#)

## Datablock: 1\_a

|                 |                |                    |                |
|-----------------|----------------|--------------------|----------------|
| Bond precision: | C-C = 0.0049 Å | Wavelength=0.71073 |                |
| Cell:           | a=9.0138 (8)   | b=13.9046 (14)     | c=11.9428 (13) |
|                 | alpha=90       | beta=100.927 (2)   | gamma=90       |
| Temperature:    | 296 K          |                    |                |
|                 | Calculated     | Reported           |                |
| Volume          | 1469.7(3)      | 1469.7(3)          |                |
| Space group     | P 21/n         | P 21/n             |                |

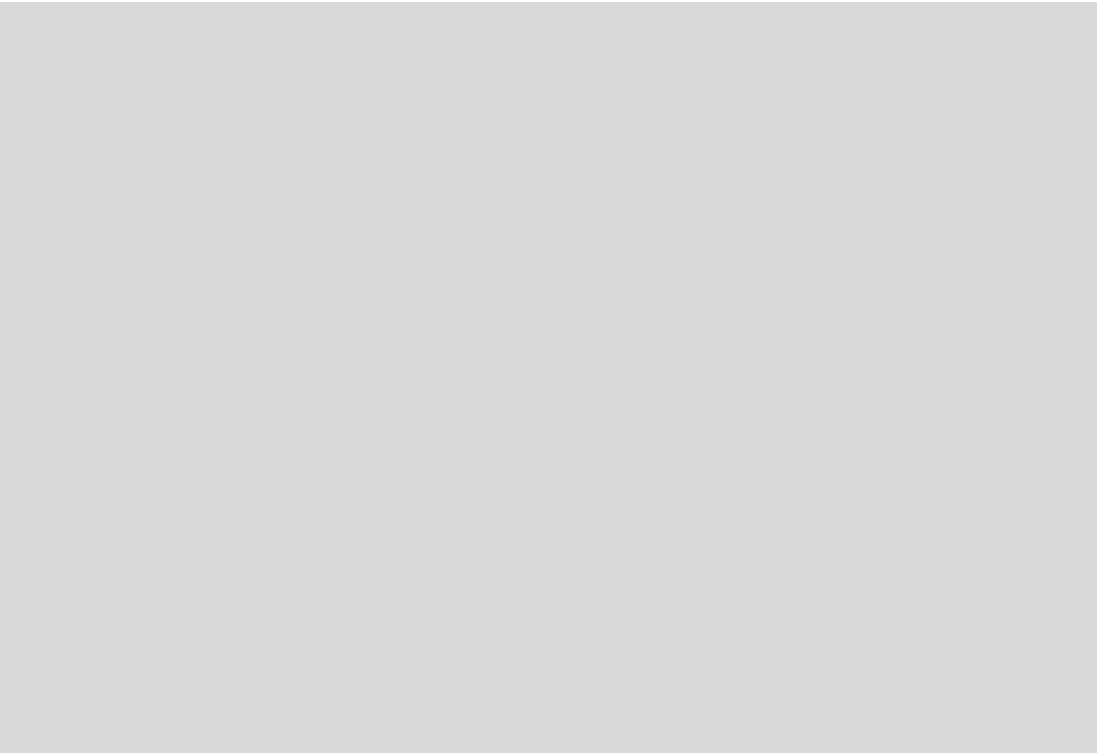

---

The following ALERTS were generated. Each ALERT has the format  
**test-name\_ALERT\_alert-type\_alert-level.**  
Click on the hyperlinks for more details of the test.

---

**● Alert level C**  
PLAT026\_ALERT\_3\_C Ratio Observed / Unique Reflections (too) Low .. 47% Check  
PLAT340\_ALERT\_3\_C Low Bond Precision on C-C Bonds ..... 0.00486 Ang.

---

**● Alert level G**  
PLAT883\_ALERT\_1\_G No Info/Value for \_atom\_sites\_solution\_primary . Please Do !  
PLAT941\_ALERT\_3\_G Average HKL Measurement Multiplicity ..... 4.9 Low  
PLAT965\_ALERT\_2\_G The SHELXL WEIGHT Optimisation has not Converged Please Check

- 
- 0 **ALERT level A** = Most likely a serious problem - resolve or explain
  - 0 **ALERT level B** = A potentially serious problem, consider carefully
  - 2 **ALERT level C** = Check. Ensure it is not caused by an omission or oversight
  - 3 **ALERT level G** = General information/check it is not something unexpected
- 
- 1 ALERT type 1 CIF construction/syntax error, inconsistent or missing data
  - 1 ALERT type 2 Indicator that the structure model may be wrong or deficient
  - 3 ALERT type 3 Indicator that the structure quality may be low
  - 0 ALERT type 4 Improvement, methodology, query or suggestion
  - 0 ALERT type 5 Informative message, check
-



It is advisable to attempt to resolve as many as possible of the alerts in all categories. Often the minor alerts point to easily fixed oversights, errors and omissions in your CIF or refinement strategy, so attention to these fine details can be worthwhile. In order to resolve some of the more serious problems it may be necessary to carry out additional measurements or structure refinements. However, the purpose of your study may justify the reported deviations and the more serious of these should normally be commented upon in the discussion or experimental section of a paper or in the "special\_details" fields of the CIF. checkCIF was carefully designed to identify outliers and unusual parameters, but every test has its limitations and alerts that are not important in a particular case may appear. Conversely, the absence of alerts does not guarantee there are no aspects of the results needing attention. It is up to the individual to critically assess their own results and, if necessary, seek expert advice.

### Publication of your CIF in IUCr journals

A basic structural check has been run on your CIF. These basic checks will be run on all CIFs submitted for publication in IUCr journals (*Acta Crystallographica*, *Journal of Applied Crystallography*, *Journal of Synchrotron Radiation*); however, if you intend to submit to *Acta Crystallographica Section C* or *E* or *IUCrData*, you should make sure that **full publication checks** are run on the final version of your CIF prior to submission.

### Publication of your CIF in other journals

Please refer to the *Notes for Authors* of the relevant journal for any special instructions relating to CIF submission.

### Single crystal data for compound 4b

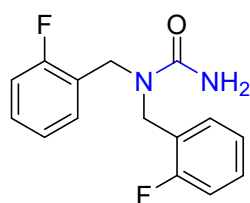

**4b**

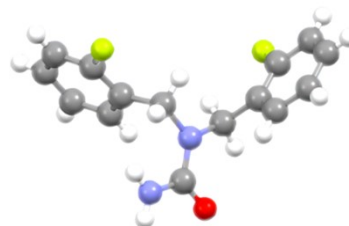

**4b X-ray**(CCDC 2324490)

Datablock 1\_a - ellipsoid plot

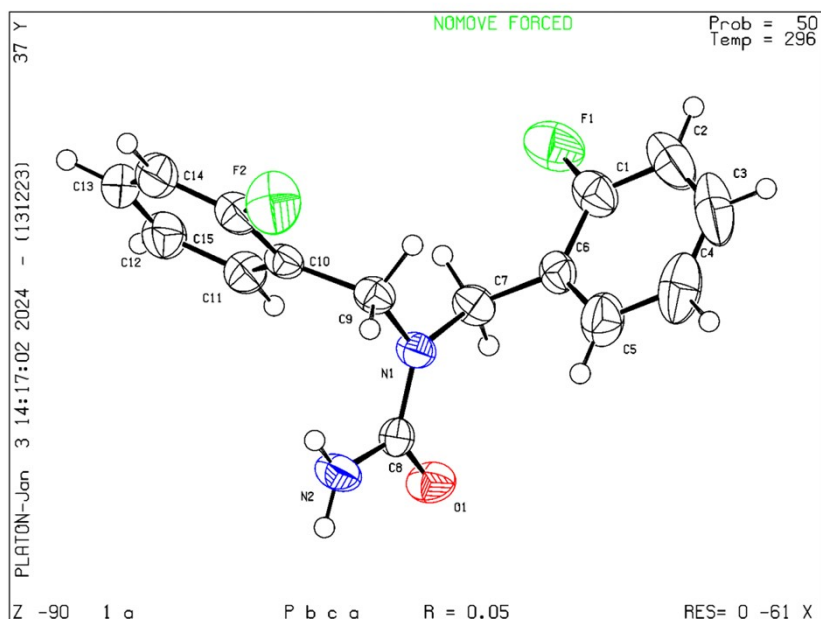



---

The following ALERTS were generated. Each ALERT has the format  
**test-name\_ALERT\_alert-type\_alert-level.**  
Click on the hyperlinks for more details of the test.

---

**Alert level C**

|                   |                           |     |           |   |       |       |
|-------------------|---------------------------|-----|-----------|---|-------|-------|
| PLAT334_ALERT_2_C | Small <C-C> Benzene Dist. | C1  | -C6       | . | 1.37  | Ang.  |
| PLAT414_ALERT_2_C | Short Intra D-H..H-X      | H2B | ..H9B     | . | 1.96  | Ang.  |
|                   |                           |     | x, y, z = |   | 1_555 | Check |

---

**Alert level G**

|                   |                                                  |  |  |        |   |             |
|-------------------|--------------------------------------------------|--|--|--------|---|-------------|
| PLAT003_ALERT_2_G | Number of Uiso or Uij Restrained non-H Atoms ... |  |  |        | 2 | Report      |
| PLAT007_ALERT_5_G | Number of Unrefined Donor-H Atoms .....          |  |  |        | 2 | Report      |
|                   | H2A H2B                                          |  |  |        |   |             |
| PLAT177_ALERT_4_G | The CIF-Embedded .res File Contains DELU Records |  |  |        | 1 | Report      |
| PLAT192_ALERT_3_G | A Non-default DELU Restraint Value for First Par |  |  | 0.0010 |   | Report      |
| PLAT192_ALERT_3_G | A Non-default DELU Restraint Value for SecondPar |  |  | 0.0020 |   | Report      |
| PLAT860_ALERT_3_G | Number of Least-Squares Restraints .....         |  |  |        | 1 | Note        |
| PLAT883_ALERT_1_G | No Info/Value for _atom_sites_solution_primary . |  |  |        |   | Please Do ! |

---

- 0 **ALERT level A** = Most likely a serious problem - resolve or explain
- 0 **ALERT level B** = A potentially serious problem, consider carefully
- 2 **ALERT level C** = Check. Ensure it is not caused by an omission or oversight
- 7 **ALERT level G** = General information/check it is not something unexpected

- 1 ALERT type 1 CIF construction/syntax error, inconsistent or missing data
  - 3 ALERT type 2 Indicator that the structure model may be wrong or deficient
  - 3 ALERT type 3 Indicator that the structure quality may be low
  - 1 ALERT type 4 Improvement, methodology, query or suggestion
  - 1 ALERT type 5 Informative message, check
- 

It is advisable to attempt to resolve as many as possible of the alerts in all categories. Often the minor alerts point to easily fixed oversights, errors and omissions in your CIF or refinement strategy, so attention to these fine details can be worthwhile. In order to resolve some of the more serious problems it may be necessary to carry out additional measurements or structure refinements. However, the purpose of your study may justify the reported deviations and the more serious of these should normally be commented upon in the discussion or experimental section of a paper or in the "special\_details" fields of the CIF. checkCIF was carefully designed to identify outliers and unusual parameters, but every test has its limitations and alerts that are not important in a particular case may appear. Conversely, the absence of alerts does not guarantee there are no aspects of the results needing attention. It is up to the individual to critically assess their own results and, if necessary, seek expert advice.

### Publication of your CIF in IUCr journals

A basic structural check has been run on your CIF. These basic checks will be run on all CIFs submitted for publication in IUCr journals (*Acta Crystallographica*, *Journal of Applied Crystallography*, *Journal of Synchrotron Radiation*); however, if you intend to submit to *Acta Crystallographica Section C* or *E* or *IUCrData*, you should make sure that **full publication checks** are run on the final version of your CIF prior to submission.

### Publication of your CIF in other journals

Please refer to the *Notes for Authors* of the relevant journal for any special instructions relating to CIF submission.

## 5. References

- [1] L. J. Wu, Q. R. Wang, J. Guo, J. P. Guo, J. N. Wei, P. Chen and Z. F. Xi, *Angewandte Chem*, 2023, **135**, e202219298;
- [2] F. Shi, M. R. Smith and R. E. Maleczka, *Organic Letters*, 2006, **8**, 1411-1414.

## 6. NMR spectra

### 3a <sup>1</sup>H NMR (500 MHz, CDCl<sub>3</sub>)

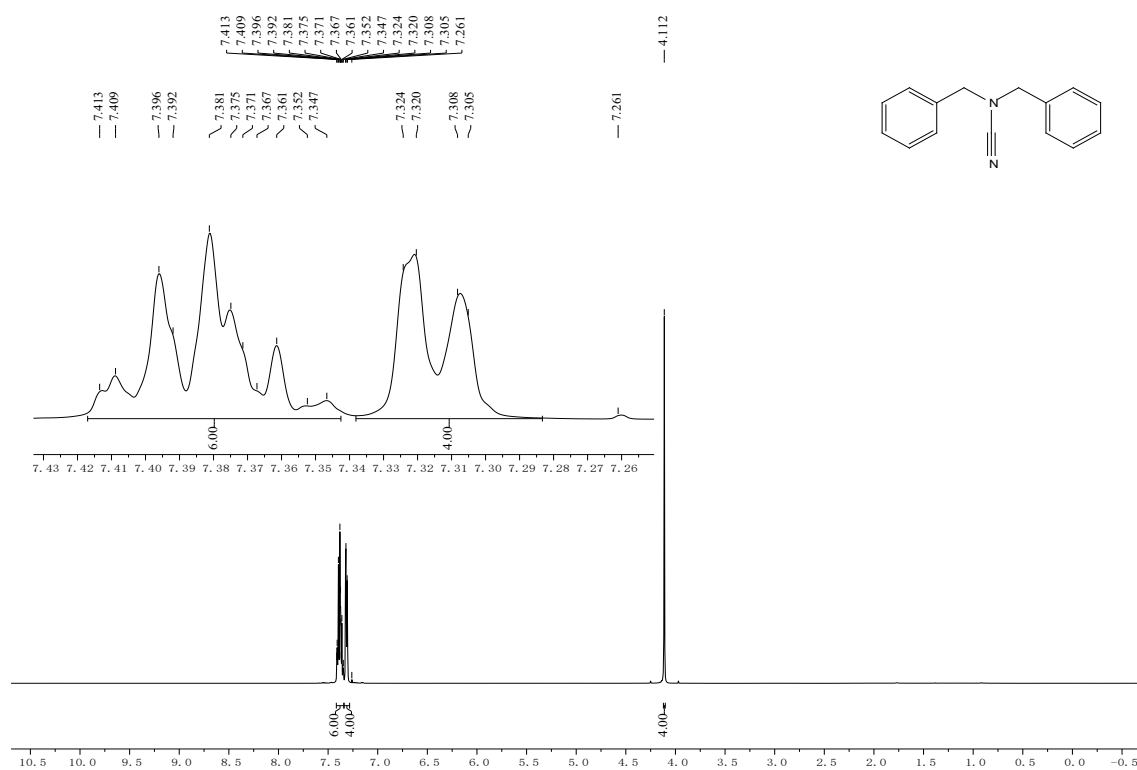

### 3a <sup>13</sup>C NMR (126 MHz, CDCl<sub>3</sub>)



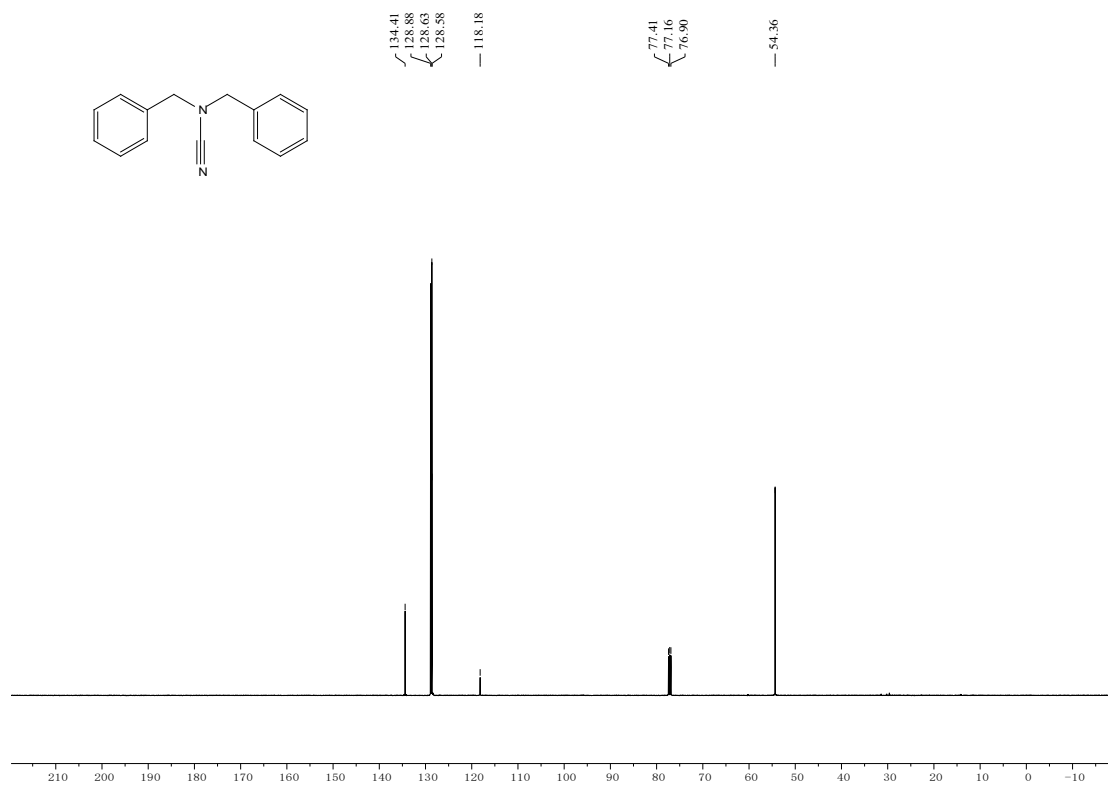

### 3a High Resolution Mass Spectrometry

10 #17 RT: 0.18 AV: 1 NL: 4.92E9  
T: FTMS + c APCI corona Full ms [50.0000-750.0000]

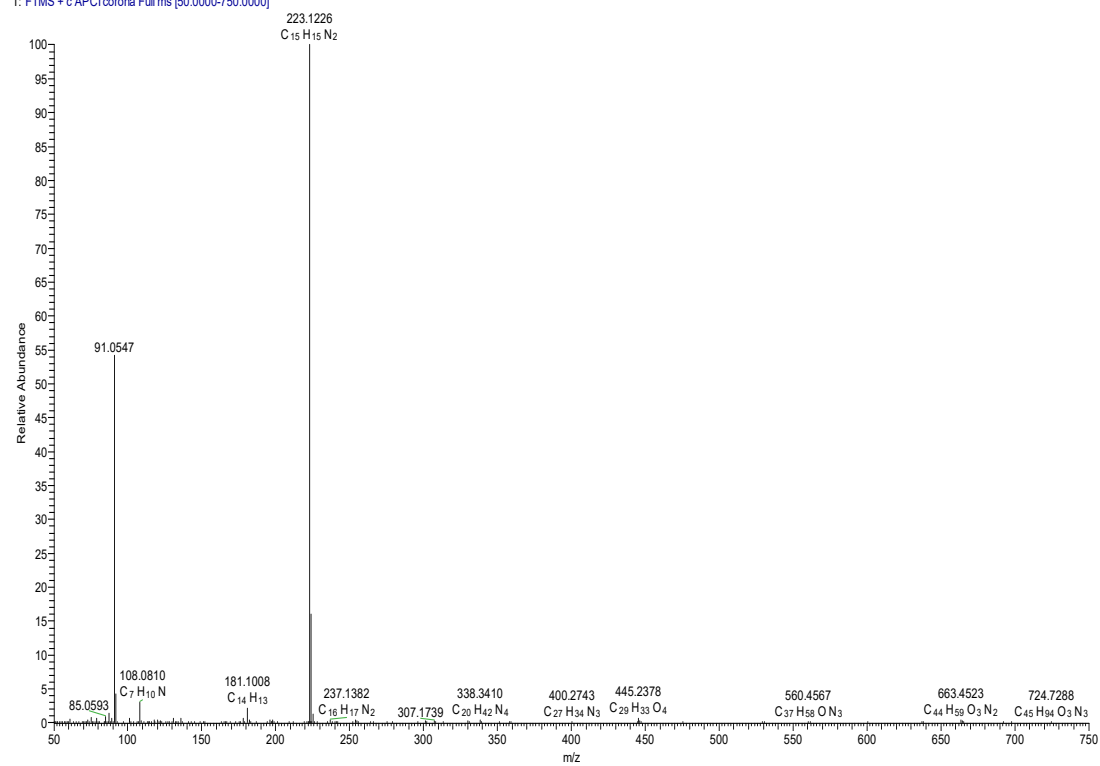

### 3b <sup>1</sup>H NMR (500 MHz, CDCl<sub>3</sub>)

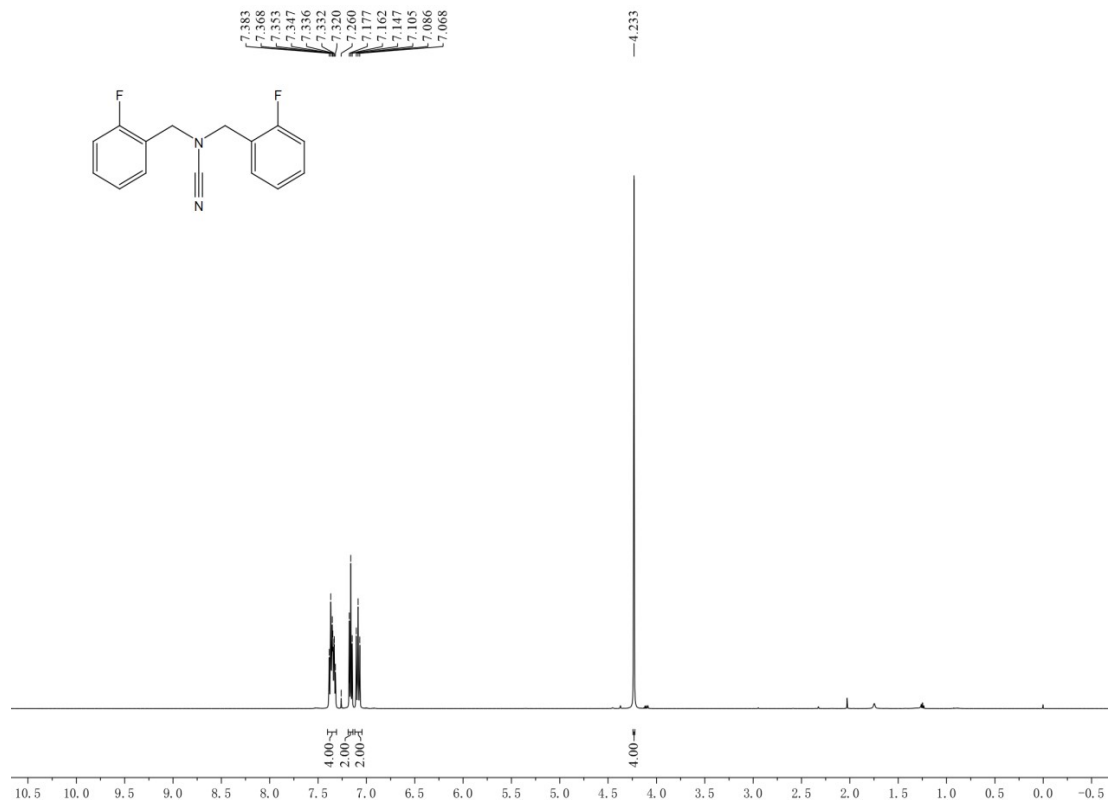

### 3b <sup>13</sup>C NMR (126 MHz, CDCl<sub>3</sub>)

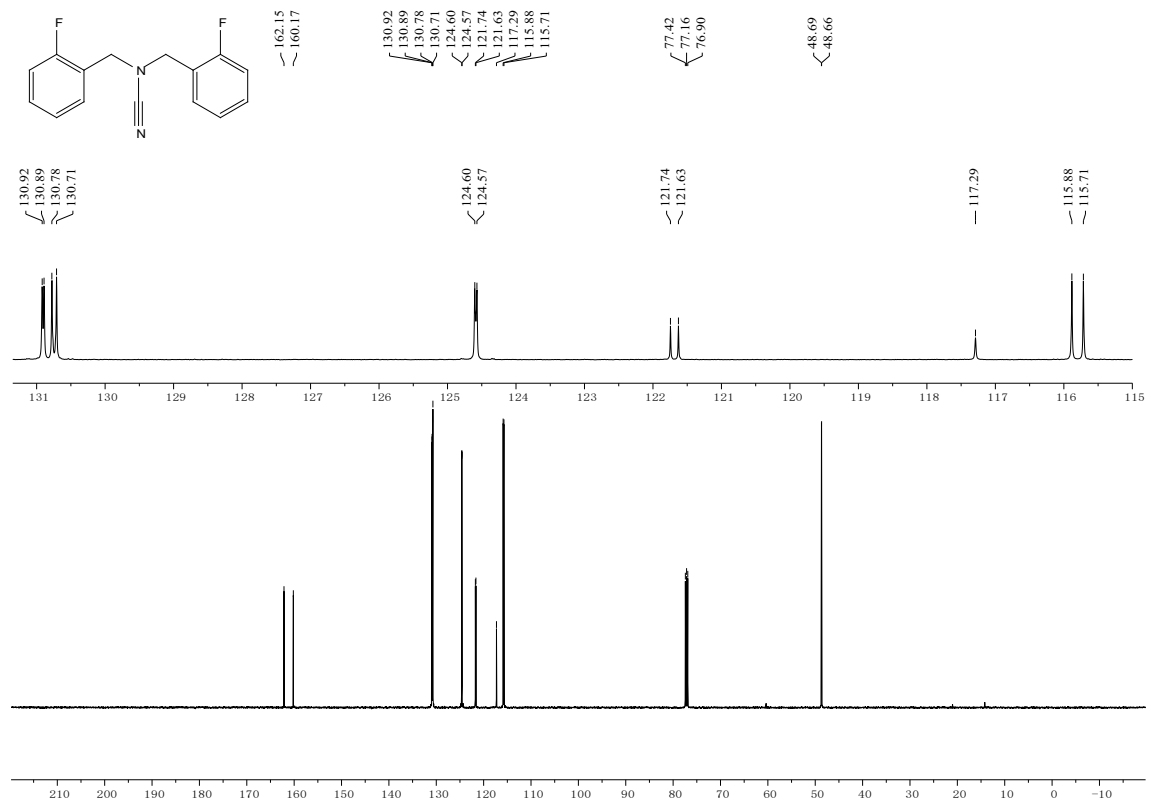

### 3b <sup>19</sup>F NMR (376 MHz, CDCl<sub>3</sub>)

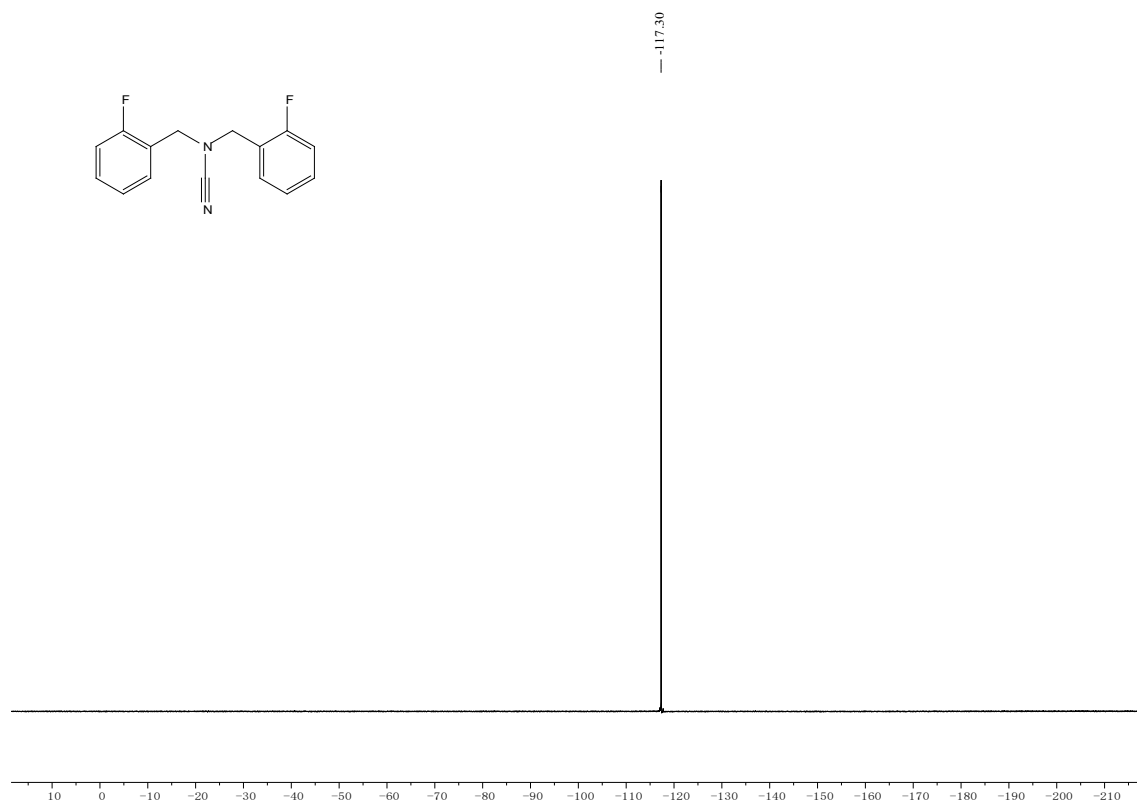

### 3c <sup>1</sup>H NMR (500 MHz, CDCl<sub>3</sub>)

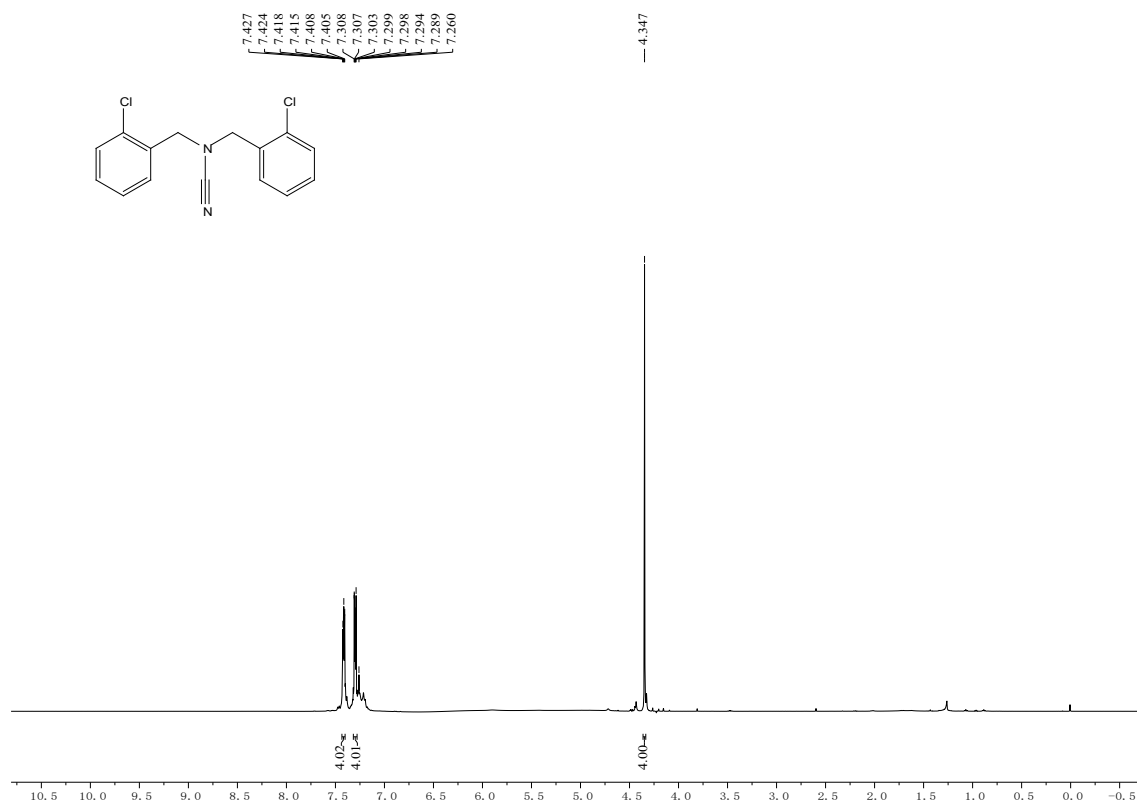

### 3c $^{13}\text{C}$ NMR (126 MHz, $\text{CDCl}_3$ )

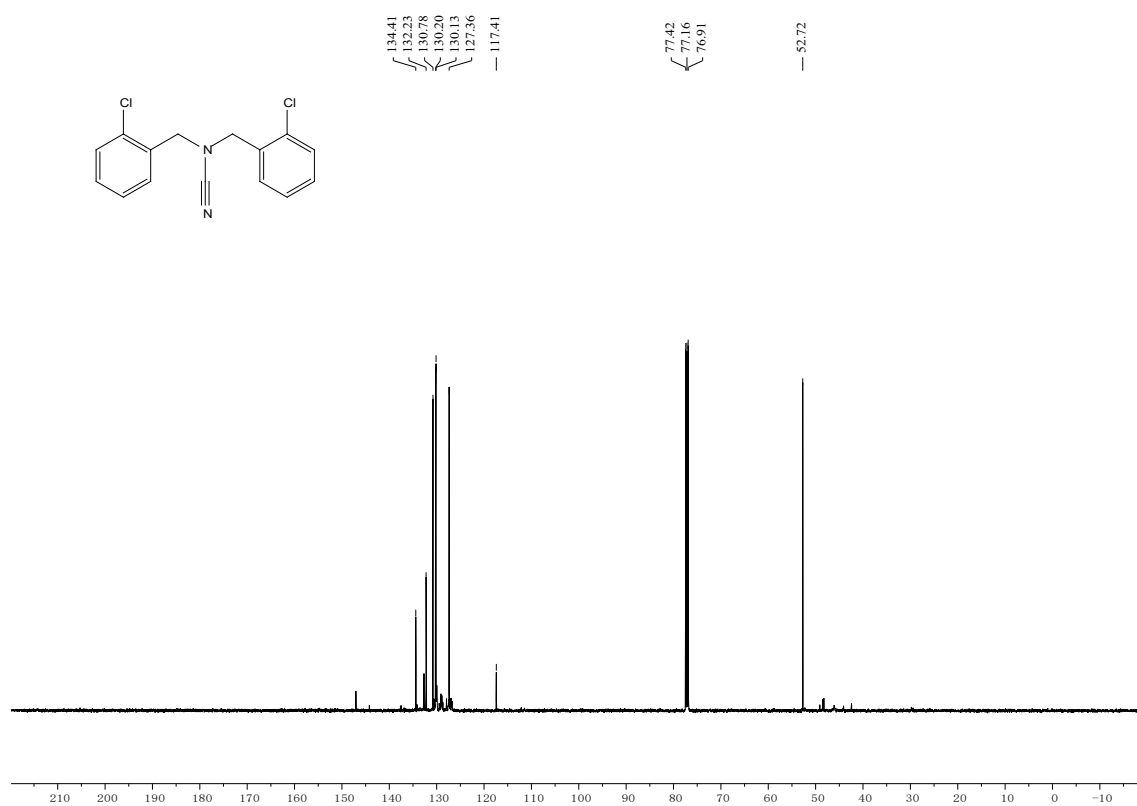

### 3d <sup>1</sup>H NMR (500 MHz, CDCl<sub>3</sub>)

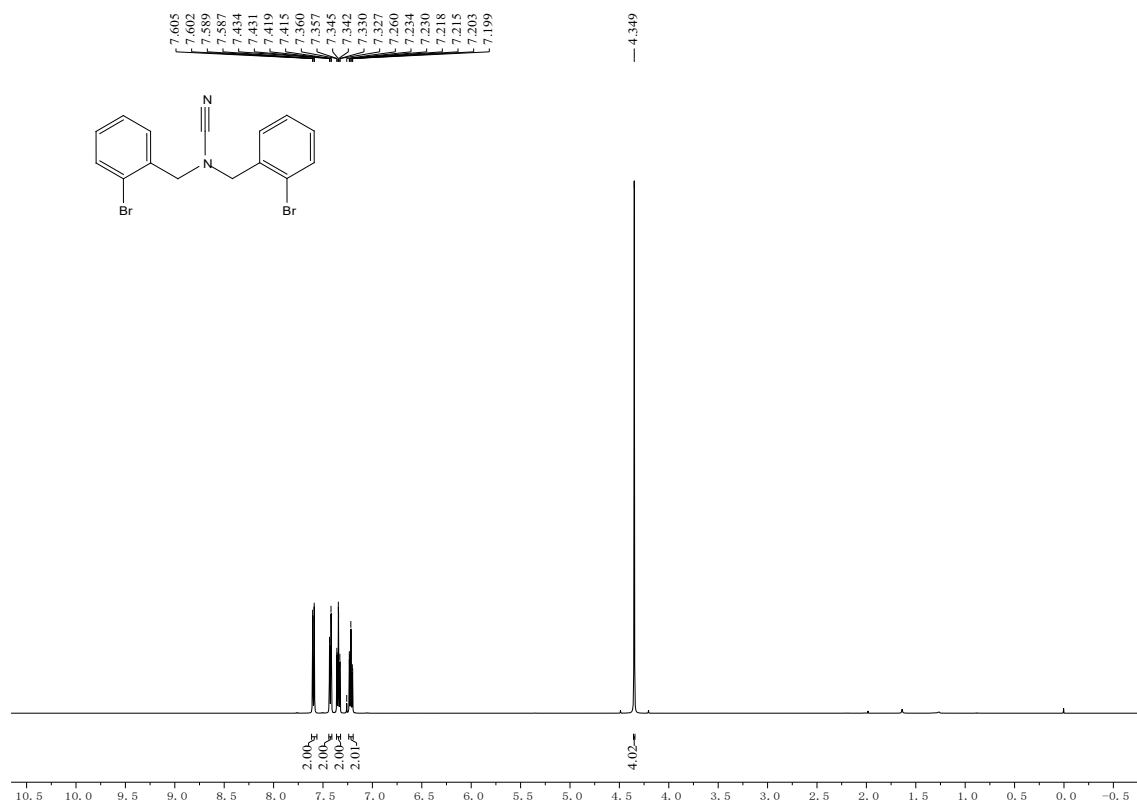

### 3d <sup>13</sup>C NMR (126 MHz, CDCl<sub>3</sub>)

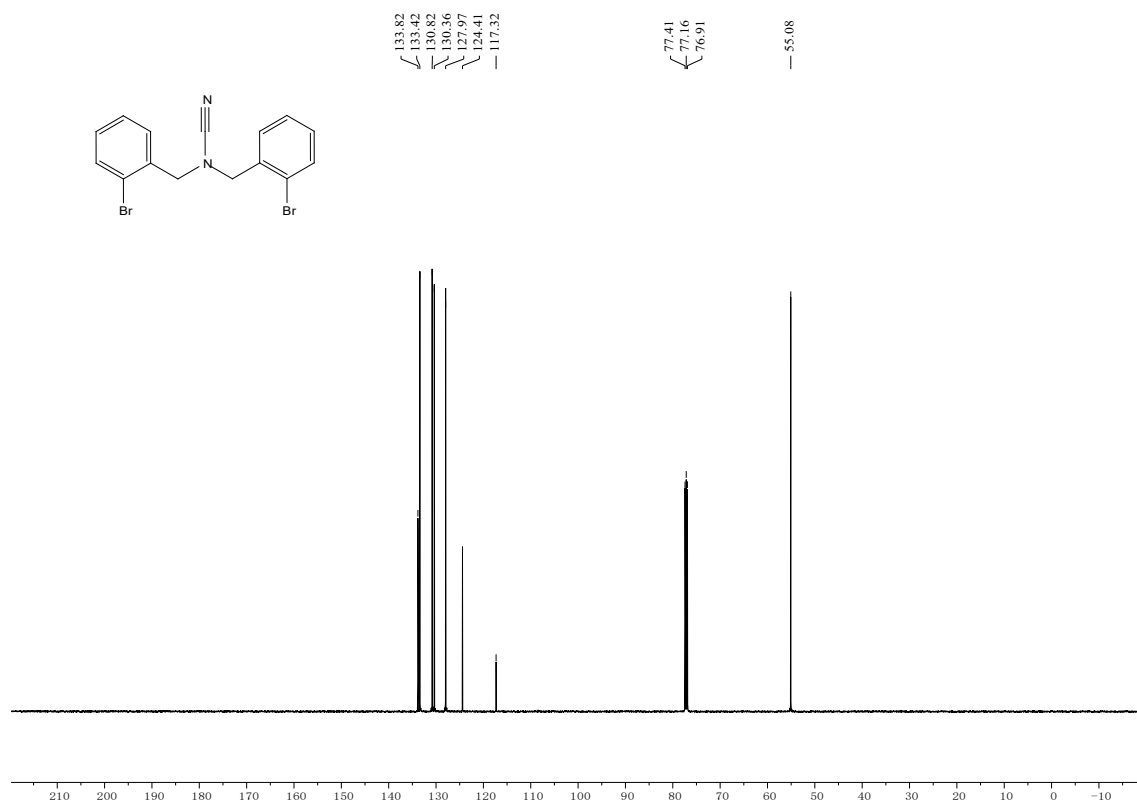

### 3e <sup>1</sup>H NMR (500 MHz, CDCl<sub>3</sub>)

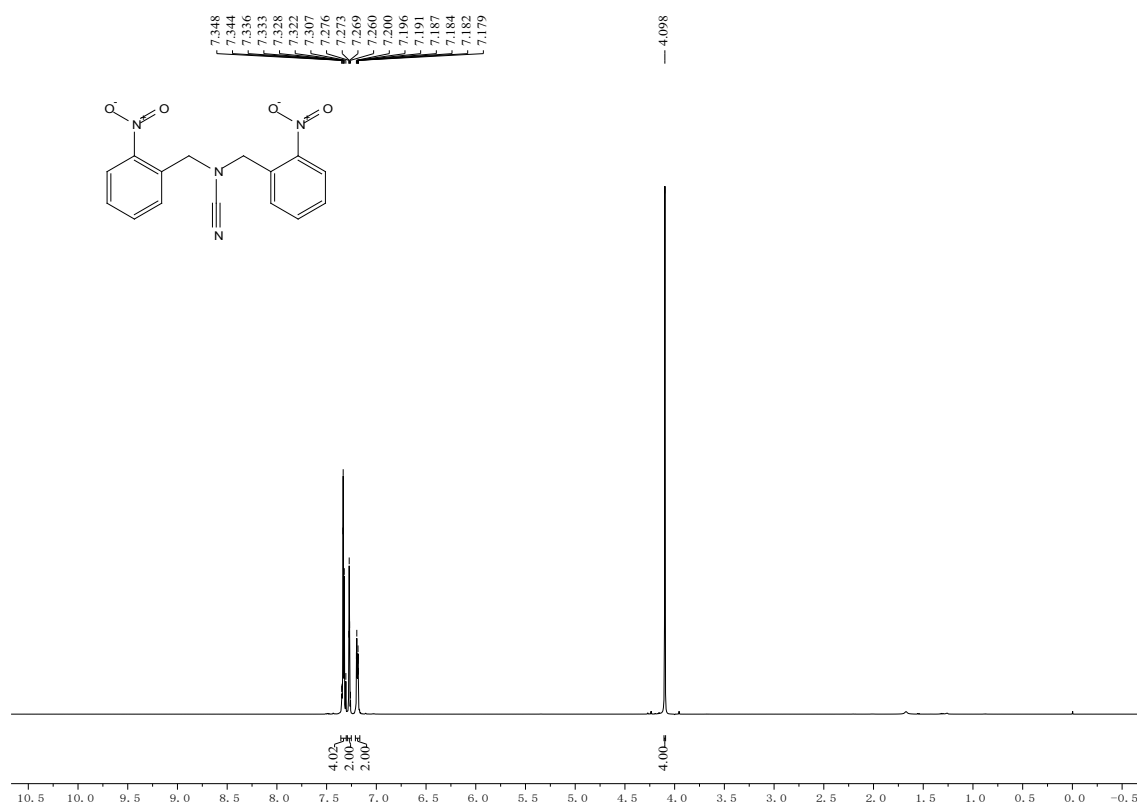

### 3e <sup>13</sup>C NMR (126 MHz, CDCl<sub>3</sub>)

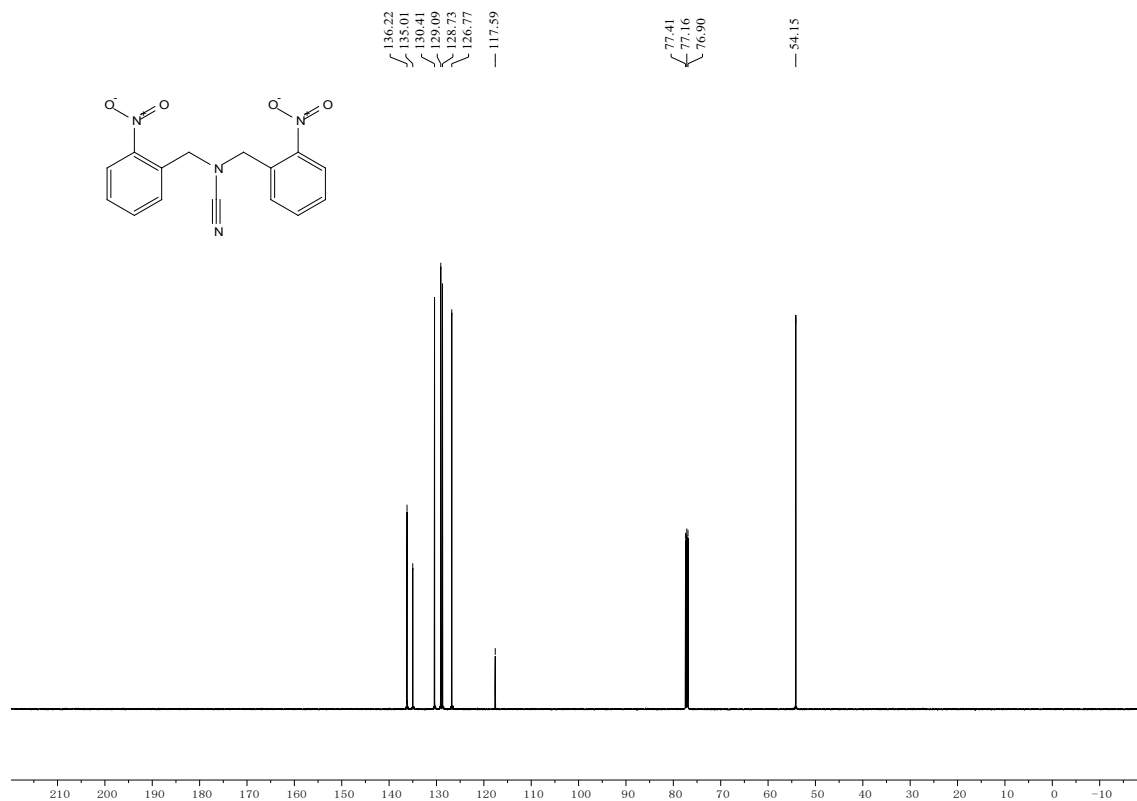

### 3f <sup>1</sup>H NMR (500 MHz, CDCl<sub>3</sub>)

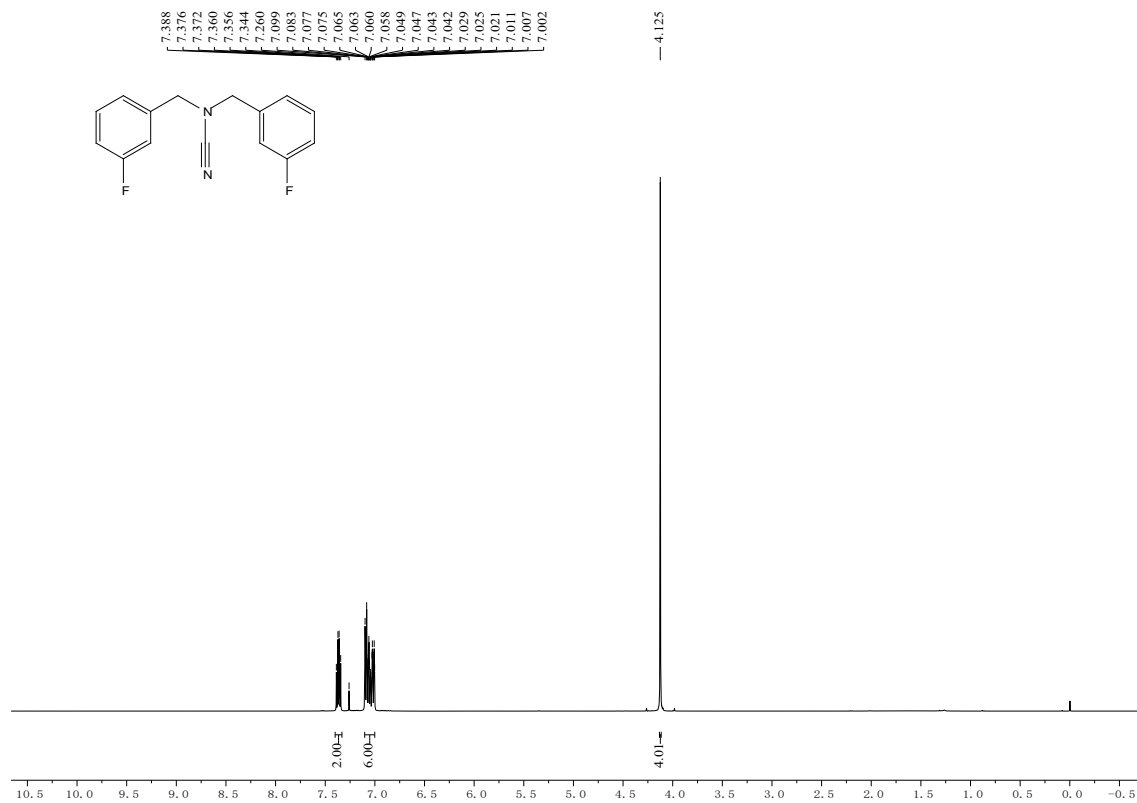

### 3f <sup>13</sup>C NMR (126 MHz, CDCl<sub>3</sub>)

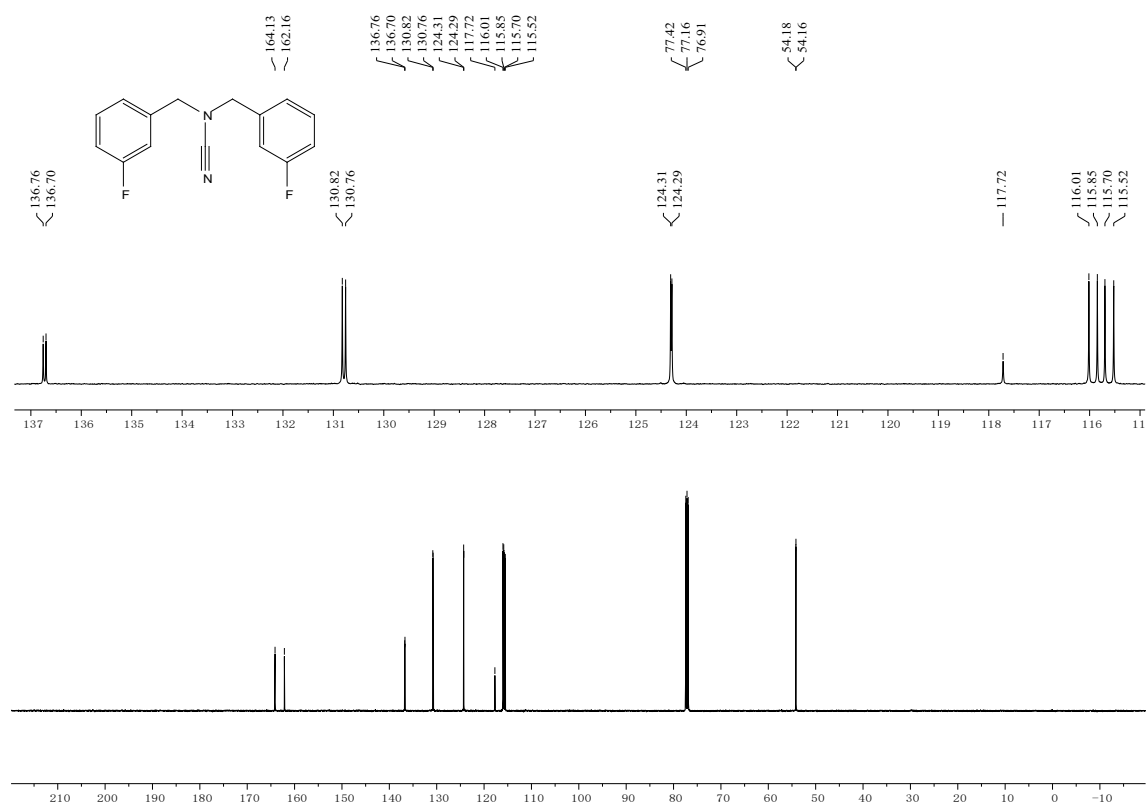



### 3f $^{13}\text{F}$ NMR (376 MHz, $\text{CDCl}_3$ )

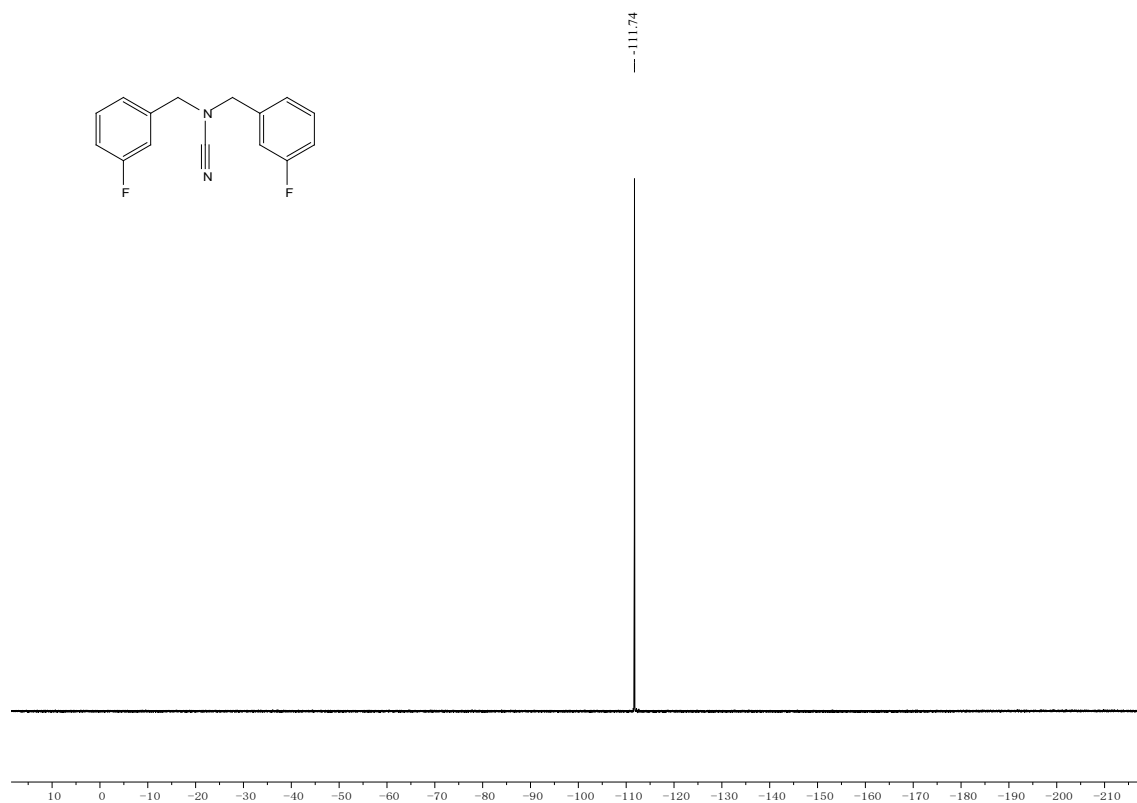

### 3g $^1\text{H}$ NMR (500 MHz, $\text{CDCl}_3$ )

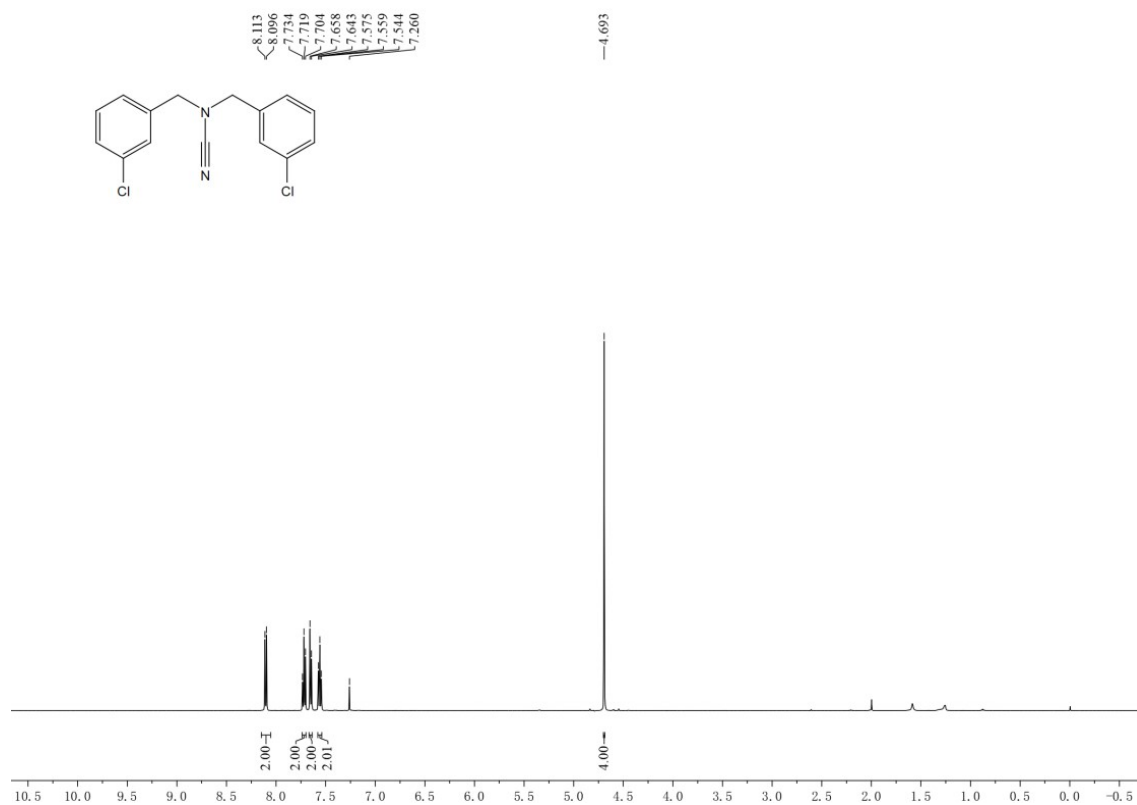



### 3h $^{13}\text{C}$ NMR (126 MHz, $\text{CDCl}_3$ )

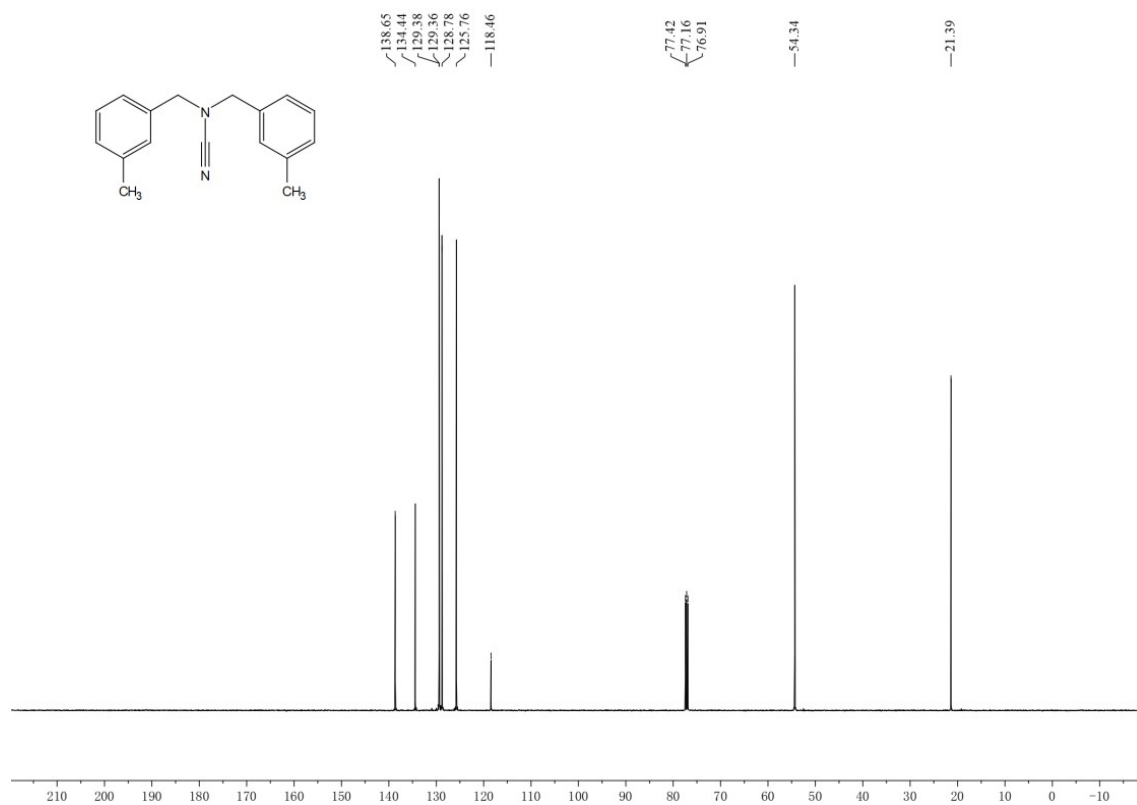

### 3i $^1\text{H}$ NMR (500 MHz, $\text{CDCl}_3$ )

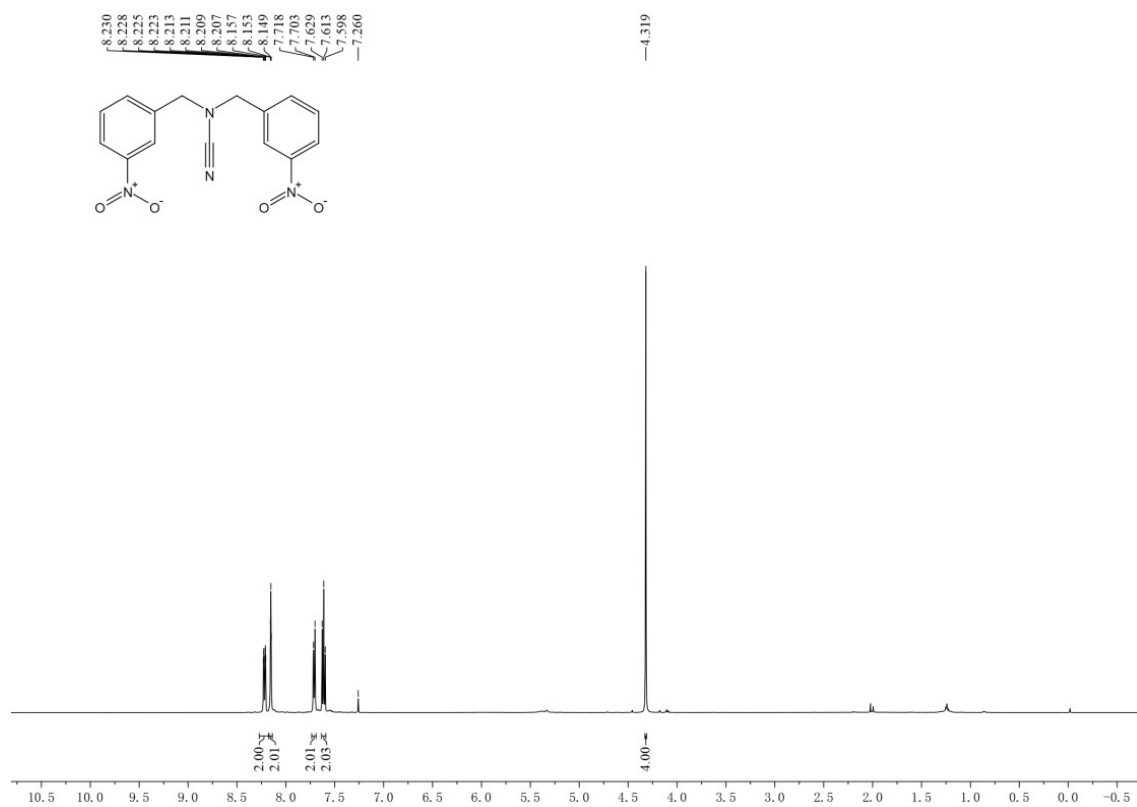

### 3i <sup>13</sup>C NMR (126 MHz, CDCl<sub>3</sub>)

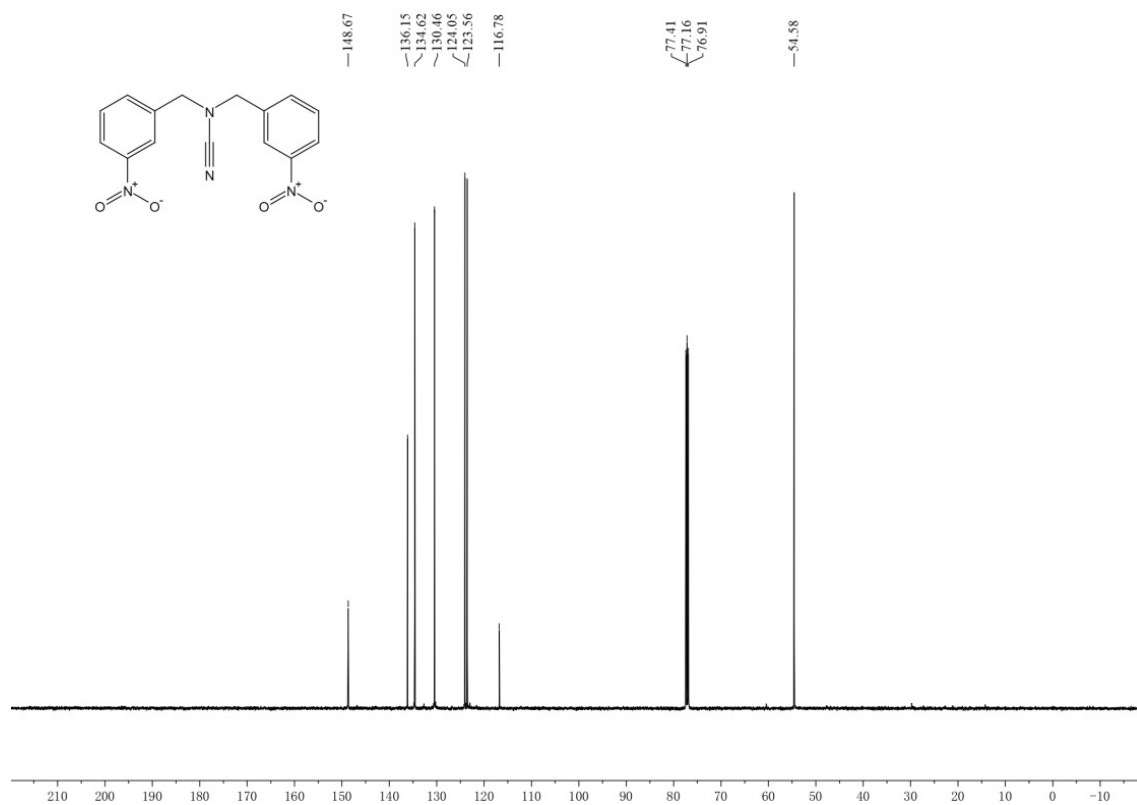

### 3j <sup>1</sup>H NMR (500 MHz, CDCl<sub>3</sub>)

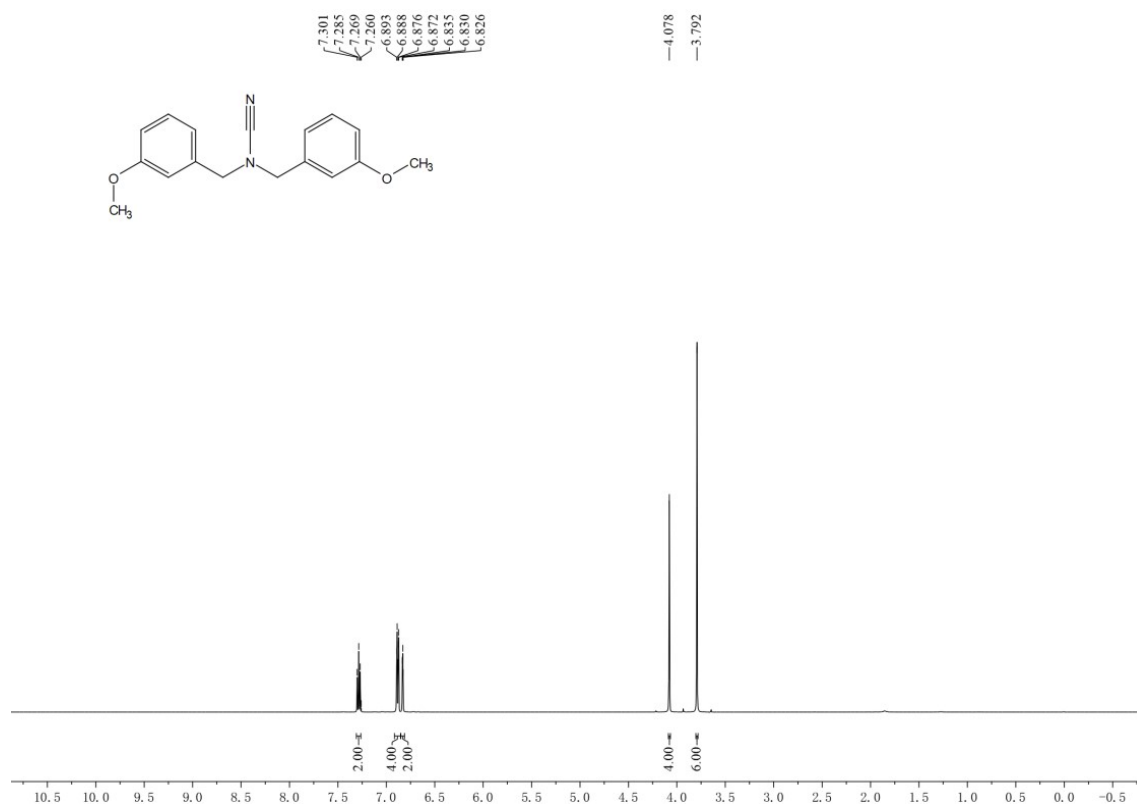

### 3j <sup>13</sup>C NMR (126 MHz, CDCl<sub>3</sub>)

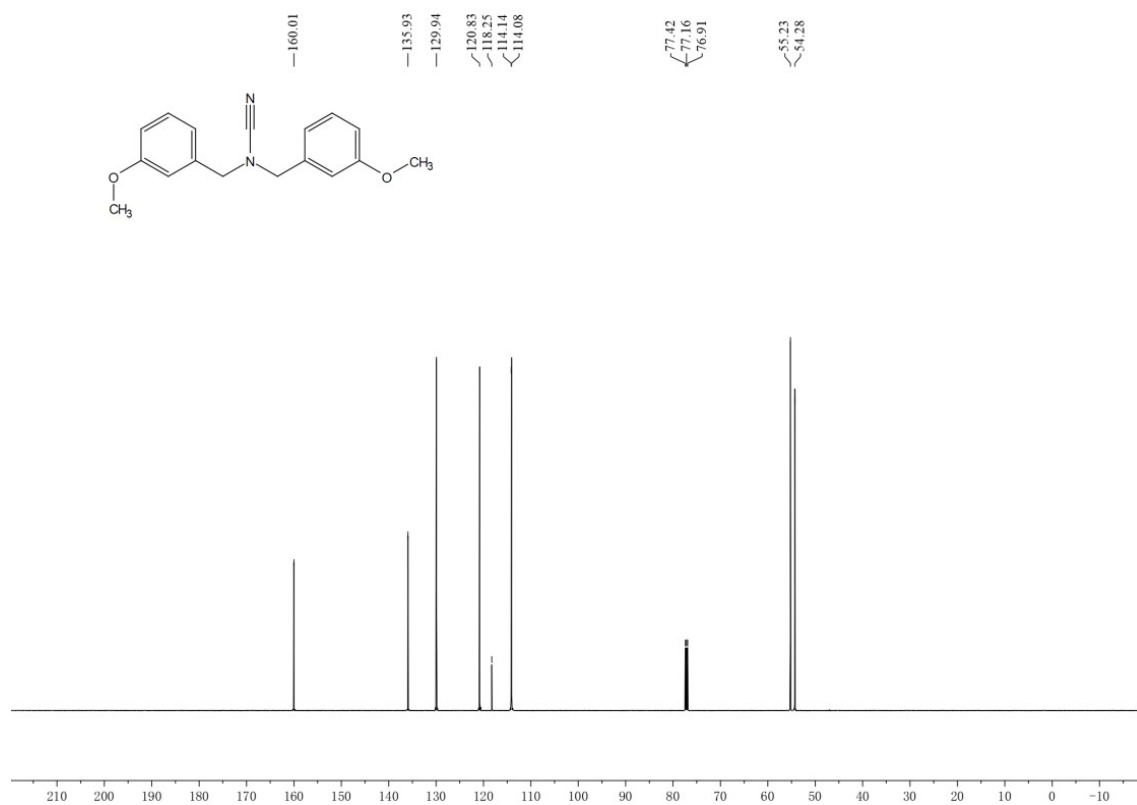

### 3k <sup>1</sup>H NMR (500 MHz, CDCl<sub>3</sub>)

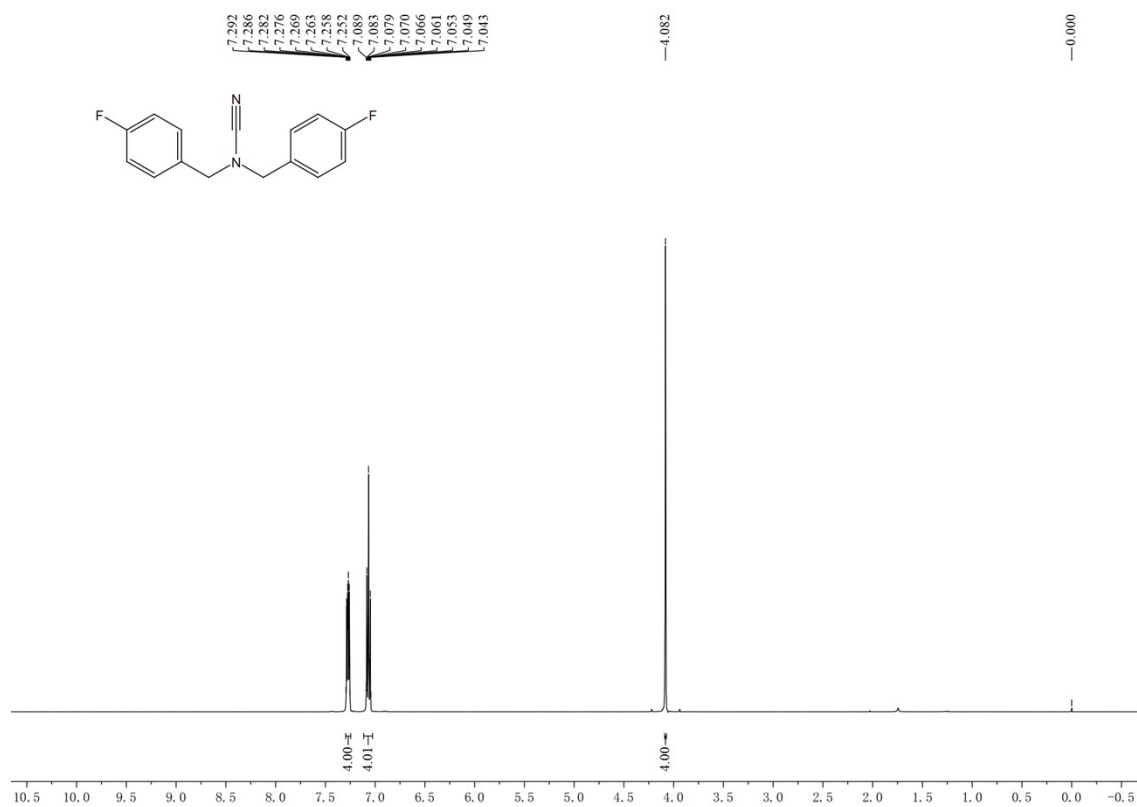

### 3k $^{13}\text{C}$ NMR (126 MHz, $\text{CDCl}_3$ )

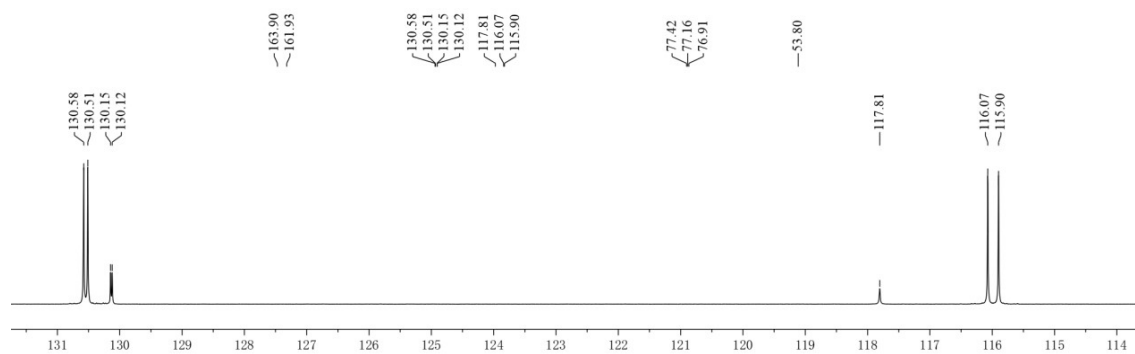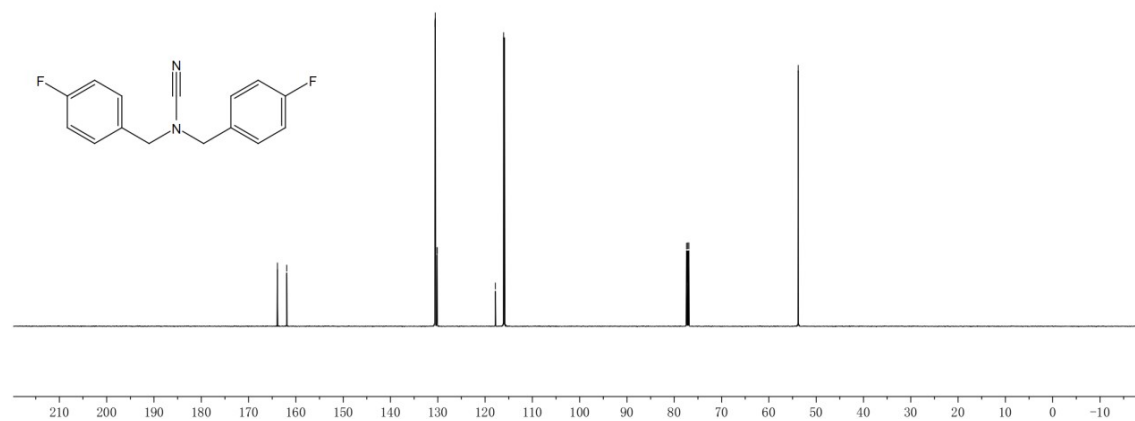

### 3k $^{19}\text{F}$ NMR (500 MHz, $\text{CDCl}_3$ )

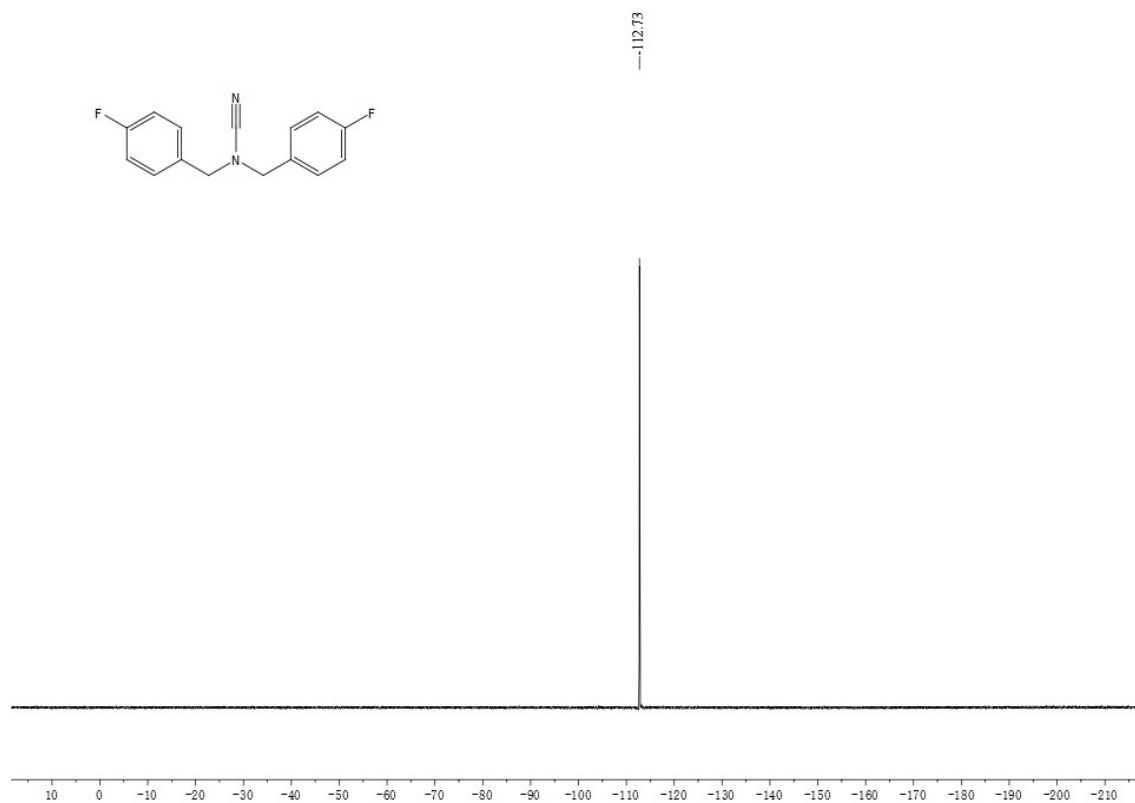

### 31 <sup>1</sup>H NMR (500 MHz, CDCl<sub>3</sub>)

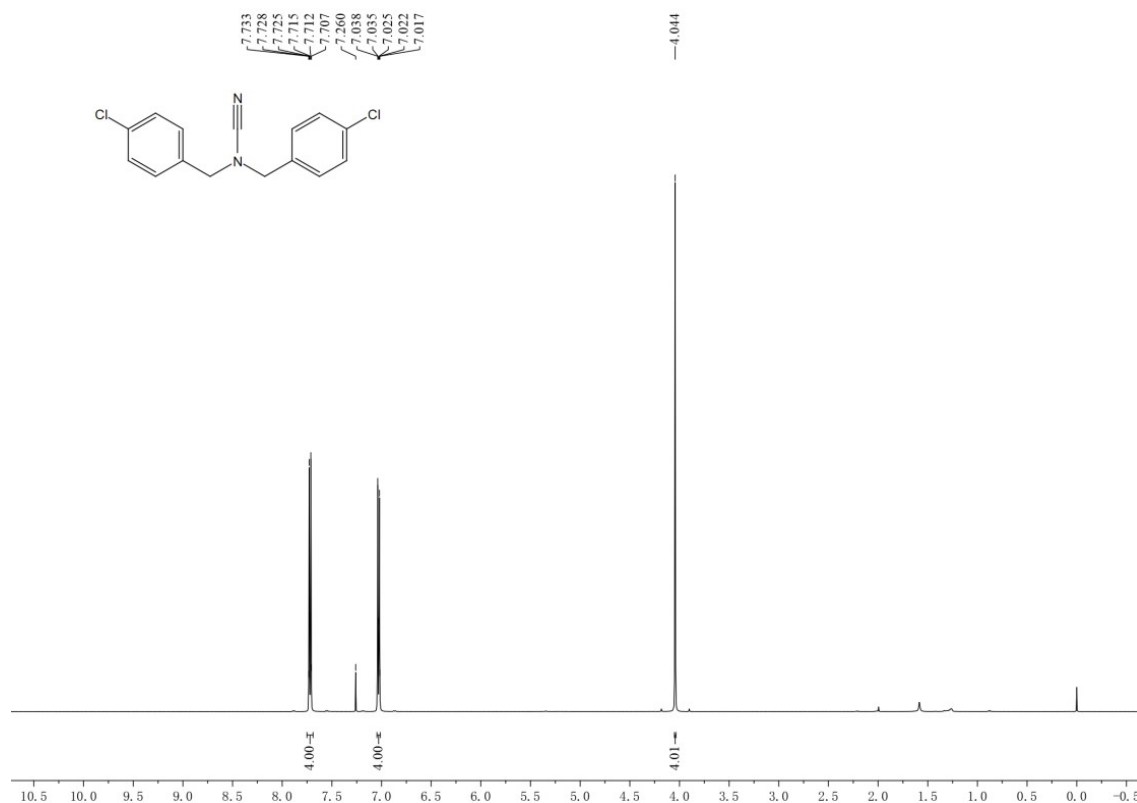

### 31 <sup>13</sup>C NMR (126 MHz, CDCl<sub>3</sub>)

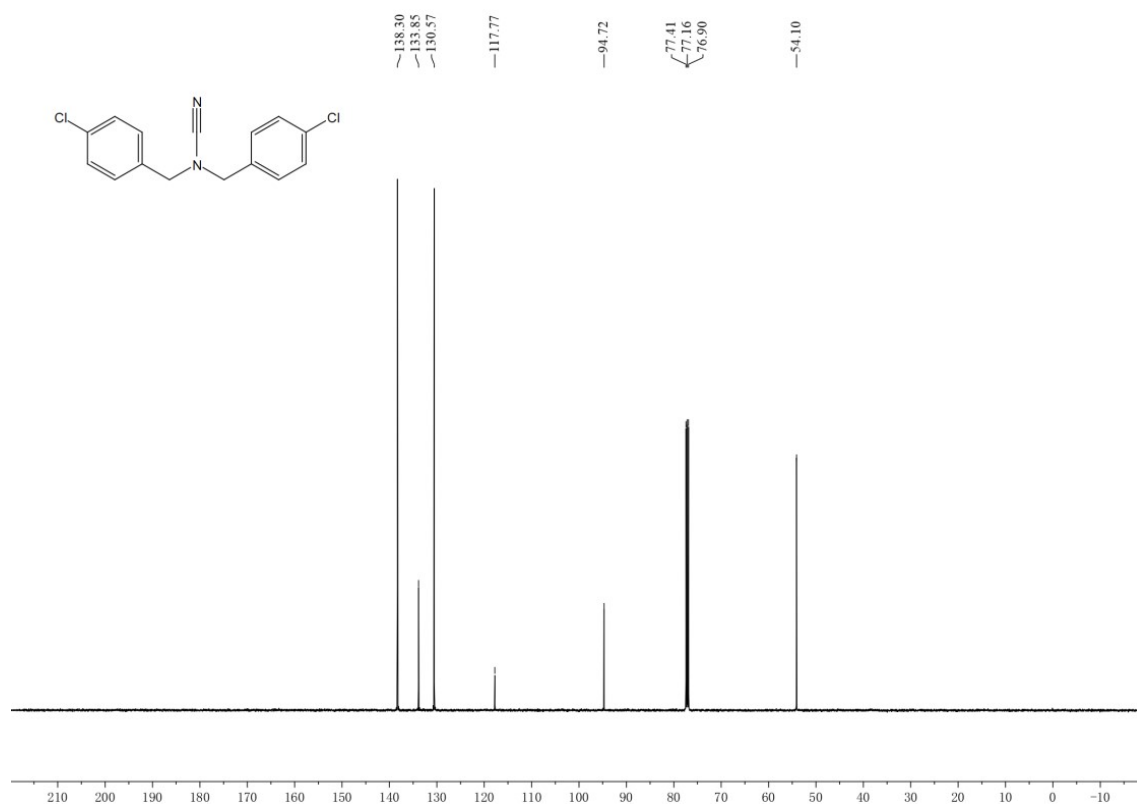

### 3m $^1\text{H}$ NMR (500 MHz, $\text{CDCl}_3$ )

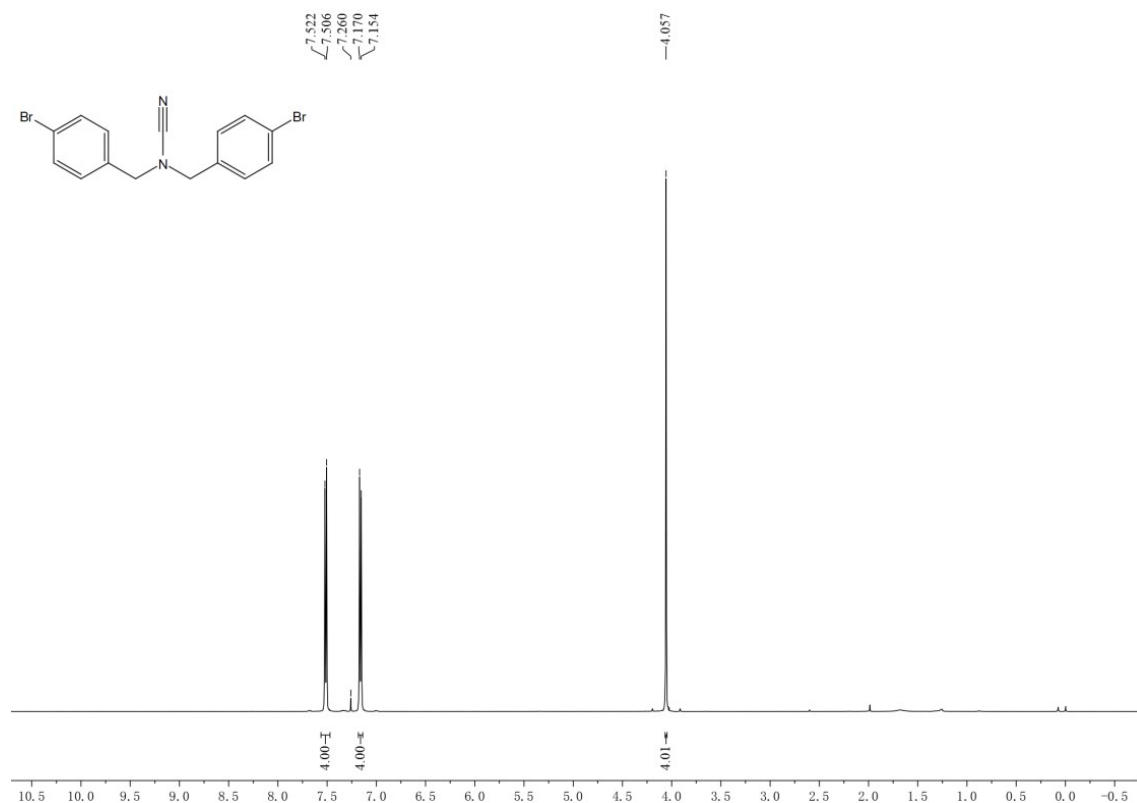

### 3m $^{13}\text{C}$ NMR (126 MHz, $\text{CDCl}_3$ )

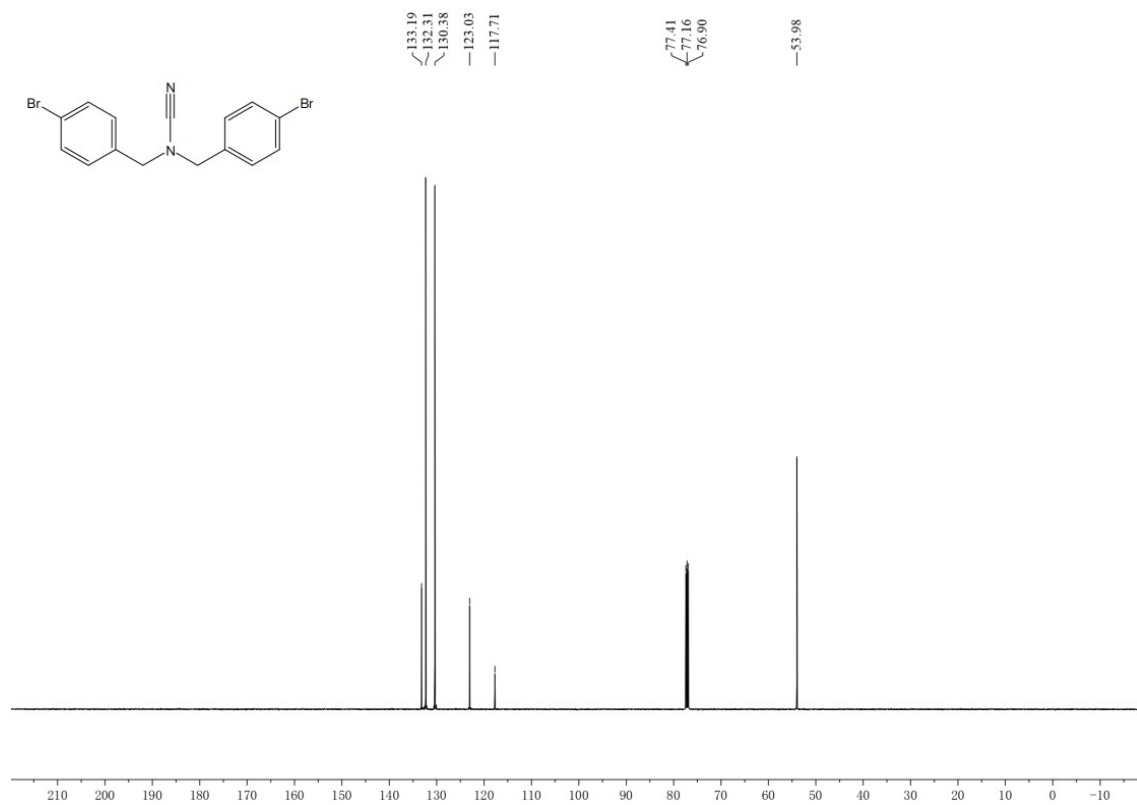



### 3n <sup>1</sup>H NMR (500 MHz, CDCl<sub>3</sub>)

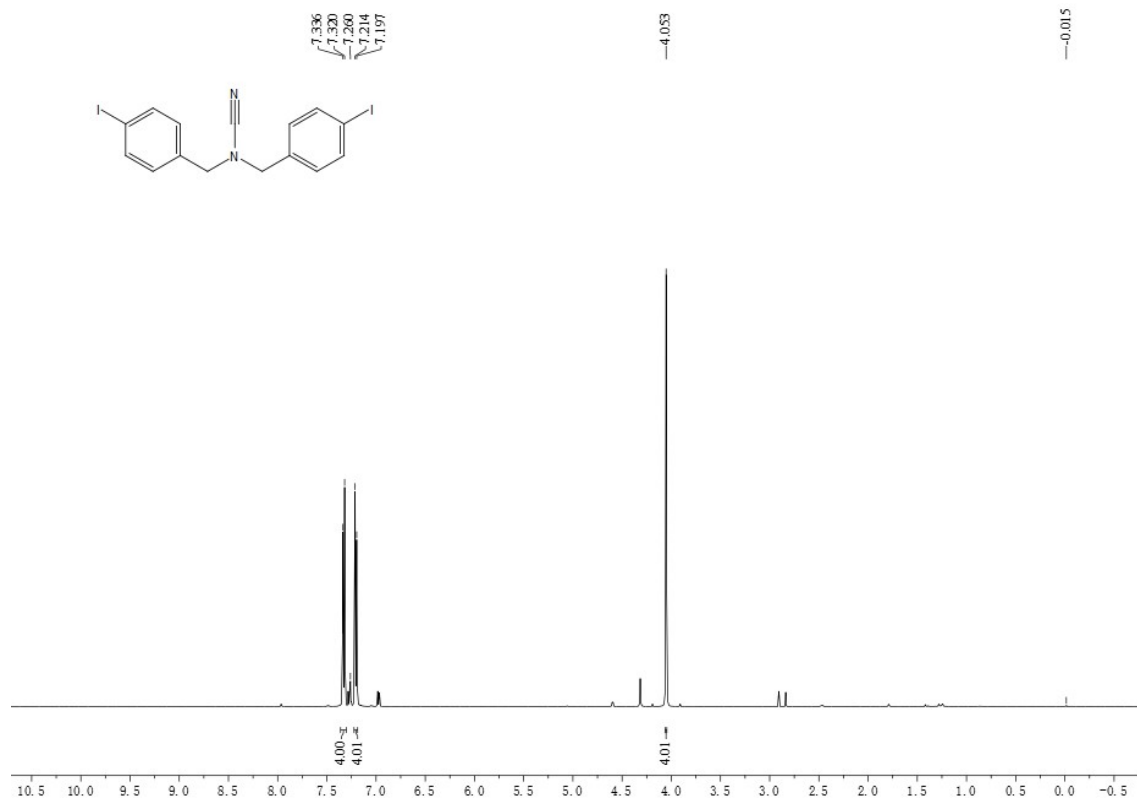

### 3n <sup>13</sup>C NMR (126 MHz, CDCl<sub>3</sub>)

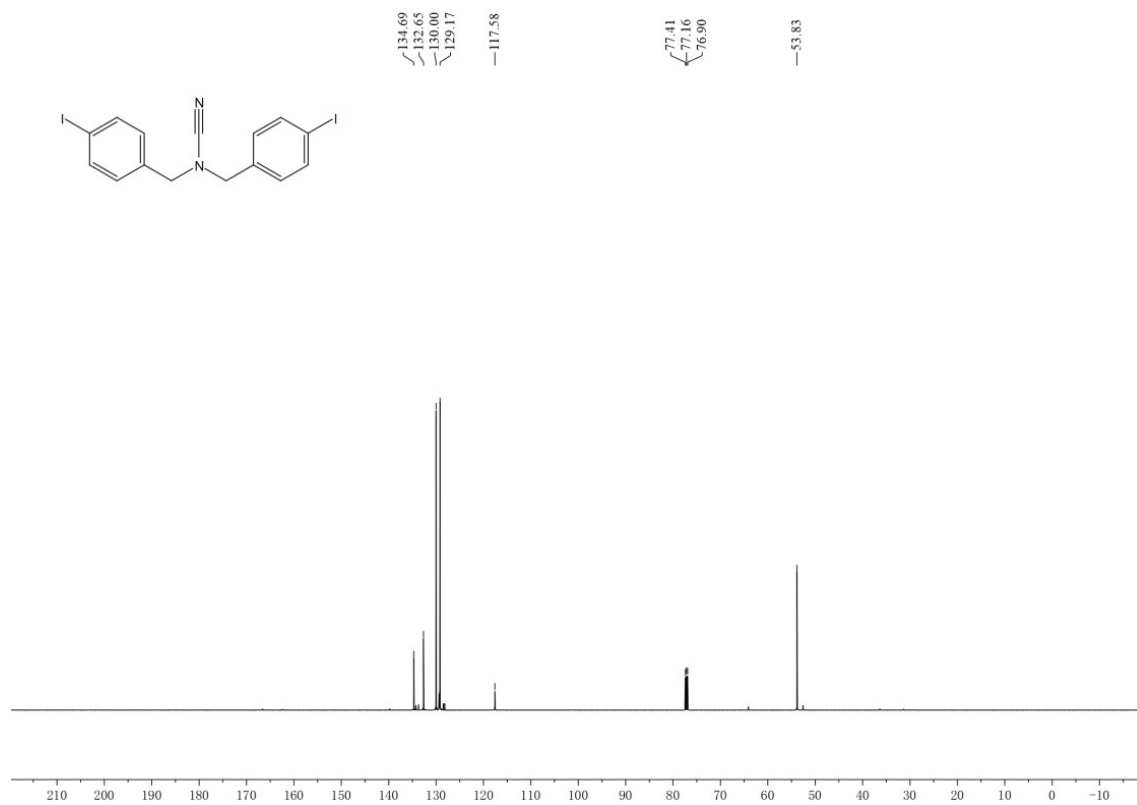

### 3o <sup>1</sup>H NMR (500 MHz, CDCl<sub>3</sub>)

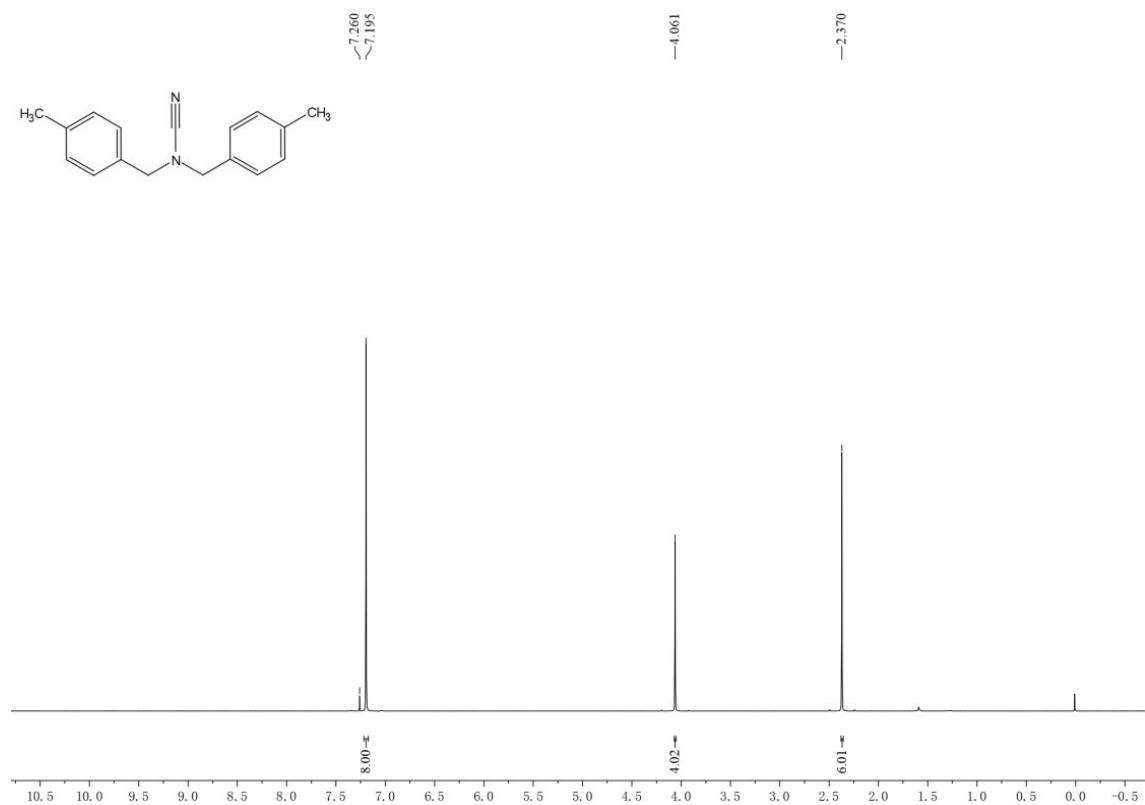

### 3o <sup>13</sup>C NMR (126 MHz, CDCl<sub>3</sub>)

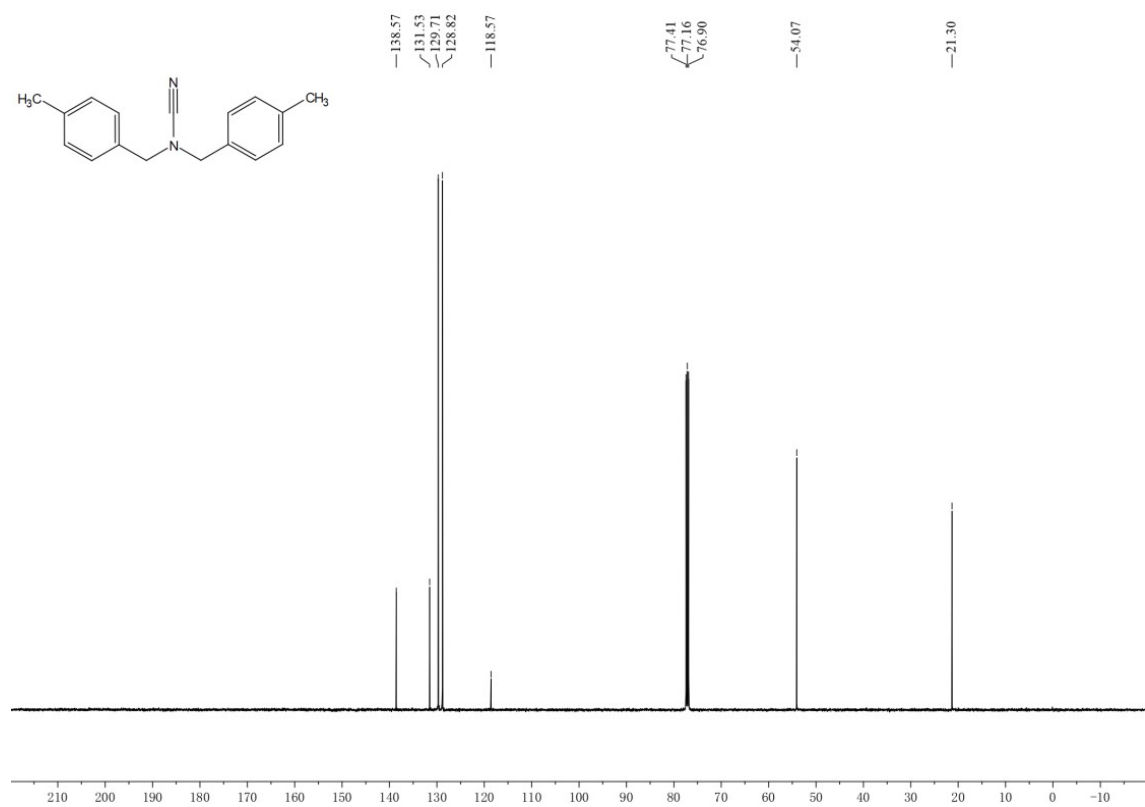

### 3p $^1\text{H}$ NMR (500 MHz, $\text{CDCl}_3$ )

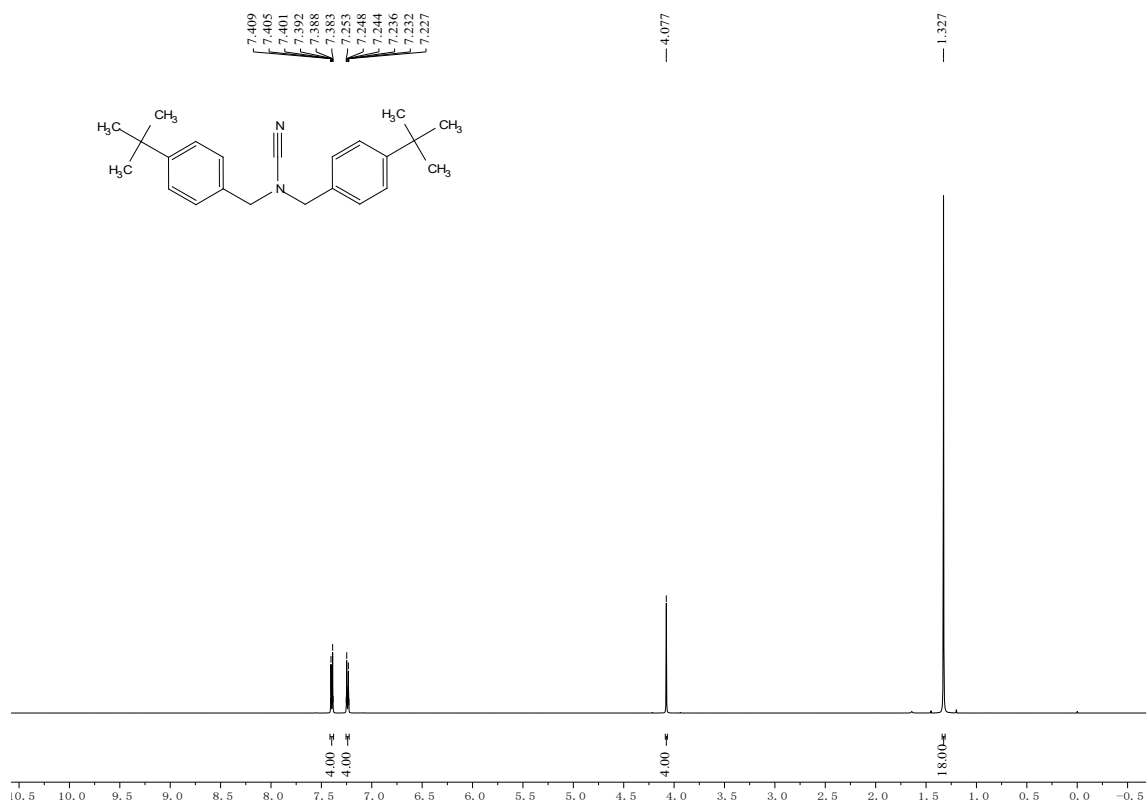

### 3p $^{13}\text{C}$ NMR (126 MHz, $\text{CDCl}_3$ )

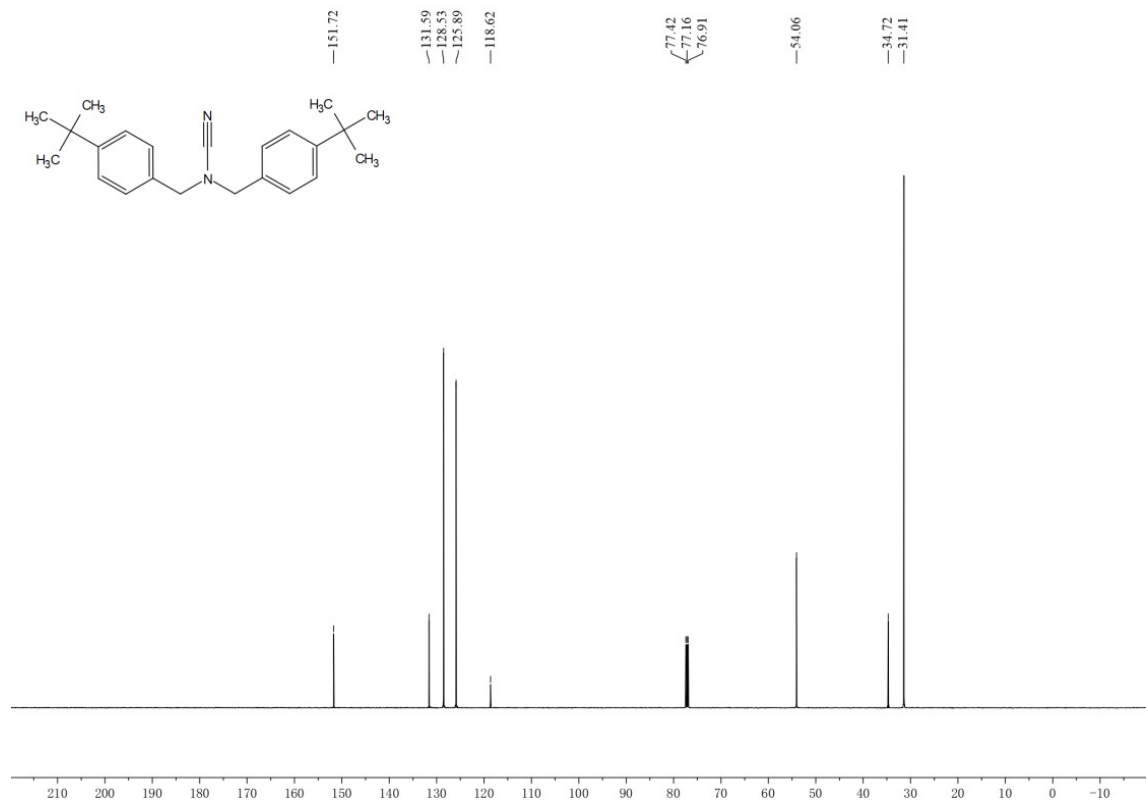

### 3q <sup>1</sup>H NMR (500 MHz, CDCl<sub>3</sub>)

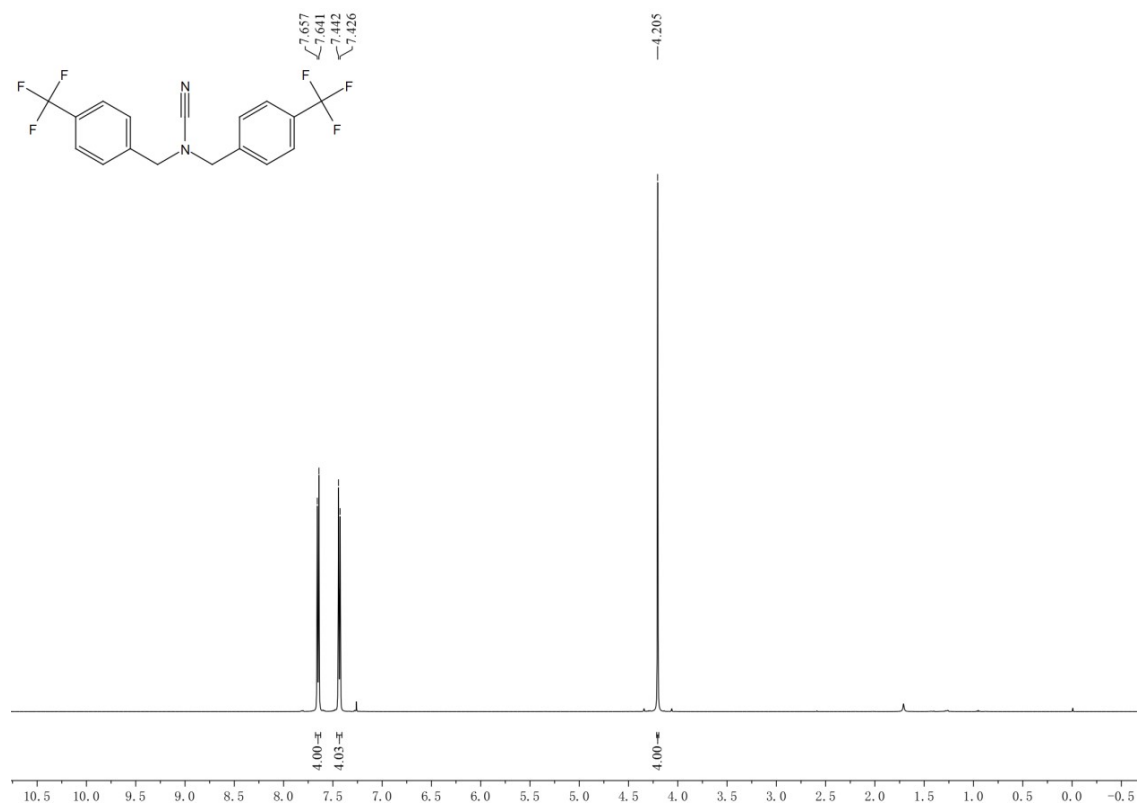

### 3q <sup>13</sup>C NMR (126 MHz, CDCl<sub>3</sub>)

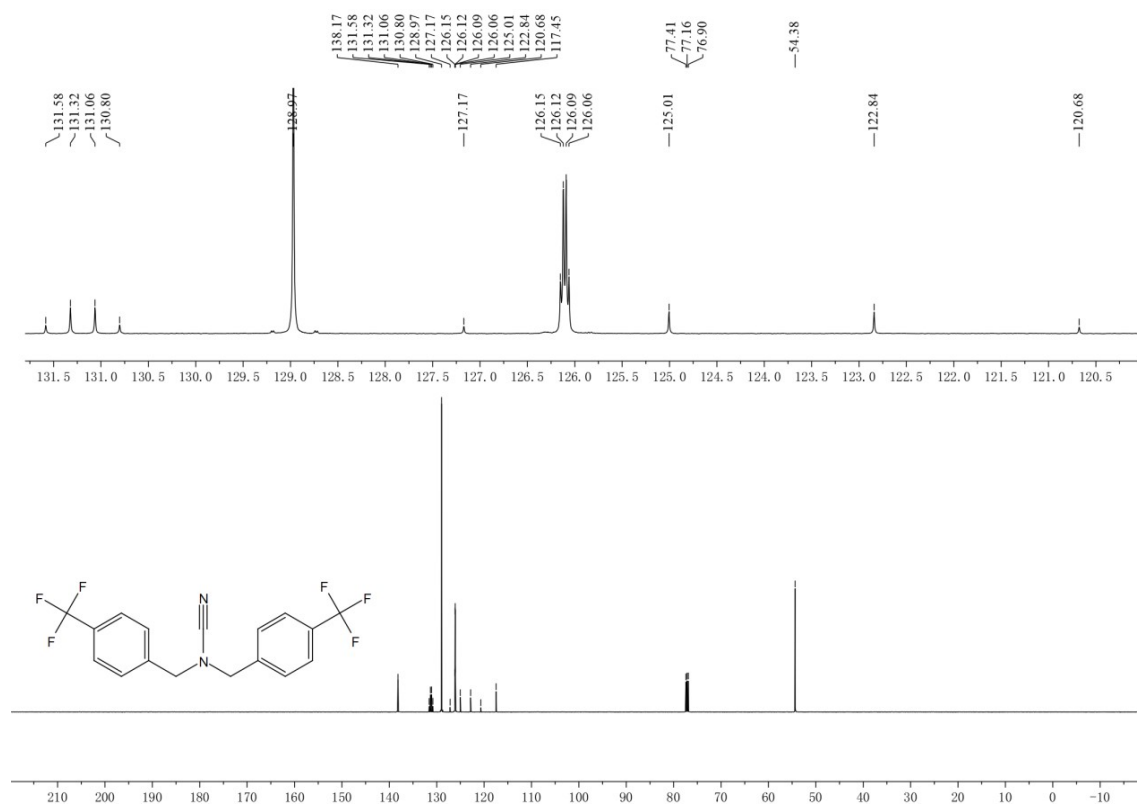

### 3q <sup>19</sup>F NMR (376 MHz, CDCl<sub>3</sub>)

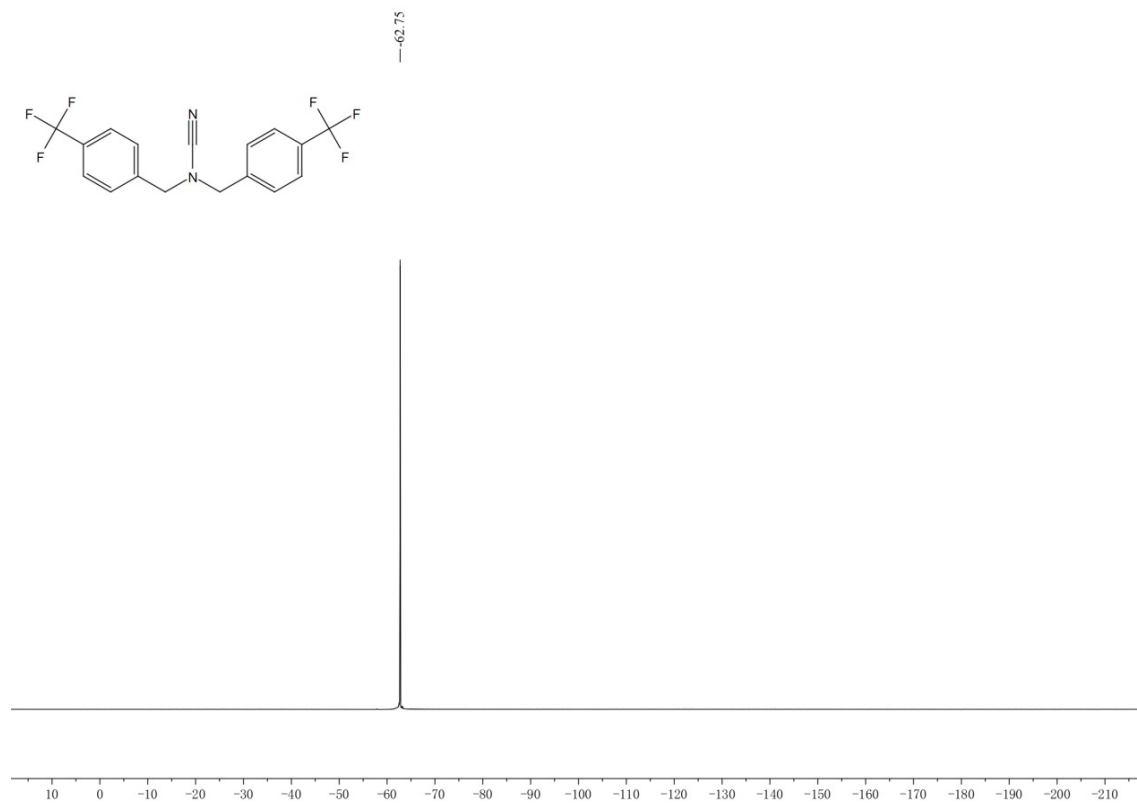

### 3r <sup>1</sup>H NMR (500 MHz, CDCl<sub>3</sub>)

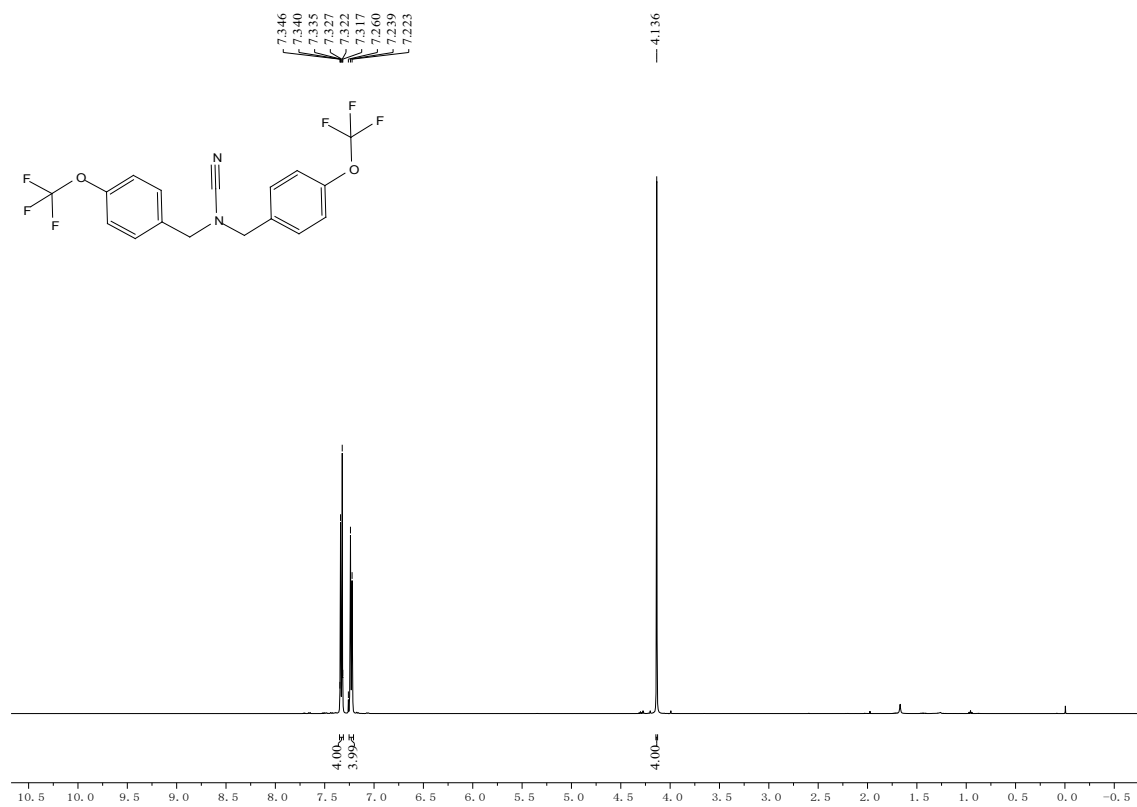

### 3r <sup>13</sup>C NMR (126 MHz, CDCl<sub>3</sub>)

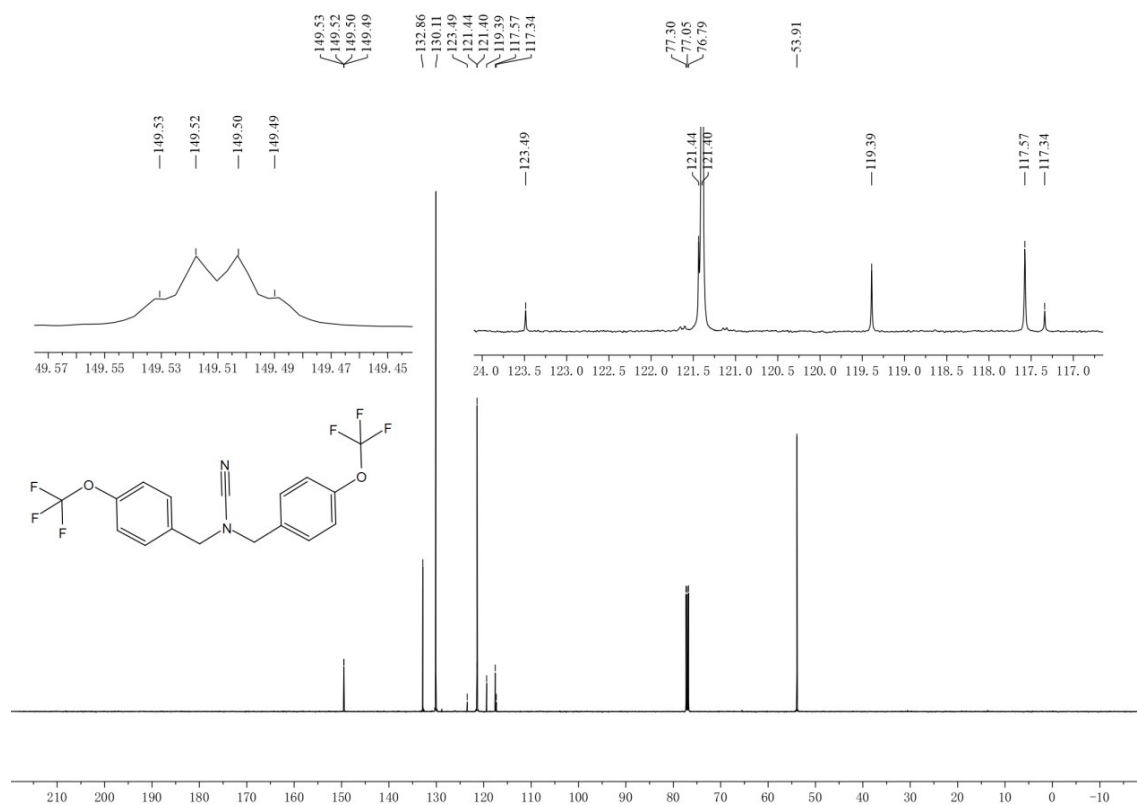

### 3r <sup>19</sup>F NMR (376 MHz, CDCl<sub>3</sub>)

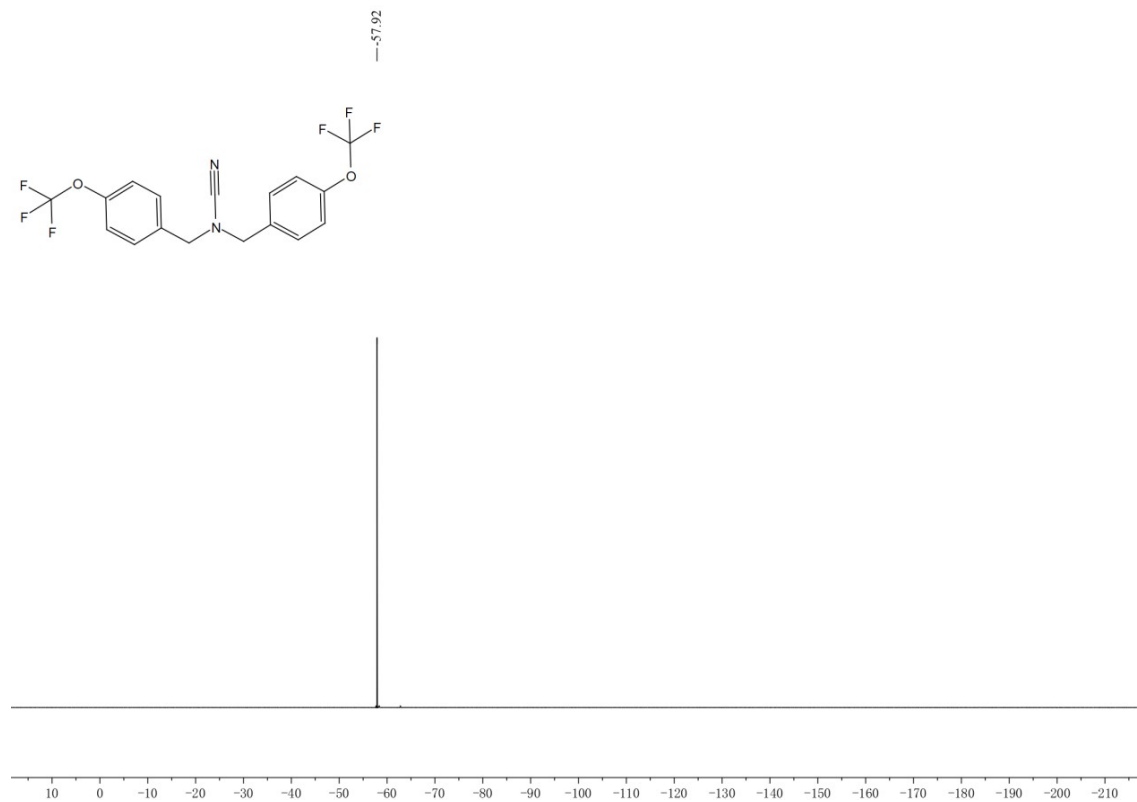

### 3s $^1\text{H}$ NMR (500 MHz, $\text{CDCl}_3$ )

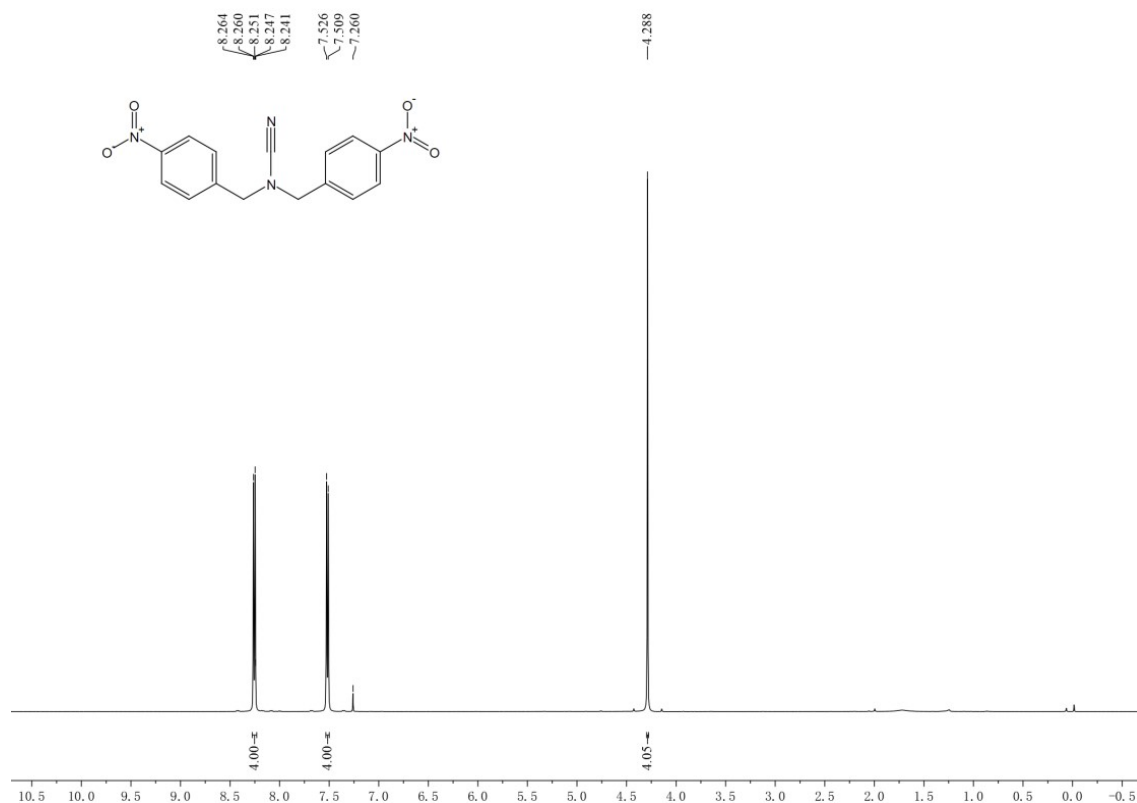

### 3s $^{13}\text{C}$ NMR (126 MHz, $\text{CDCl}_3$ )

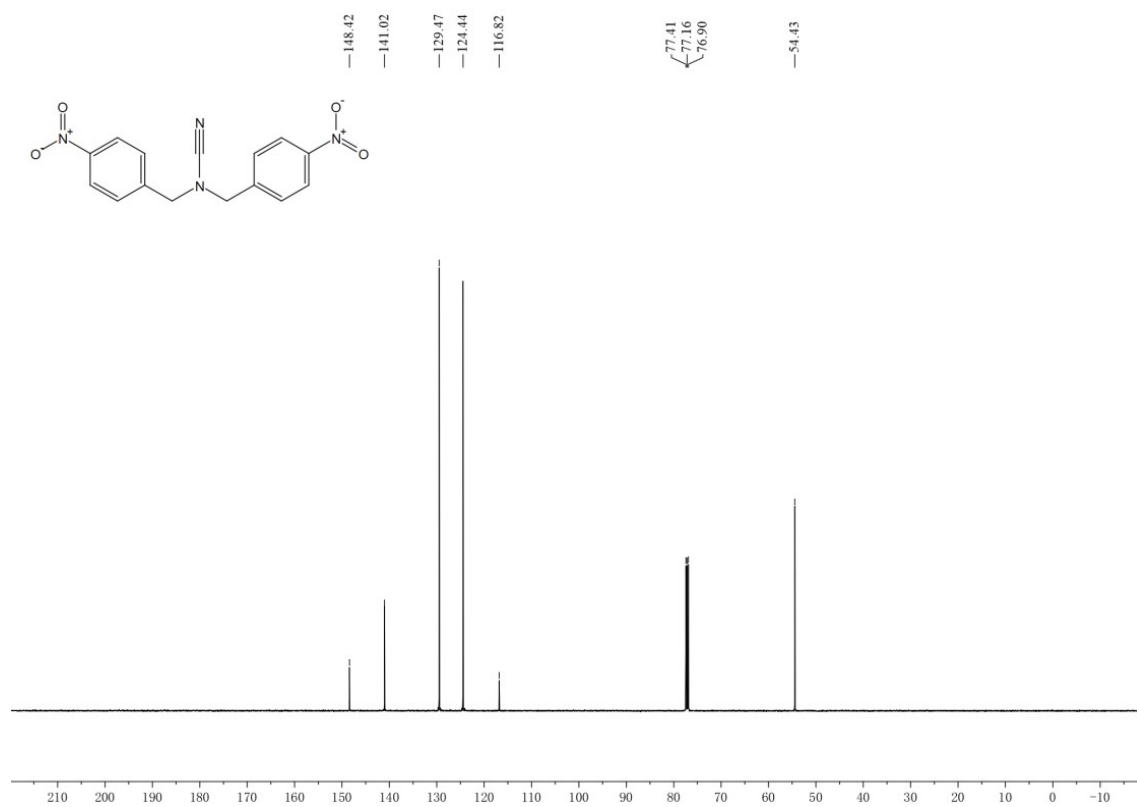

### 3t <sup>1</sup>H NMR (500 MHz, CDCl<sub>3</sub>)

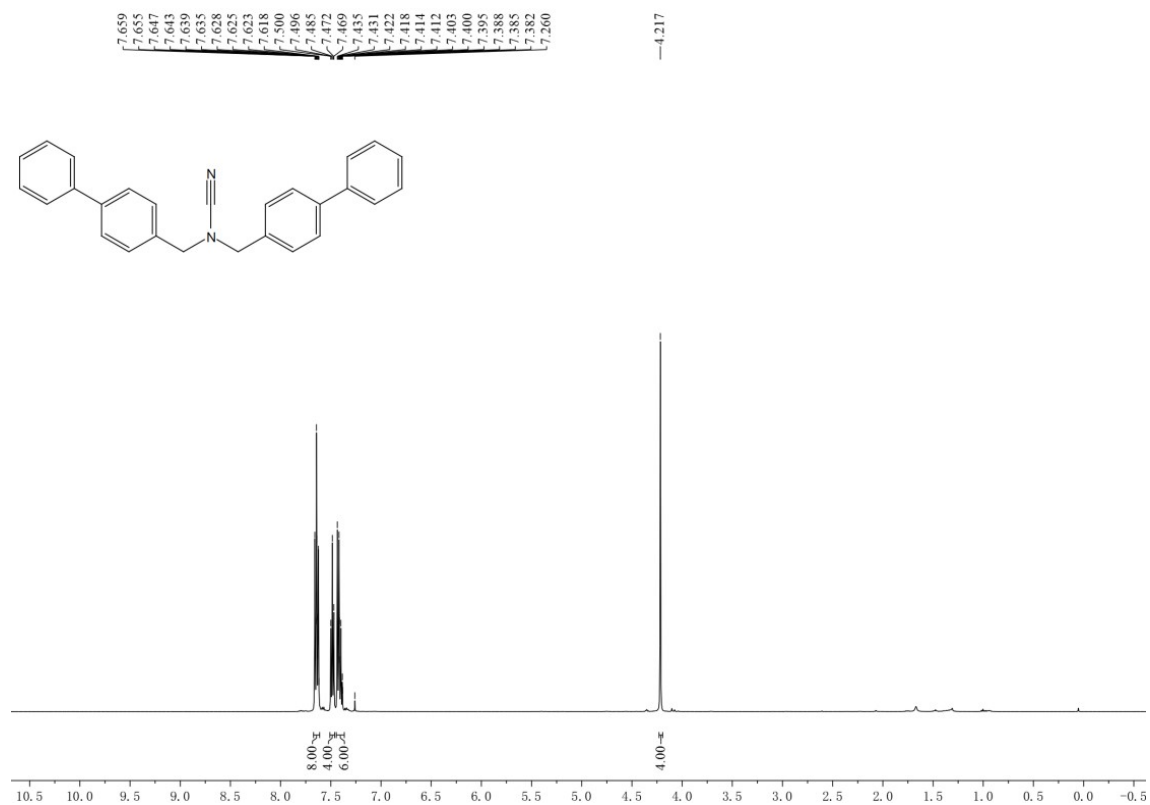

### 3t <sup>13</sup>C NMR (126 MHz, CDCl<sub>3</sub>)

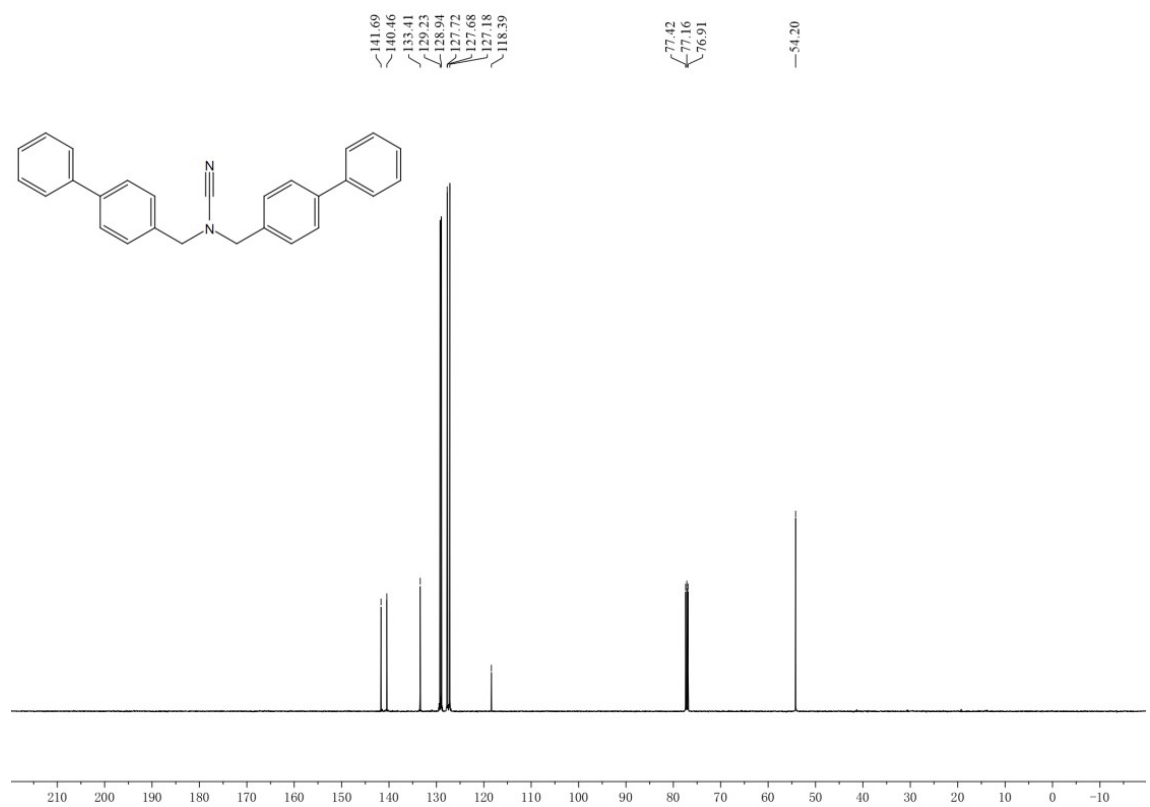



### 4a <sup>1</sup>H NMR (500 MHz, CDCl<sub>3</sub>)

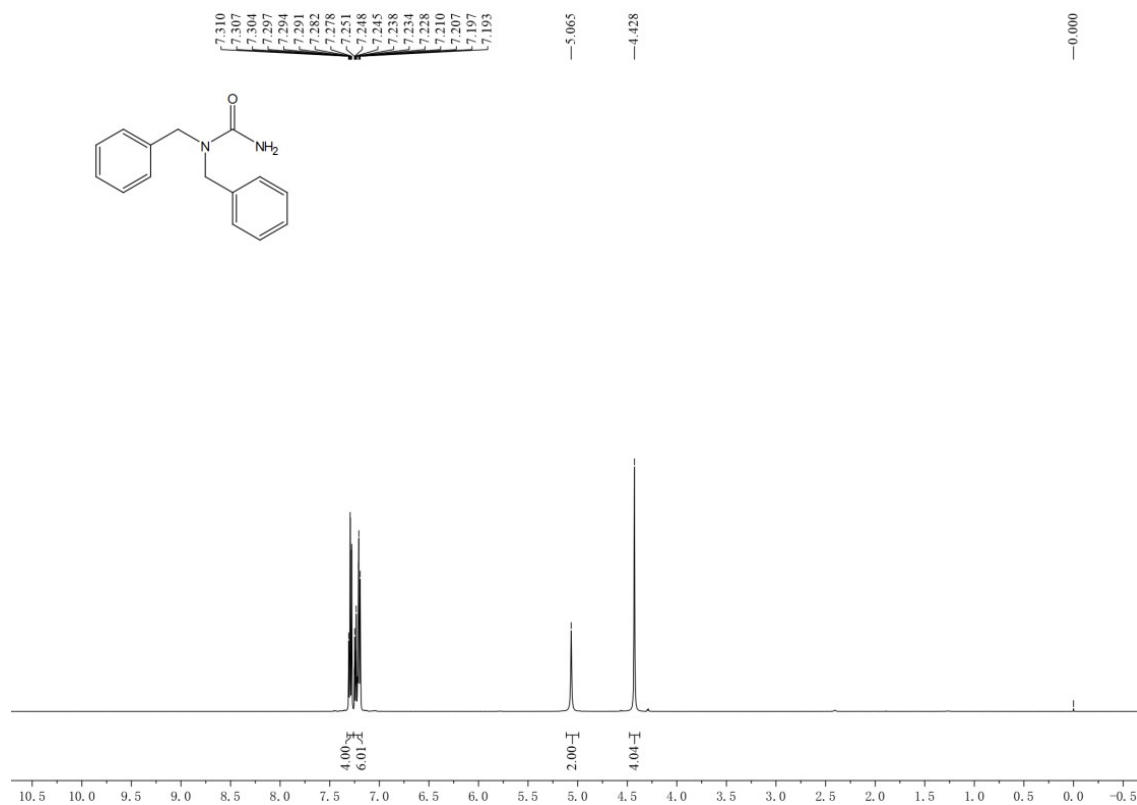

### 4a <sup>13</sup>C NMR (126 MHz, CDCl<sub>3</sub>)

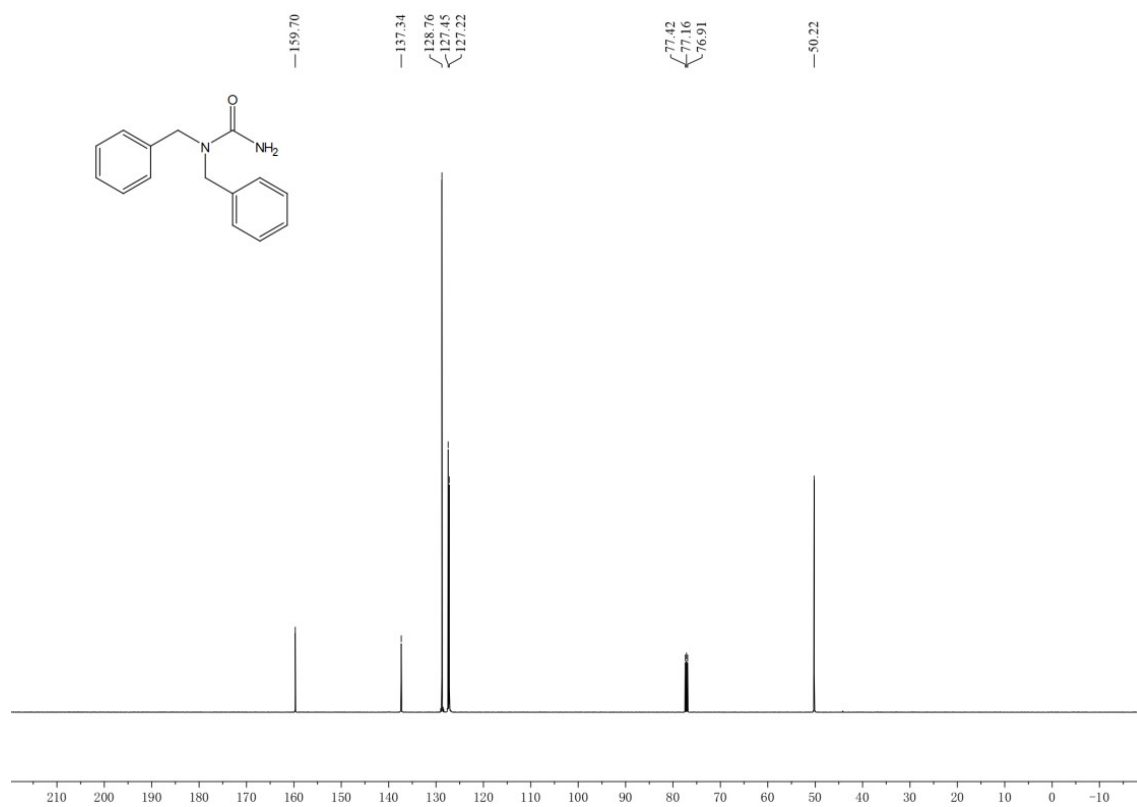



# 4b <sup>13</sup>C NMR (126 MHz, CDCl<sub>3</sub>)

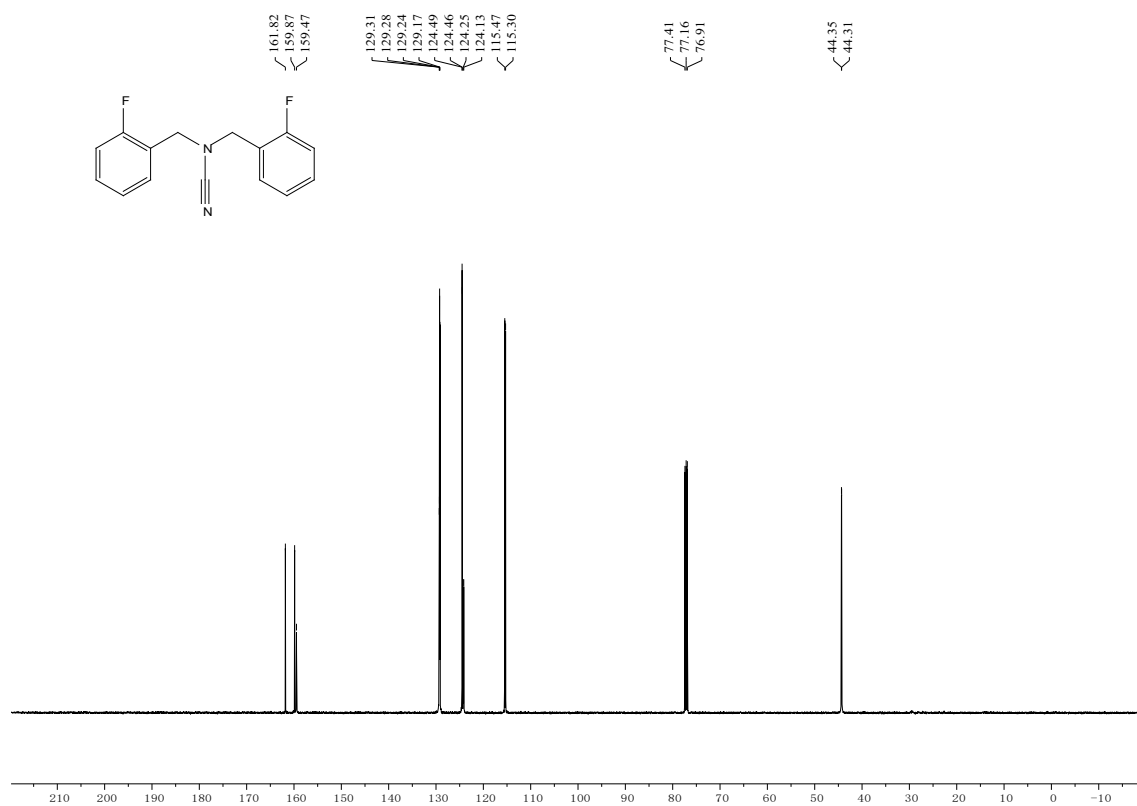

### 4b <sup>19</sup>F NMR (376 MHz, CDCl<sub>3</sub>)

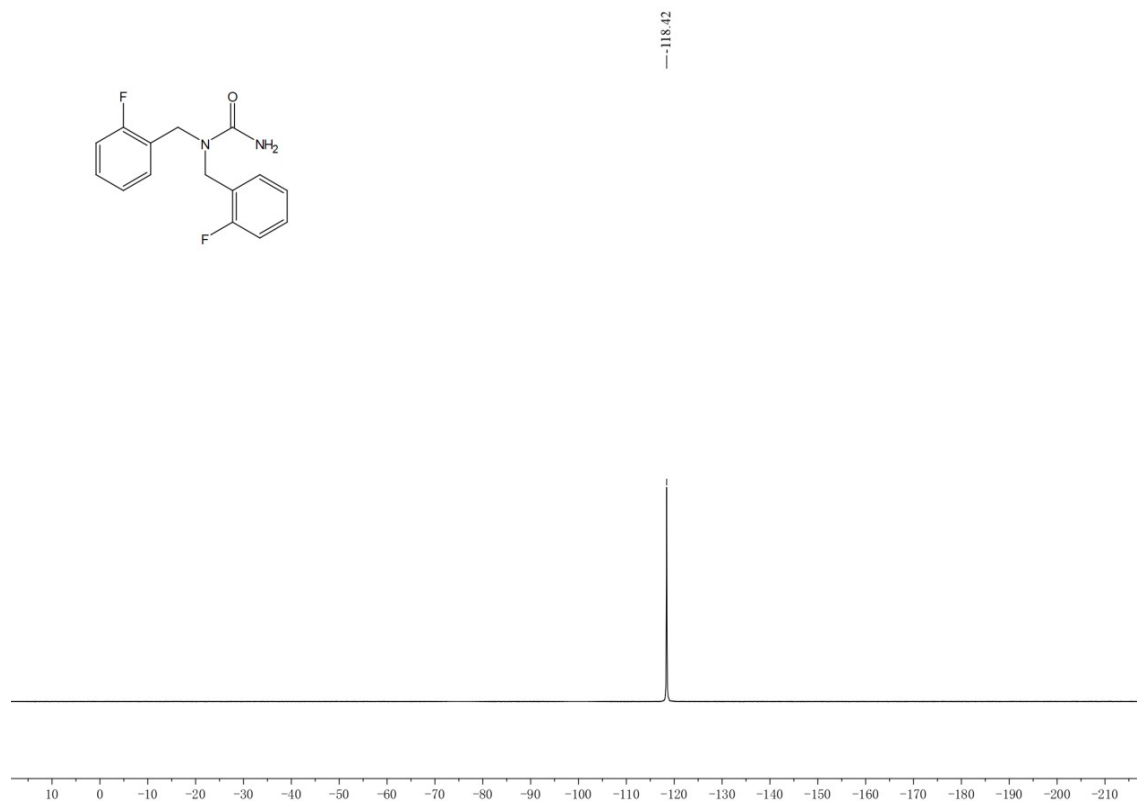

### 4c <sup>1</sup>H NMR (500 MHz, CDCl<sub>3</sub>)

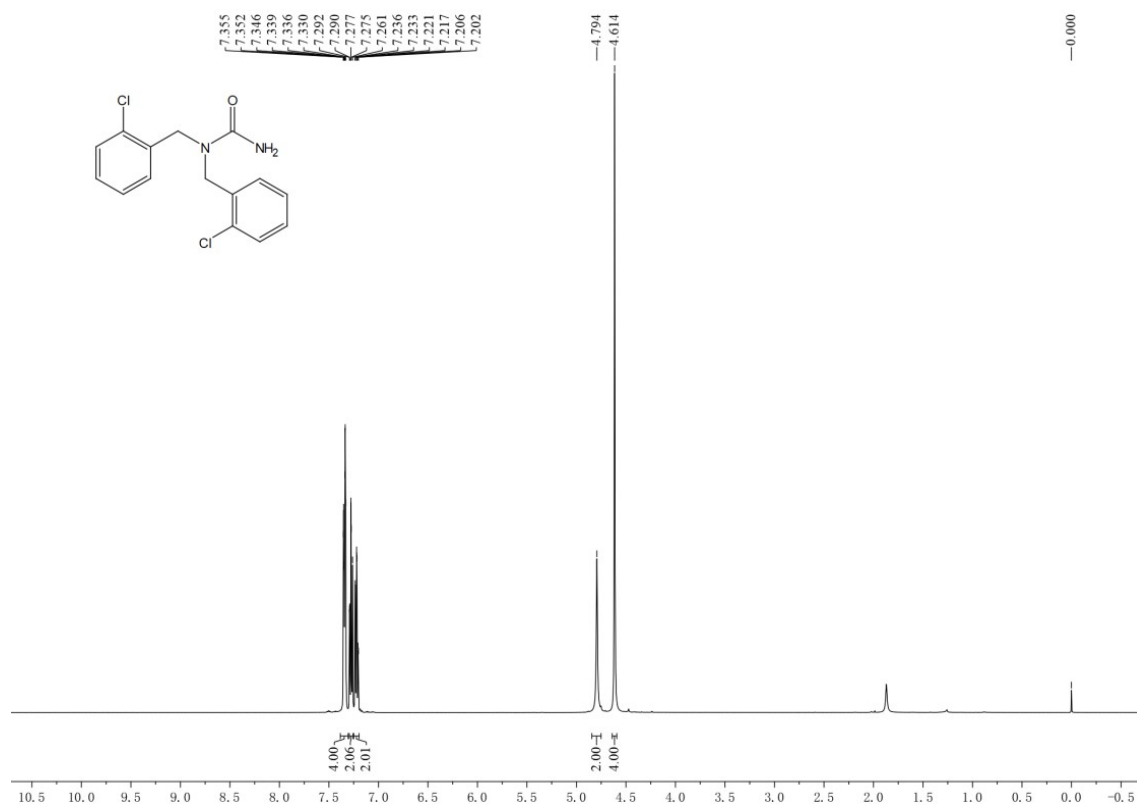

### 4c <sup>13</sup>C NMR (126 MHz, CDCl<sub>3</sub>)

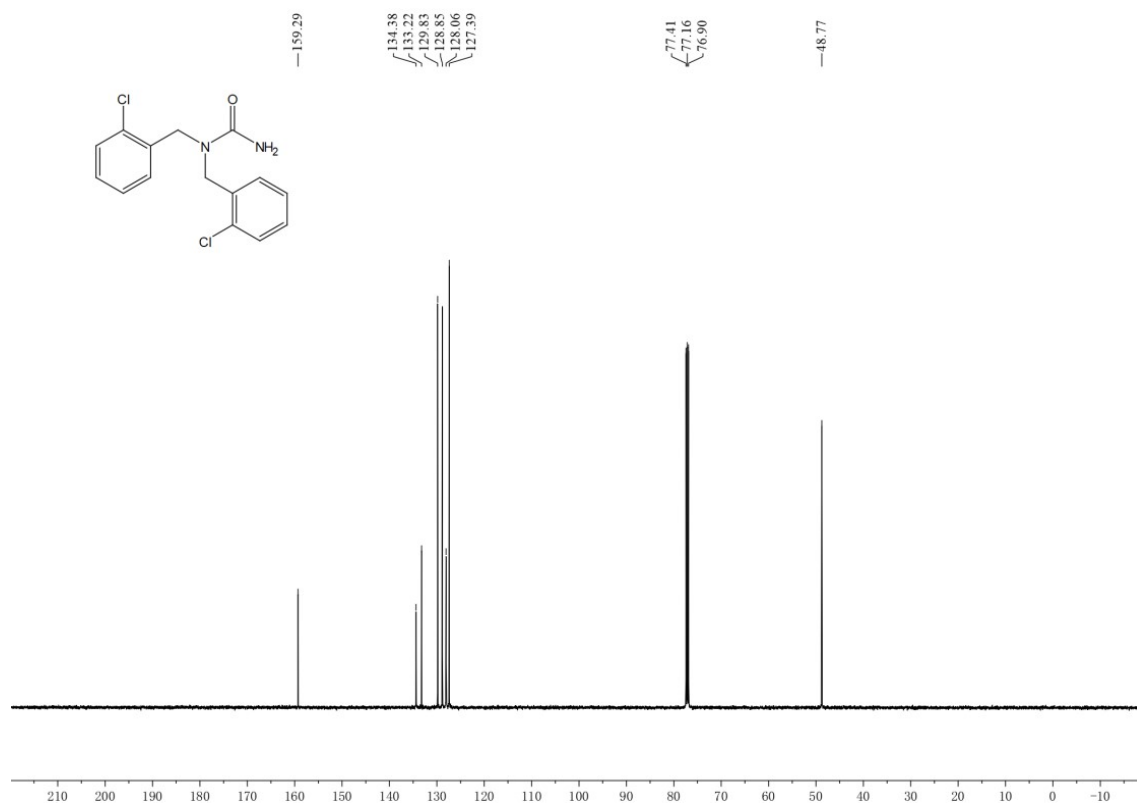

### 4d <sup>1</sup>H NMR (500 MHz, CDCl<sub>3</sub>)

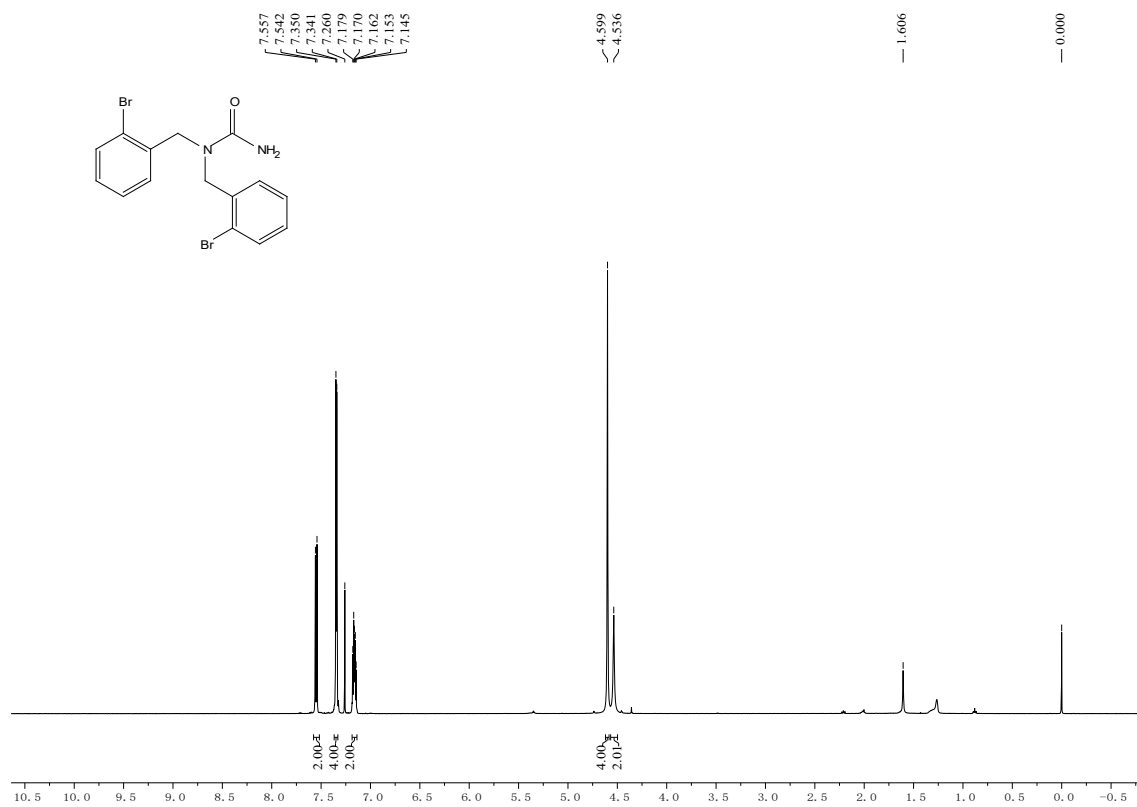

# 4d $^{13}\text{C}$ NMR (126 MHz, $\text{CDCl}_3$ )

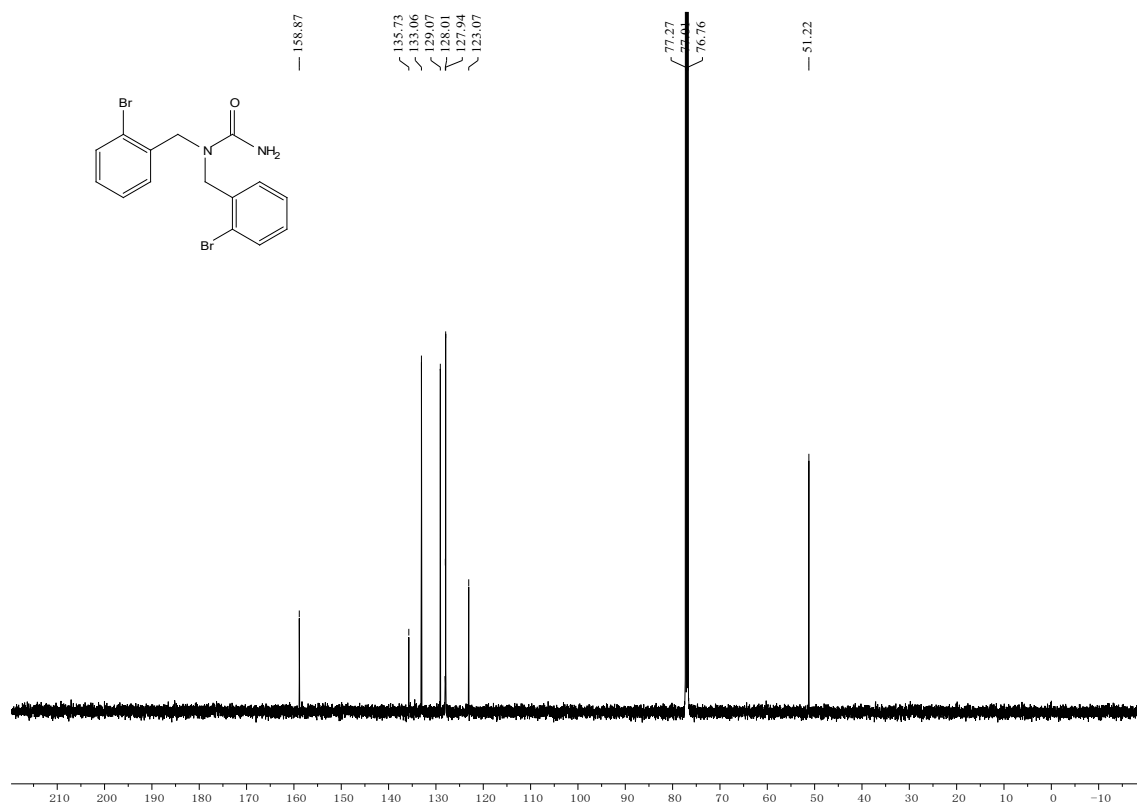

### 4e <sup>1</sup>H NMR (500 MHz, CDCl<sub>3</sub>)

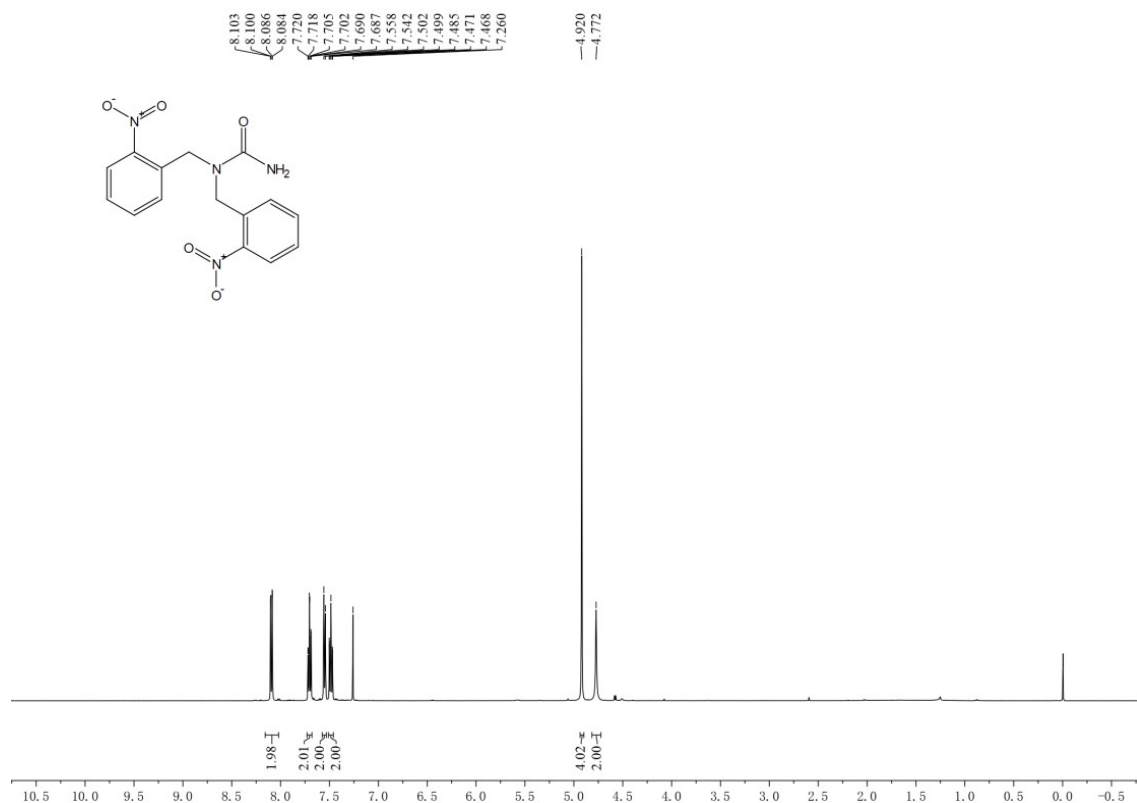

### 4e <sup>13</sup>C NMR (126 MHz, CDCl<sub>3</sub>)

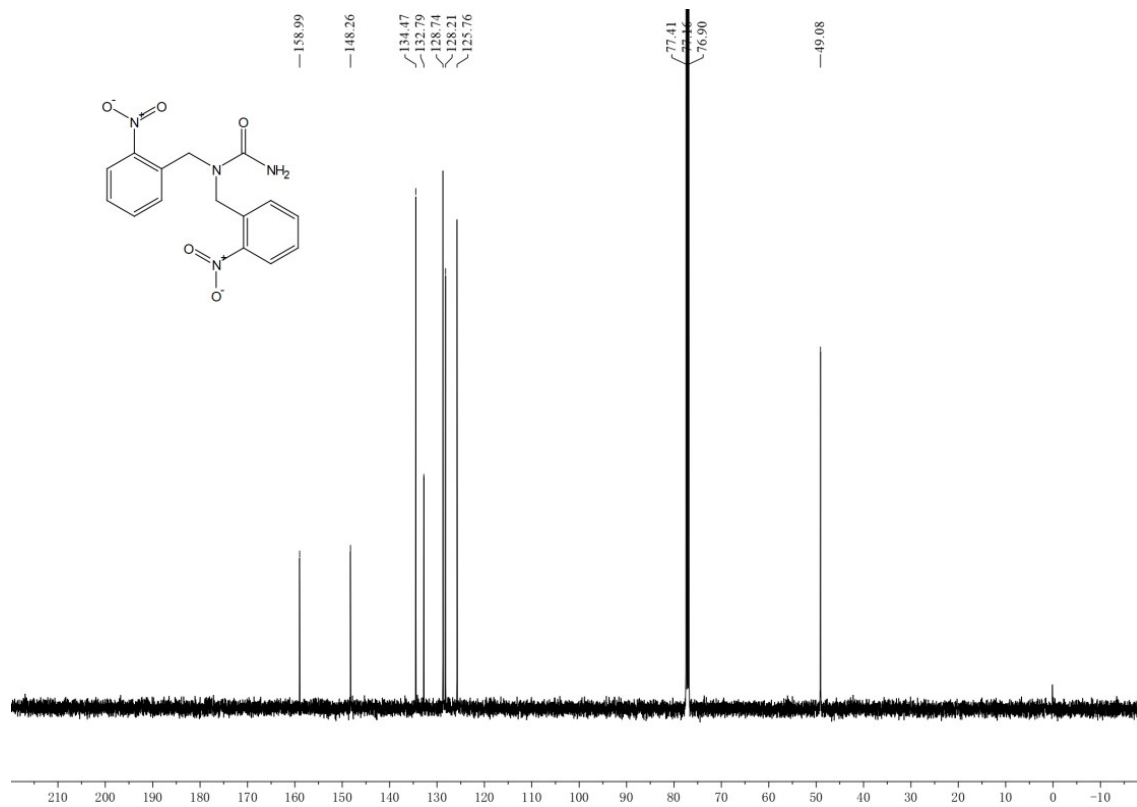

### 4f <sup>1</sup>H NMR (500 MHz, CDCl<sub>3</sub>)

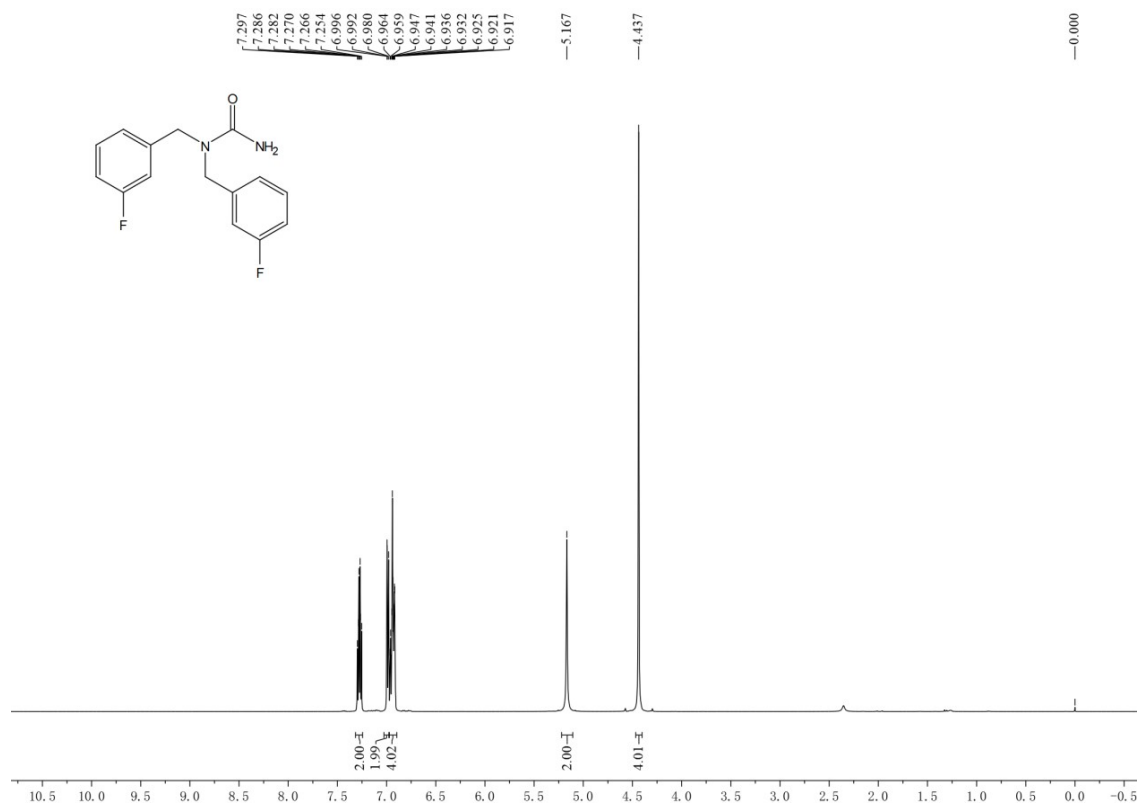

### 4f <sup>13</sup>C NMR (126 MHz, CDCl<sub>3</sub>)

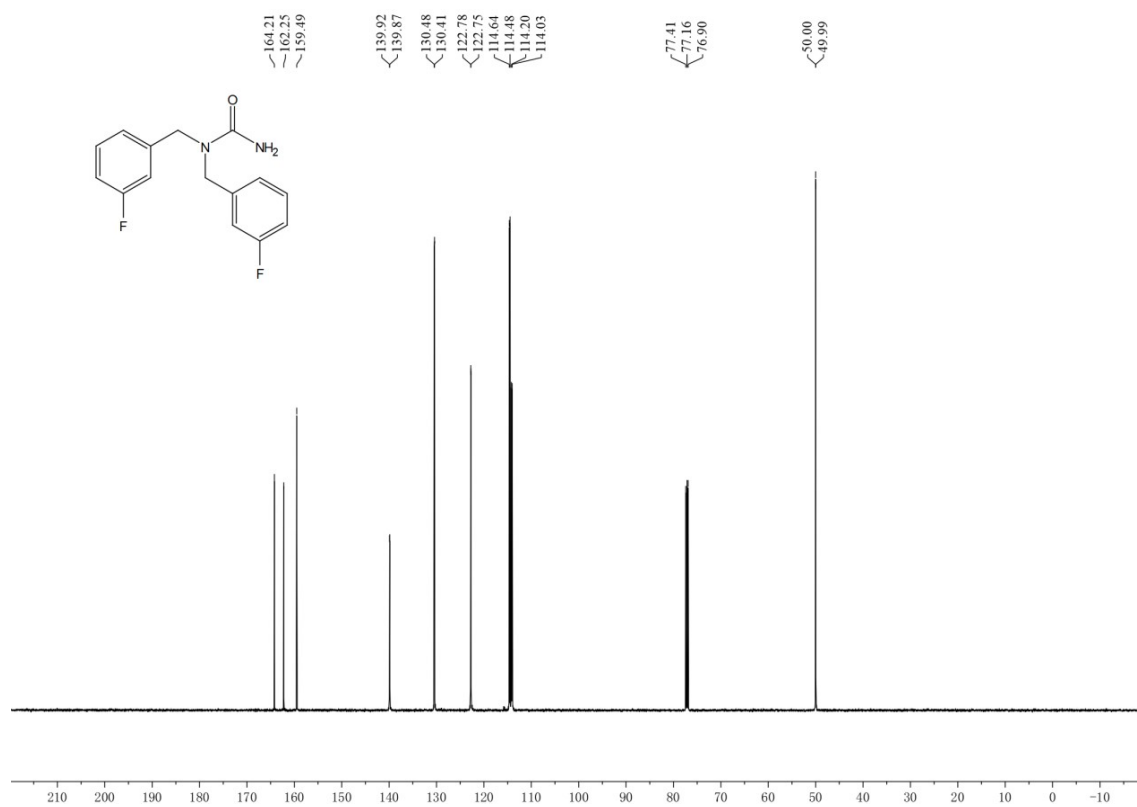



### 4f $^{19}\text{F}$ NMR (376 MHz, $\text{CDCl}_3$ )

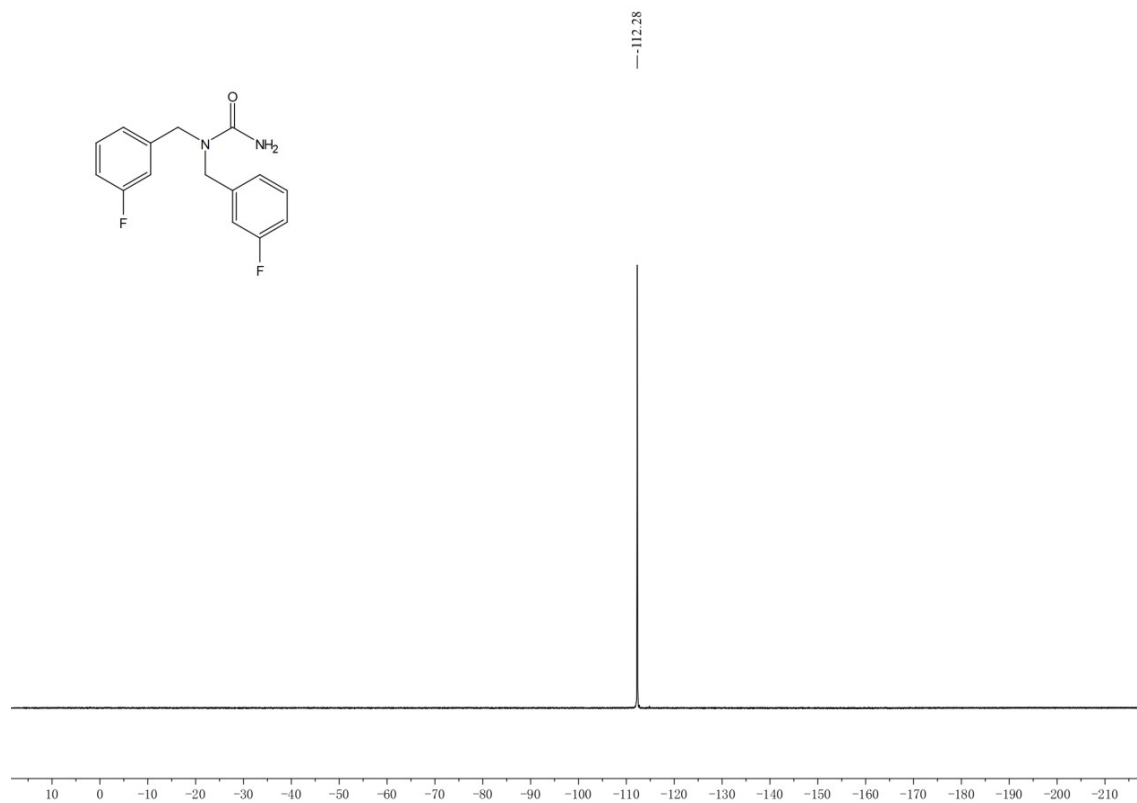

### 4g $^1\text{H}$ NMR (500 MHz, $\text{CDCl}_3$ )

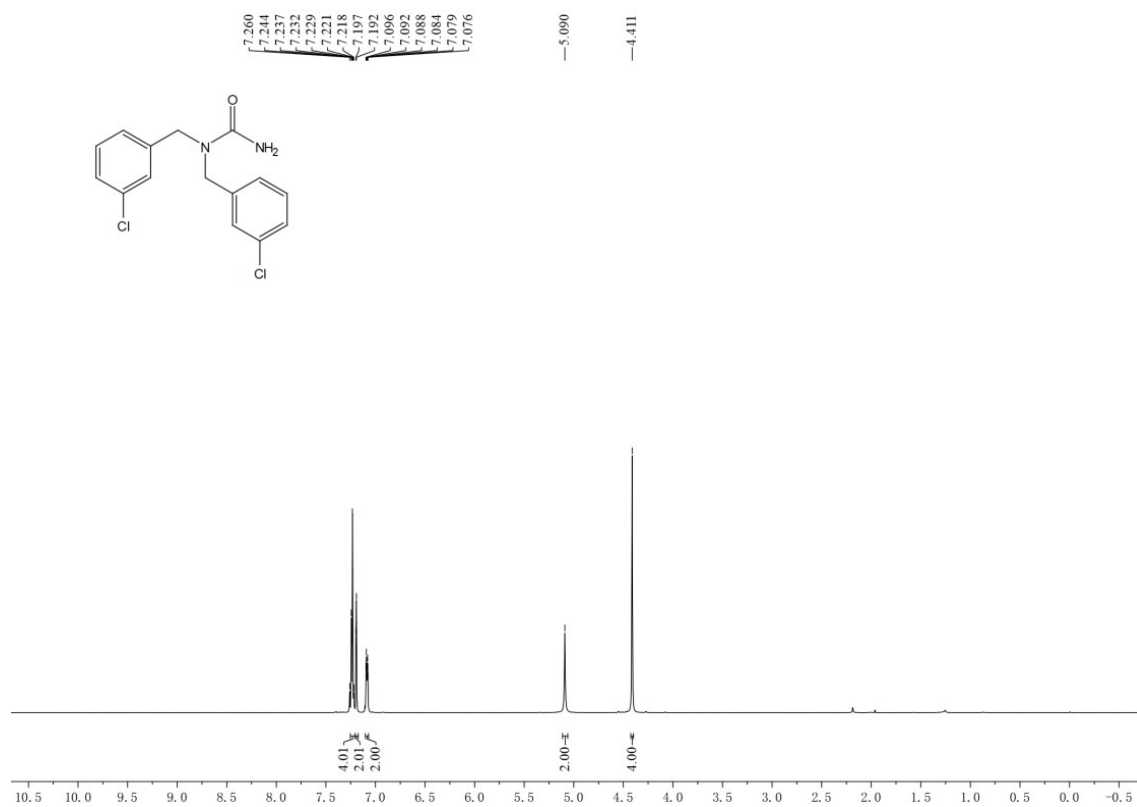

### 4g <sup>13</sup>C NMR (126 MHz, CDCl<sub>3</sub>)

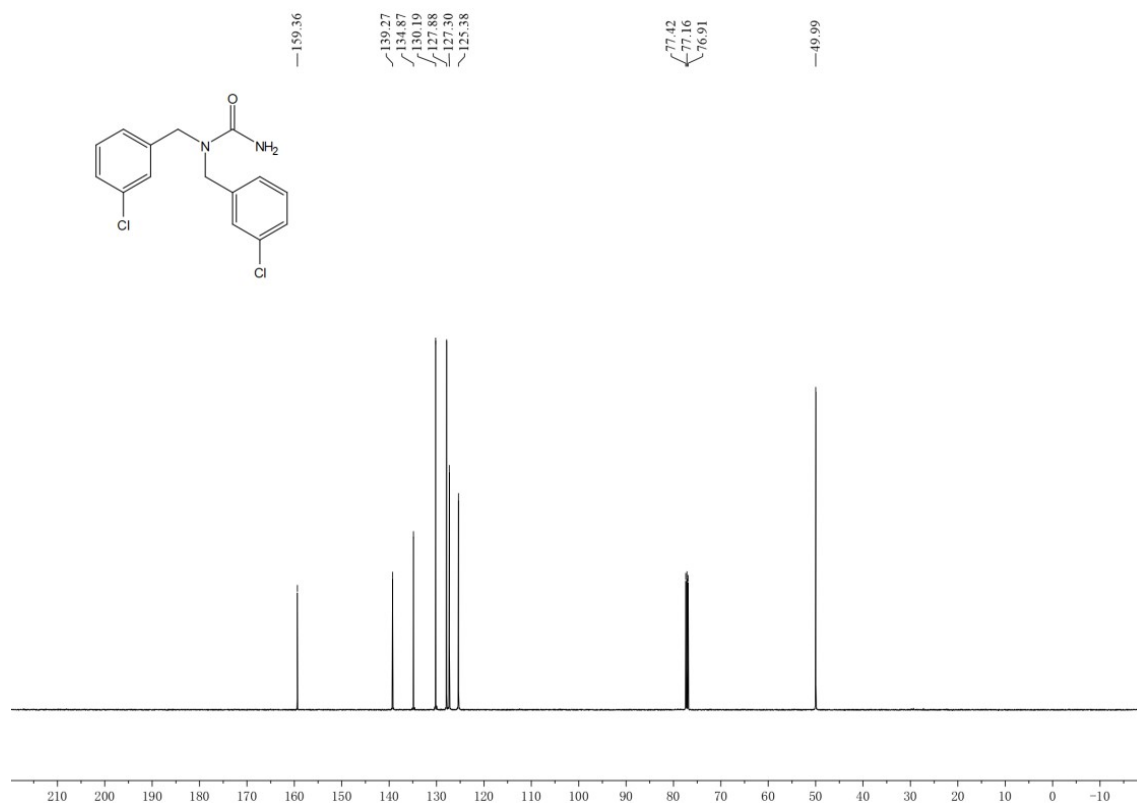

### 4h <sup>1</sup>H NMR (500 MHz, CDCl<sub>3</sub>)

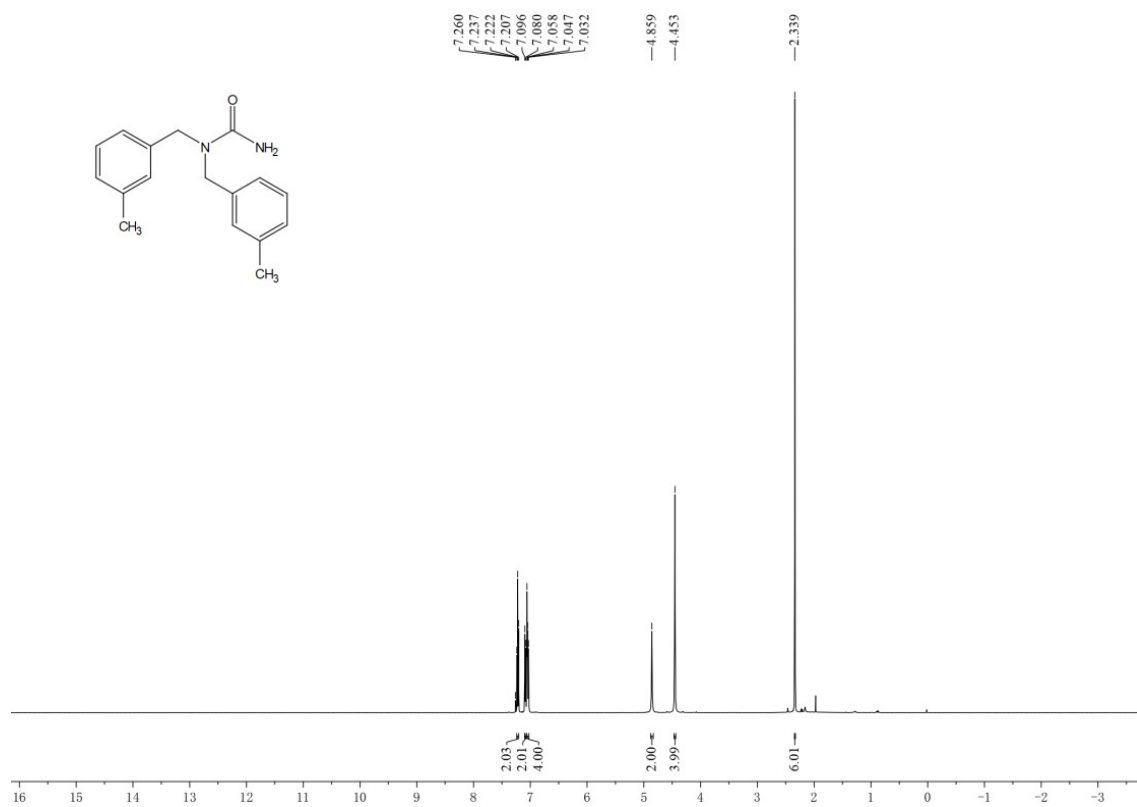

### 4h <sup>13</sup>C NMR (126 MHz, CDCl<sub>3</sub>)

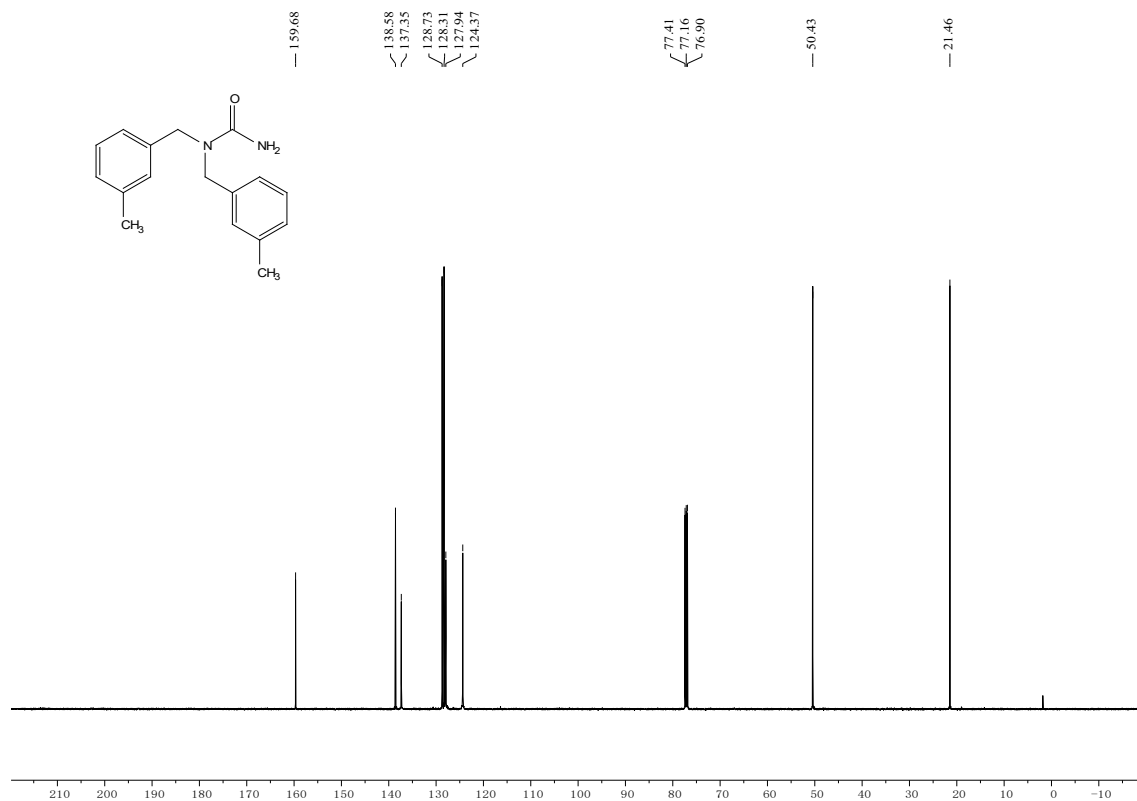

### 4i <sup>1</sup>H NMR (500 MHz, DMSO-*d*<sub>6</sub>)

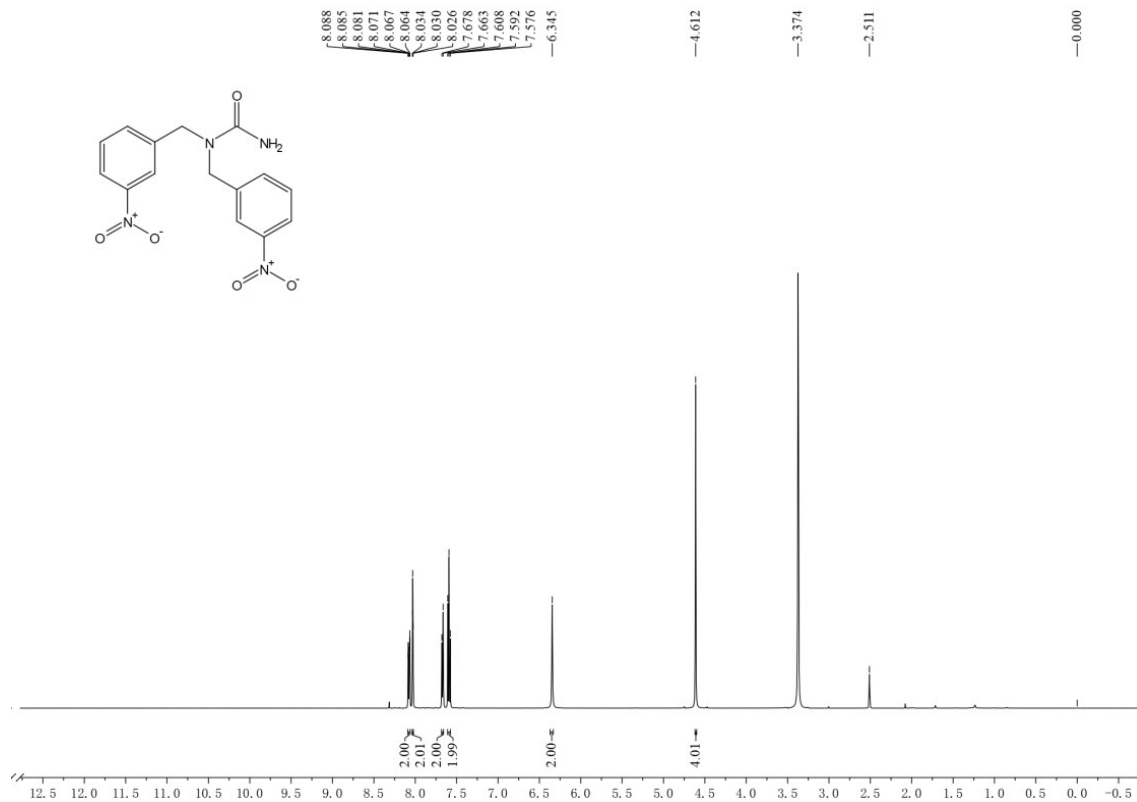

**4i**  $^{13}\text{C}$  NMR (126 MHz,  $\text{DMSO-}d_6$ )

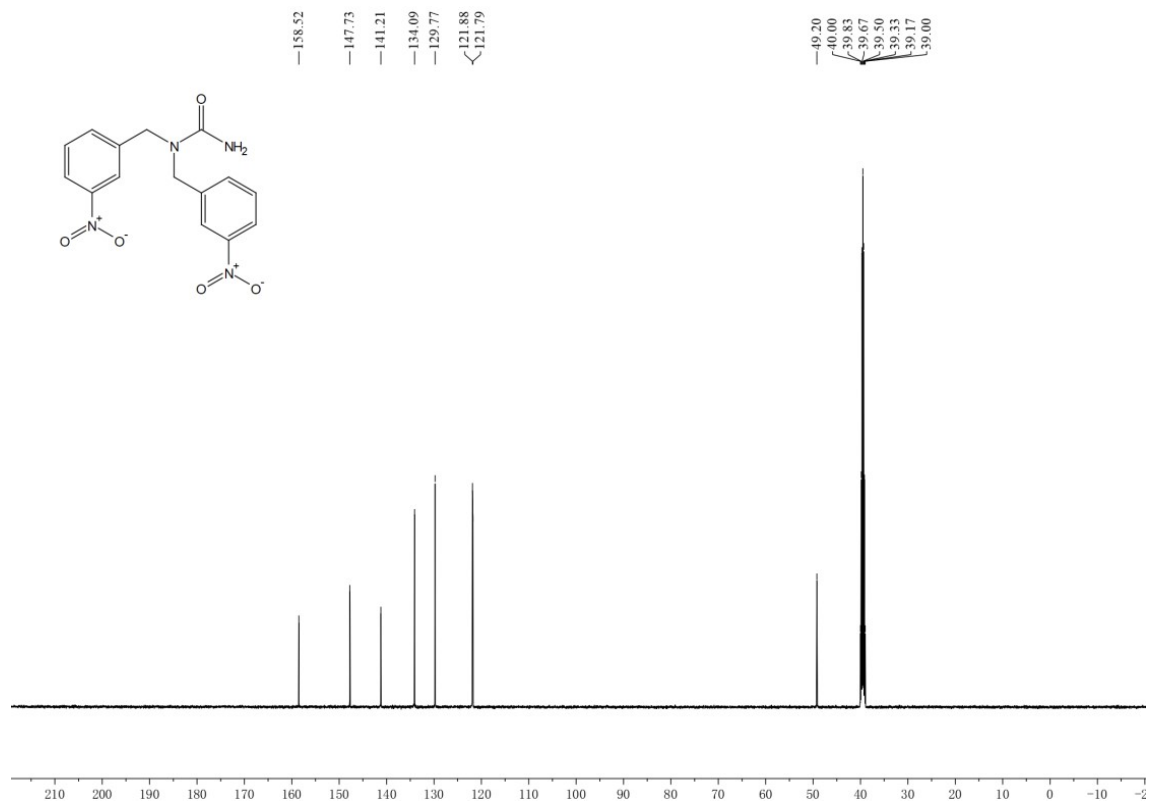

**4j**  $^1\text{H}$  NMR (500 MHz,  $\text{CDCl}_3$ )

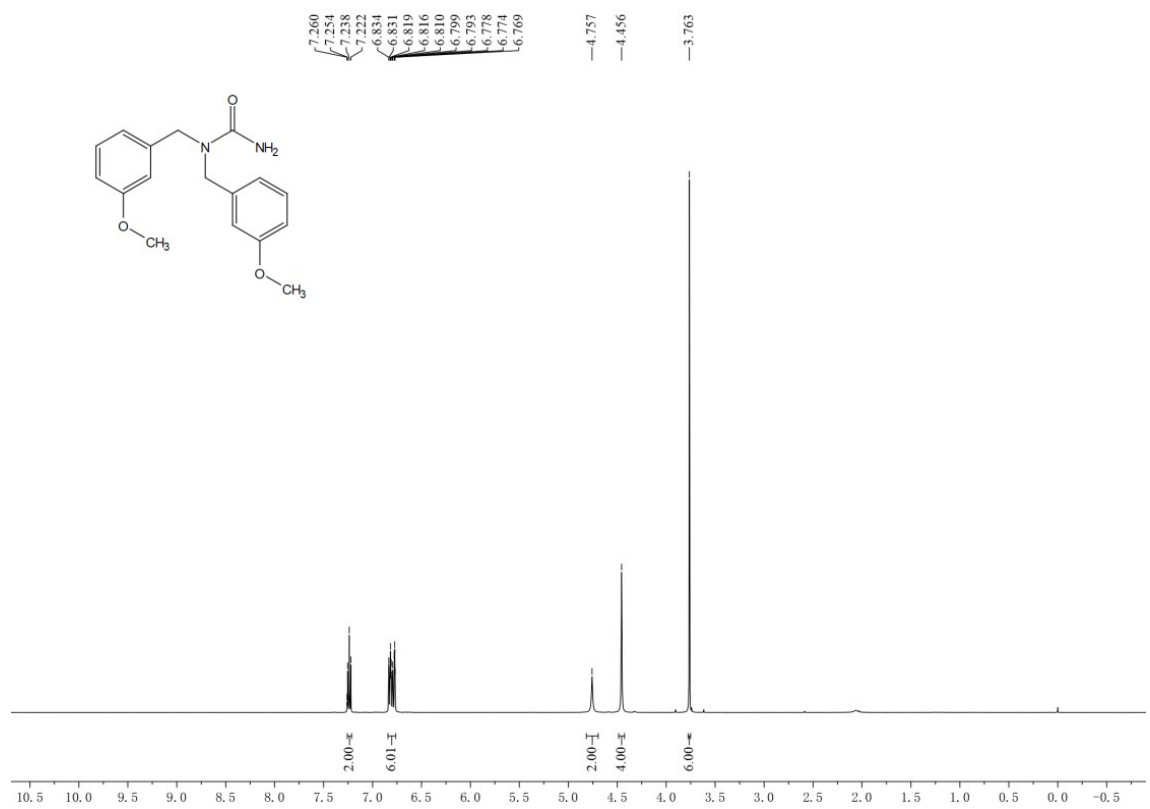

### 4j <sup>13</sup>C NMR (126 MHz, CDCl<sub>3</sub>)

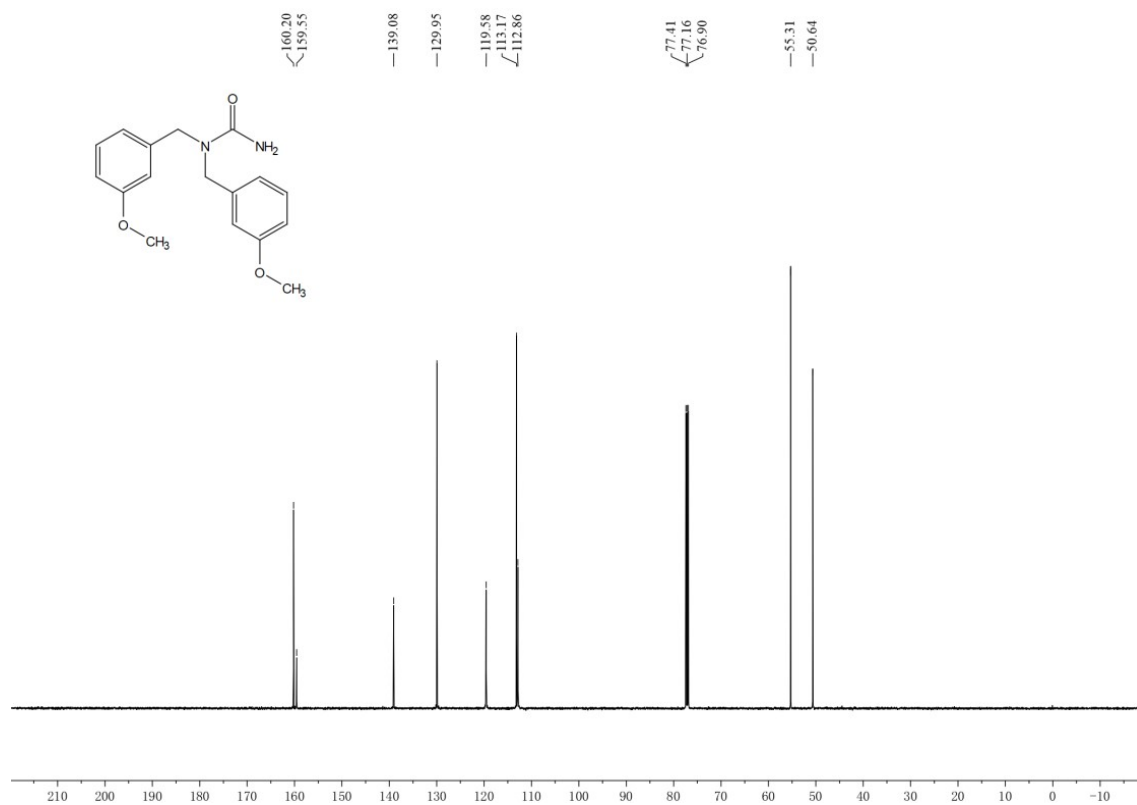

### 4k <sup>1</sup>H NMR (500 MHz, CDCl<sub>3</sub>)

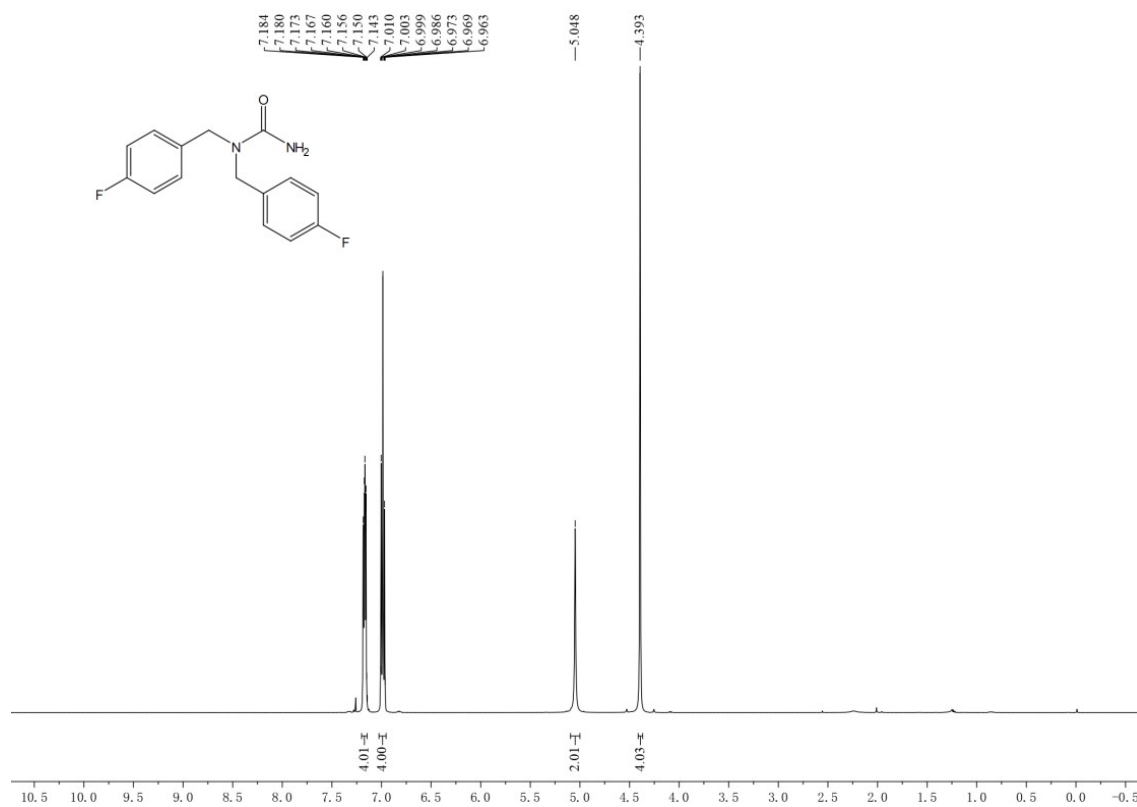

### 4k $^{13}\text{C}$ NMR (126 MHz, $\text{CDCl}_3$ )

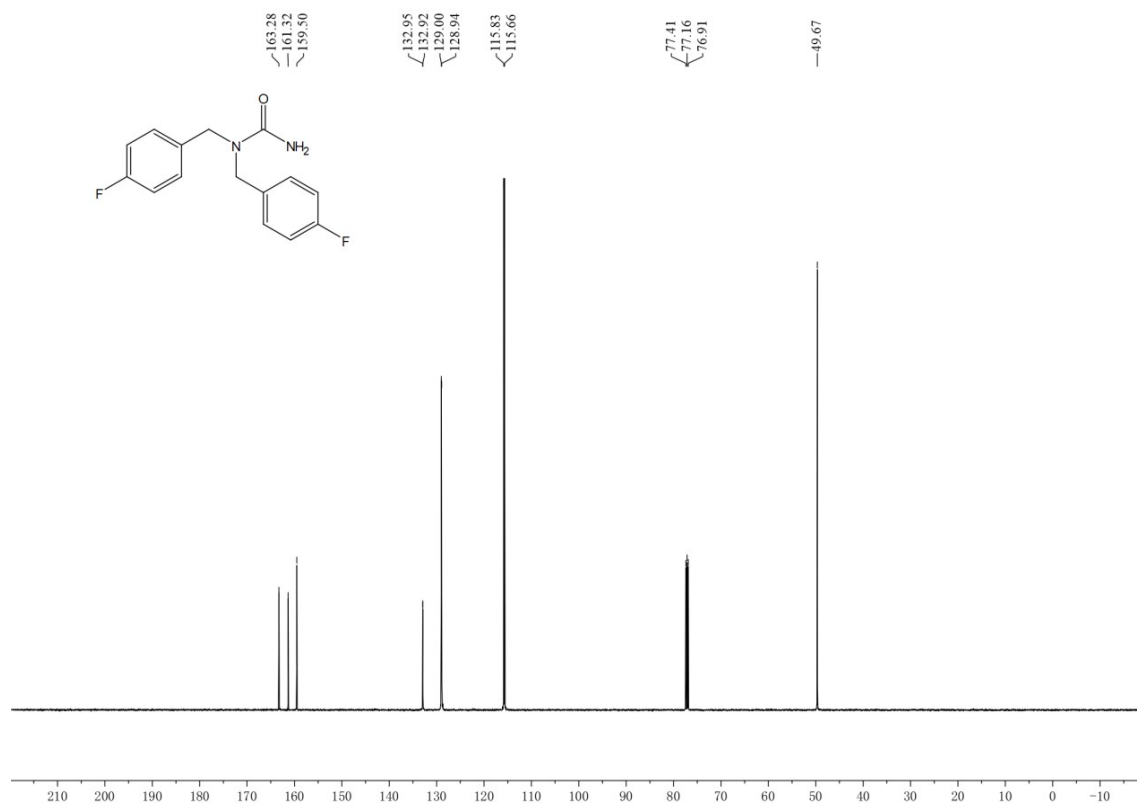

### 4k $^{19}\text{F}$ NMR (376 MHz, $\text{CDCl}_3$ )

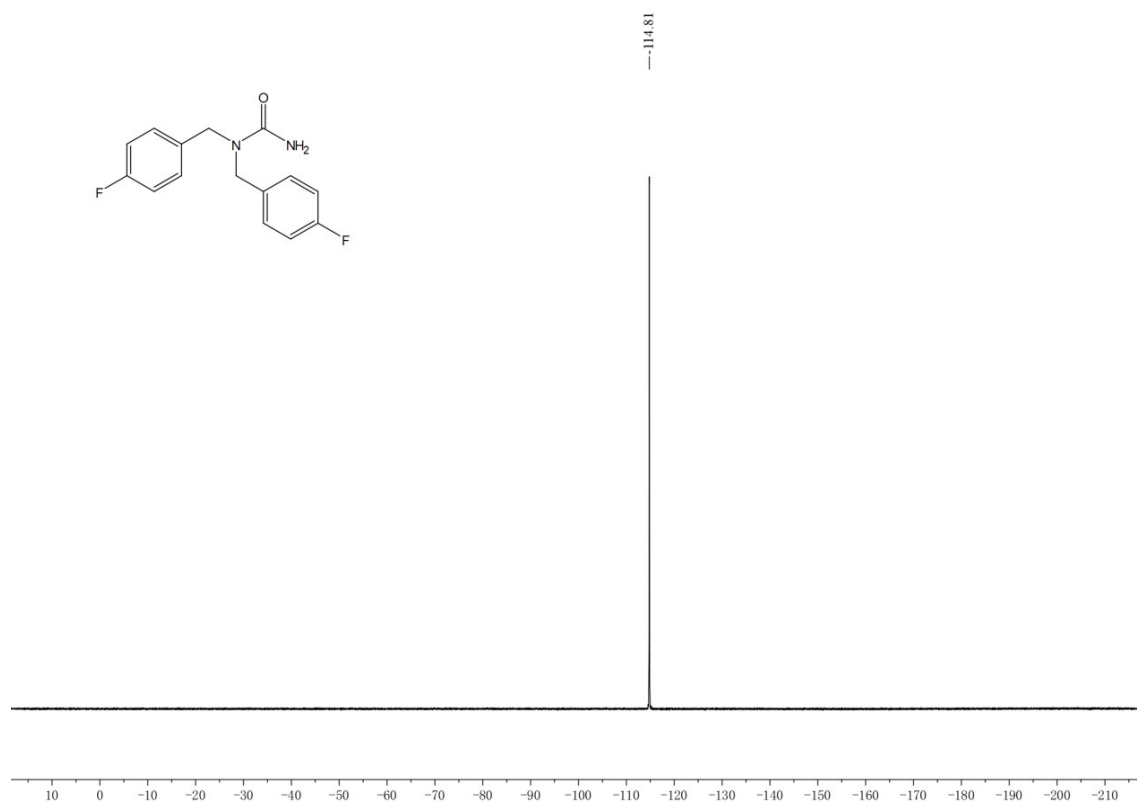

### 4l <sup>1</sup>H NMR (500 MHz, CDCl<sub>3</sub>)

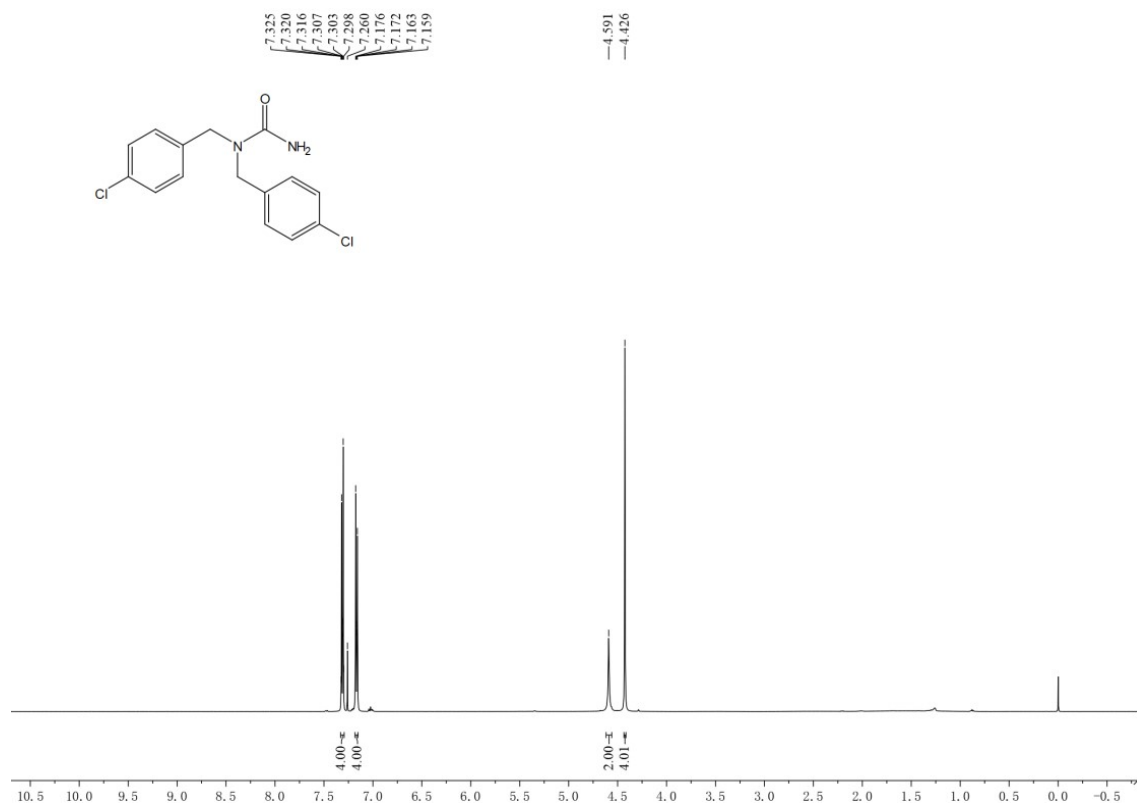

### 4l <sup>13</sup>C NMR (126 MHz, CDCl<sub>3</sub>)

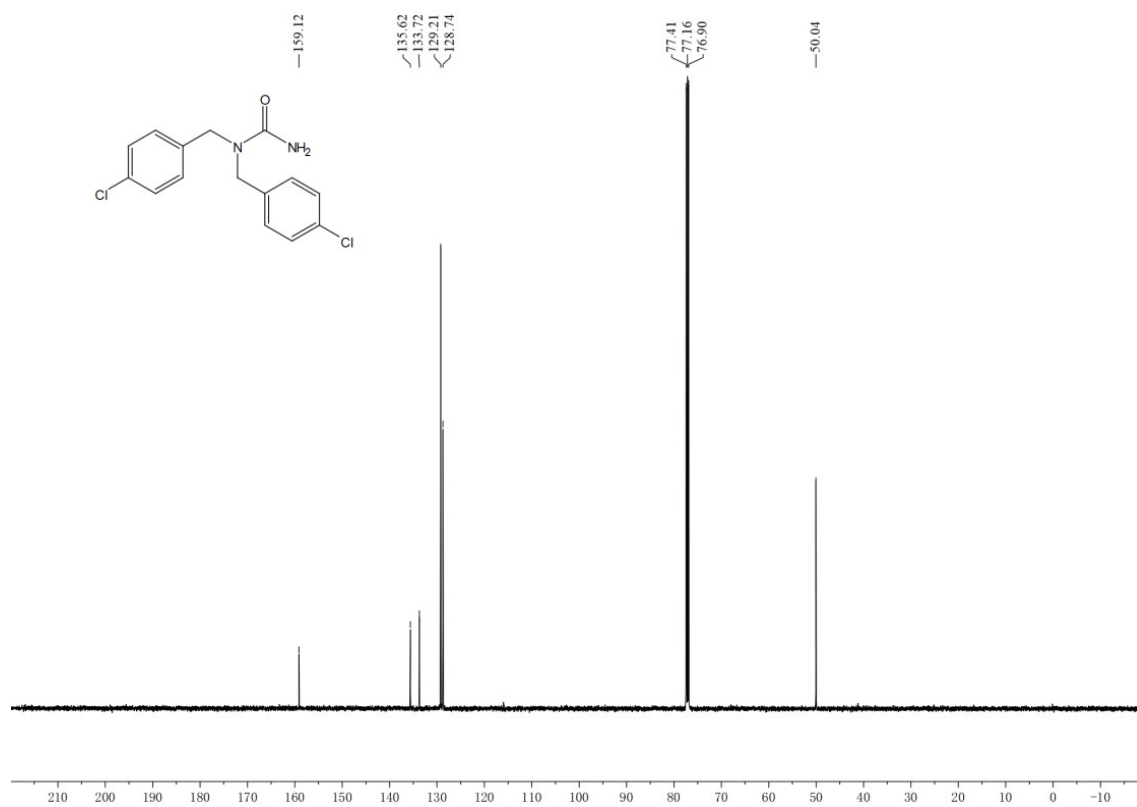

### 4m <sup>1</sup>H NMR (500 MHz, CDCl<sub>3</sub>)

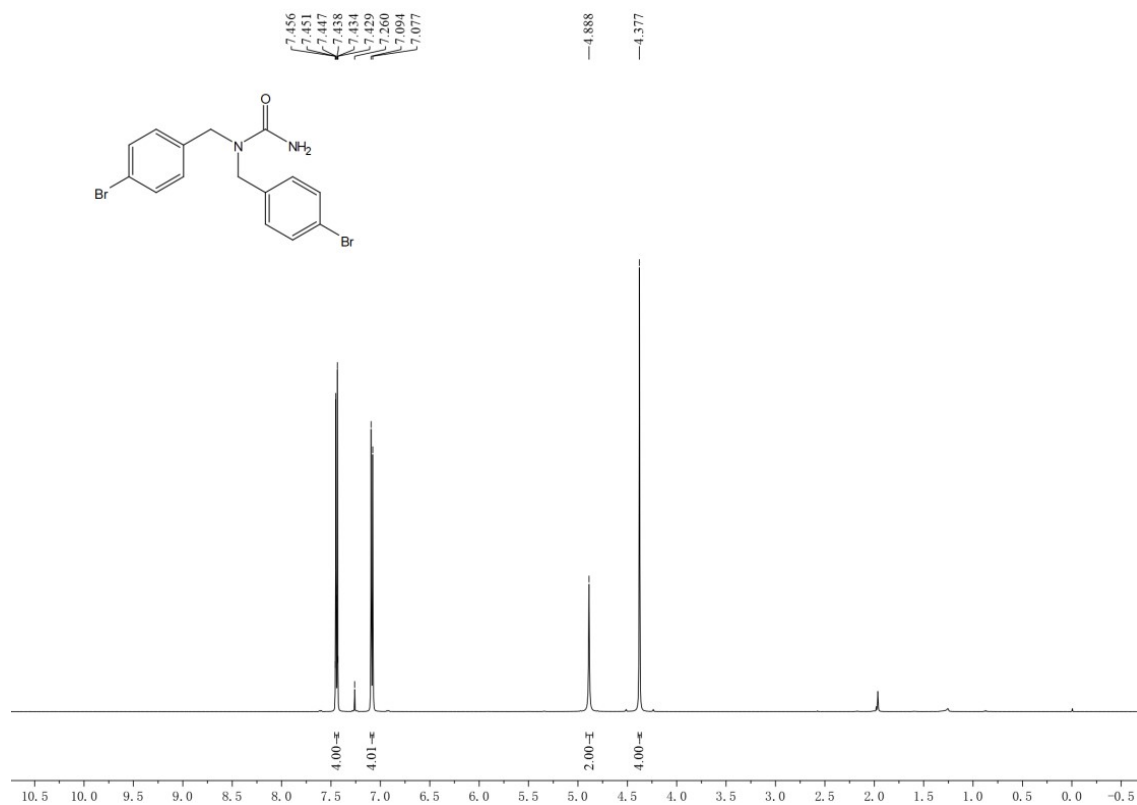

### 4m <sup>13</sup>C NMR (126 MHz, CDCl<sub>3</sub>)

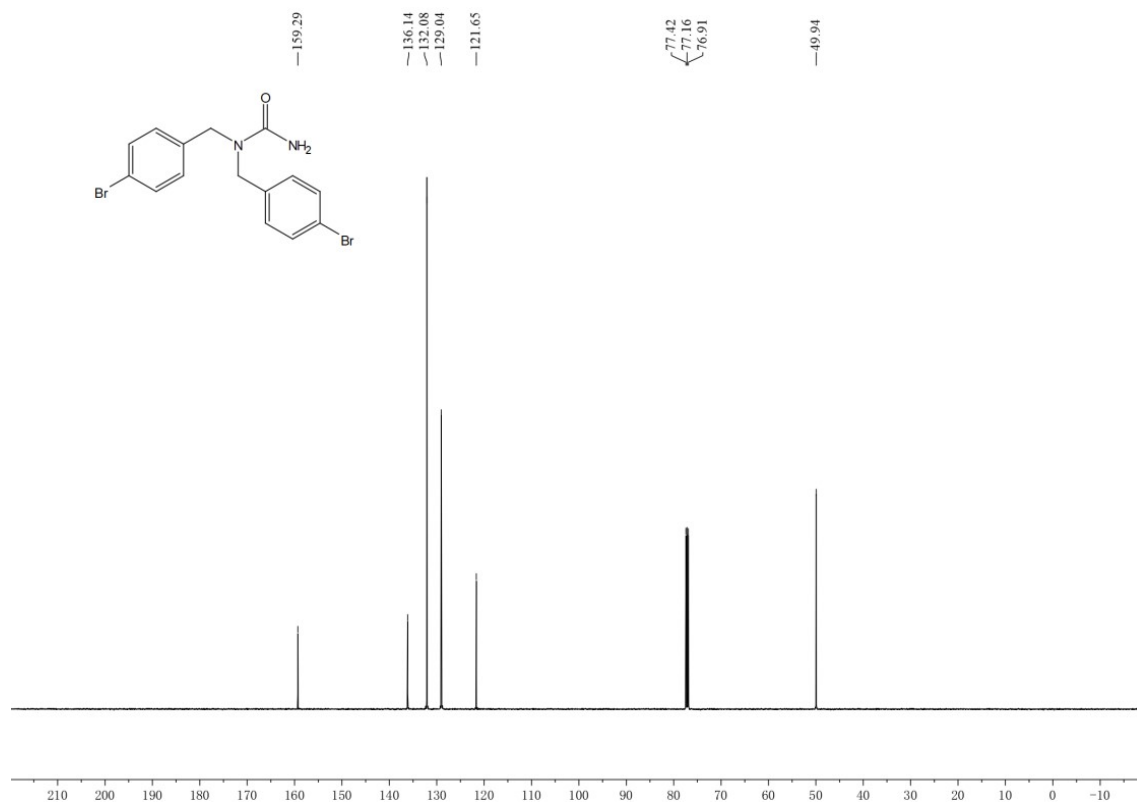



### 4n <sup>1</sup>H NMR (500 MHz, CDCl<sub>3</sub>)

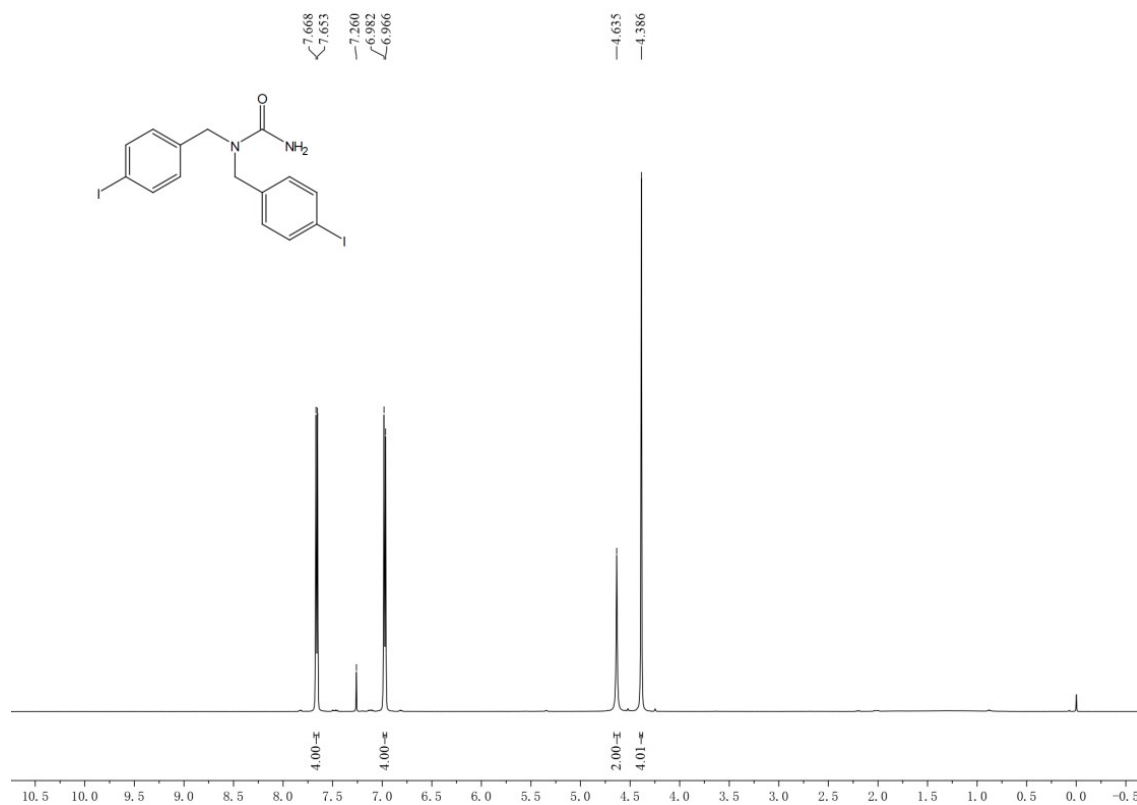

### 4n <sup>13</sup>C NMR (126 MHz, CDCl<sub>3</sub>)

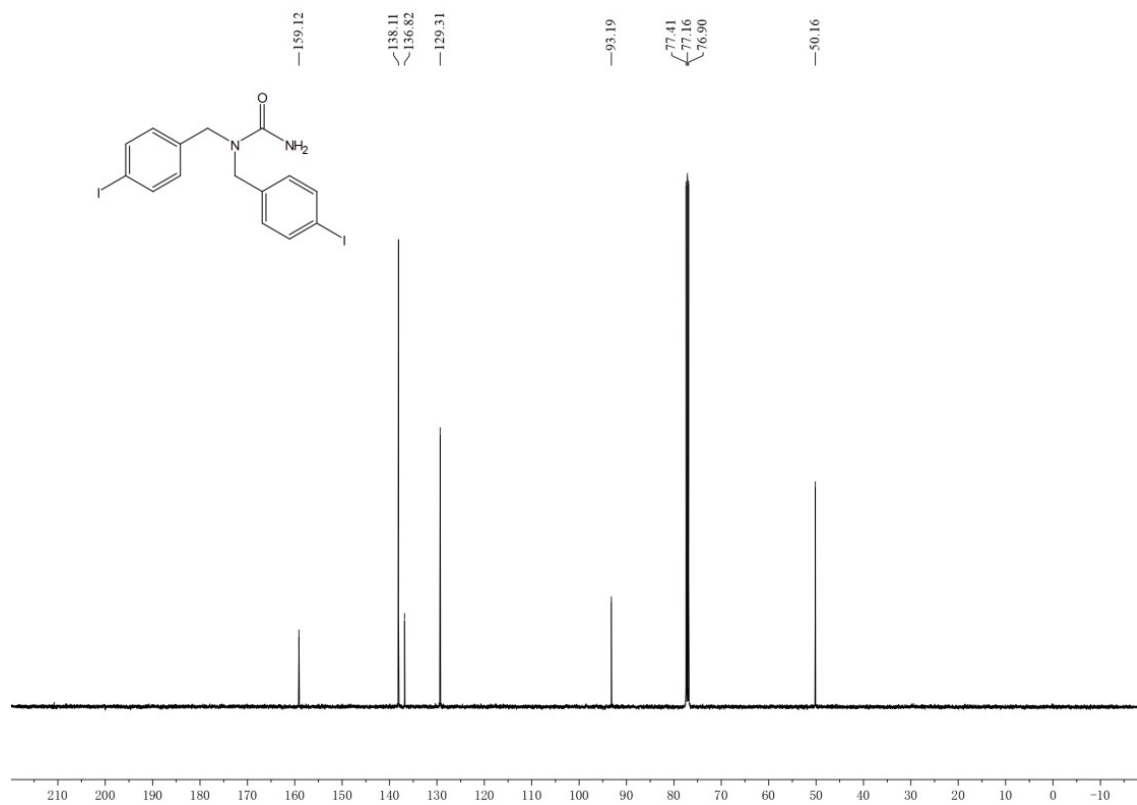

### 4o <sup>1</sup>H NMR (500 MHz, CDCl<sub>3</sub>)

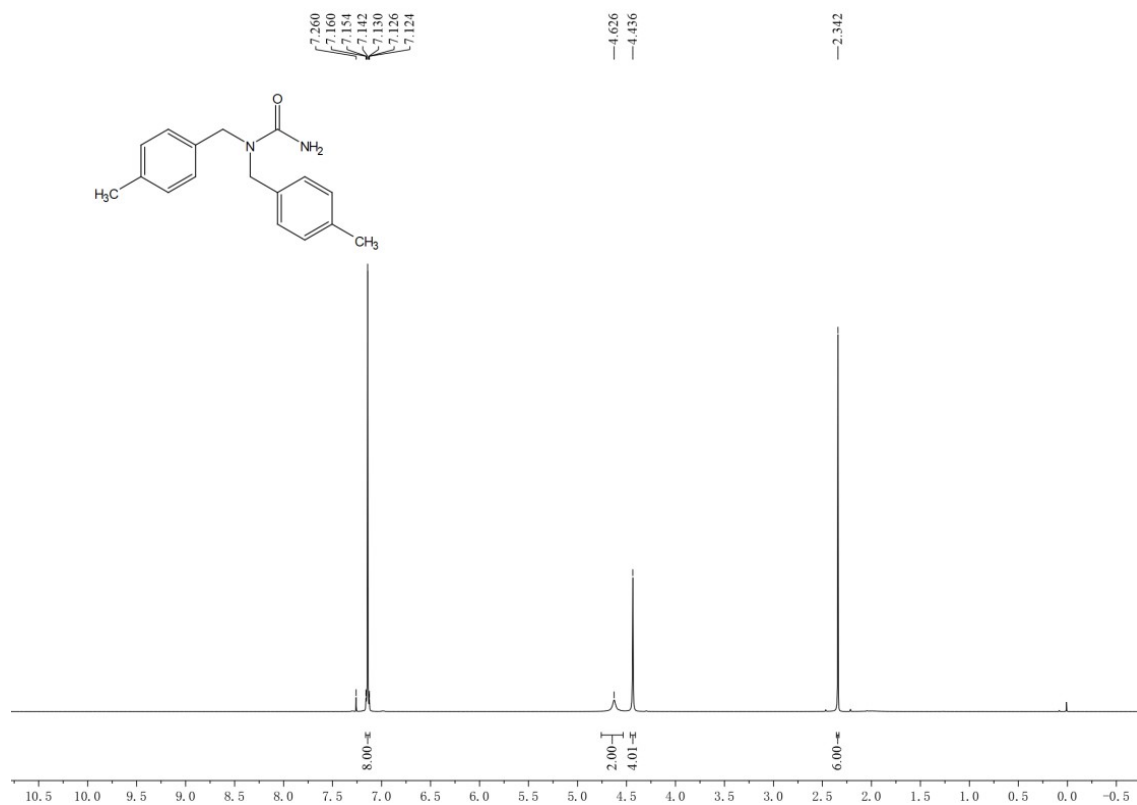

### 4o <sup>13</sup>C NMR (126 MHz, CDCl<sub>3</sub>)

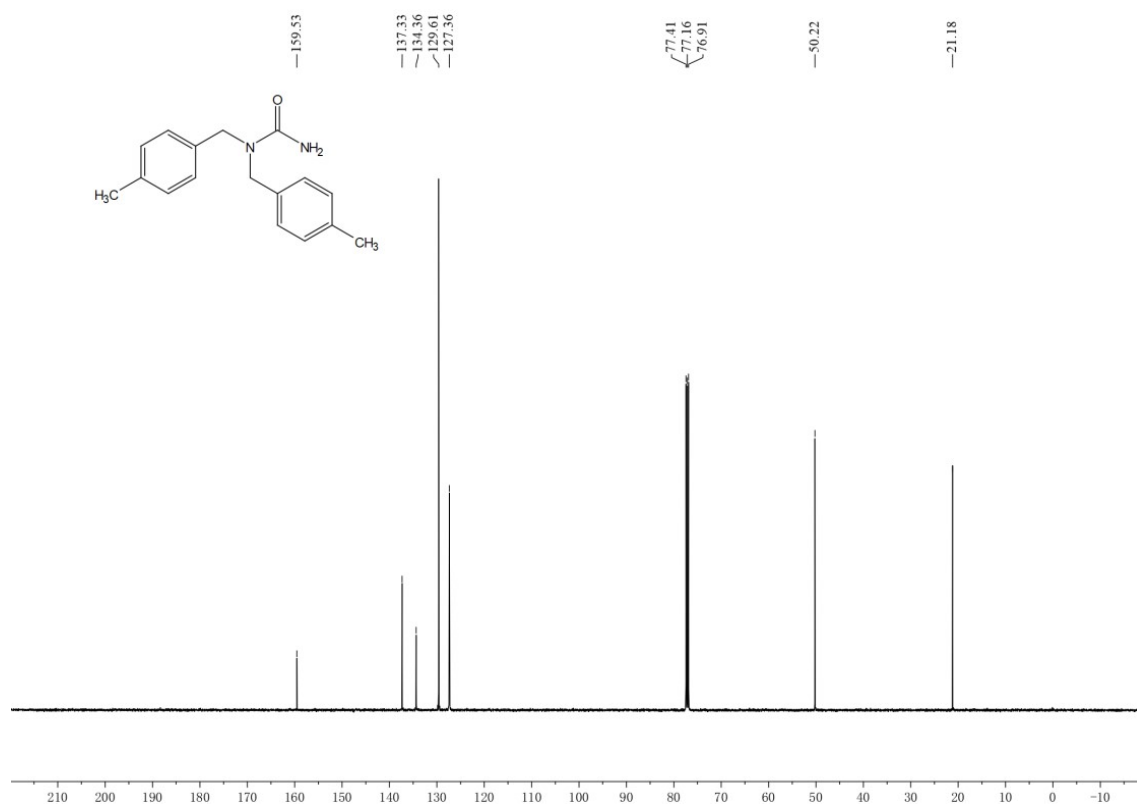

### 4p <sup>1</sup>H NMR (500 MHz, CDCl<sub>3</sub>)

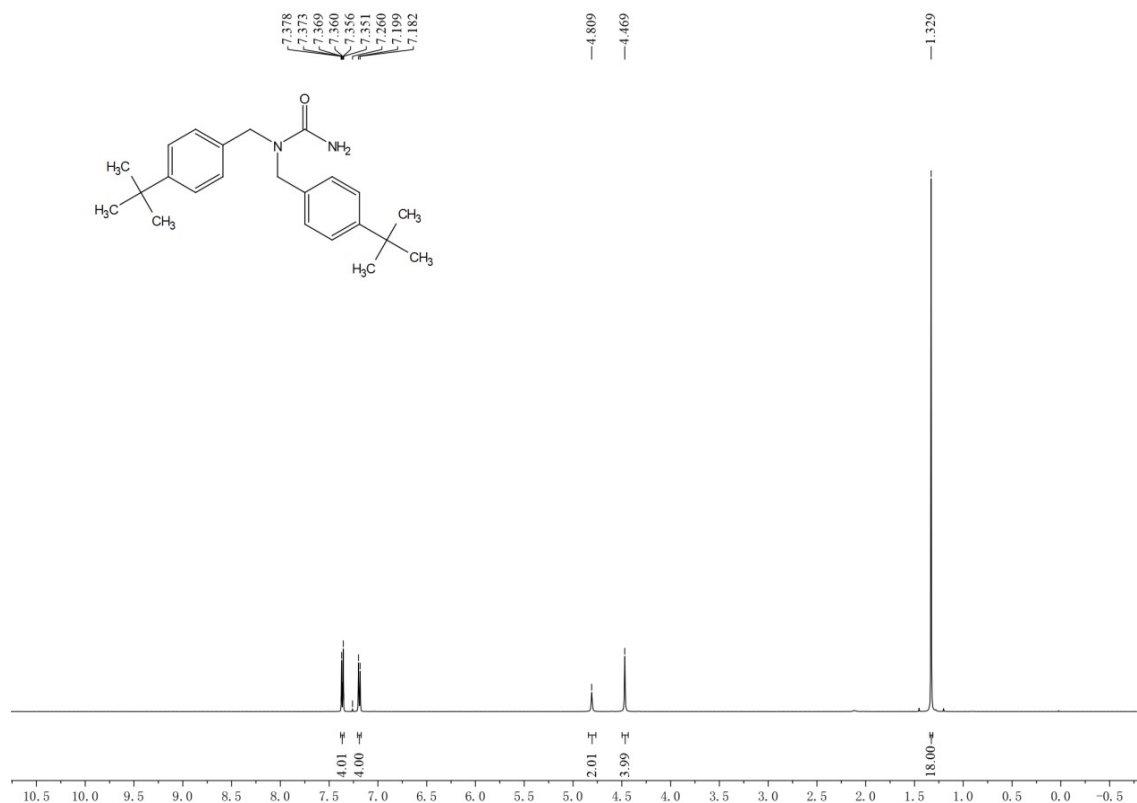

### 4p <sup>13</sup>C NMR (126 MHz, CDCl<sub>3</sub>)

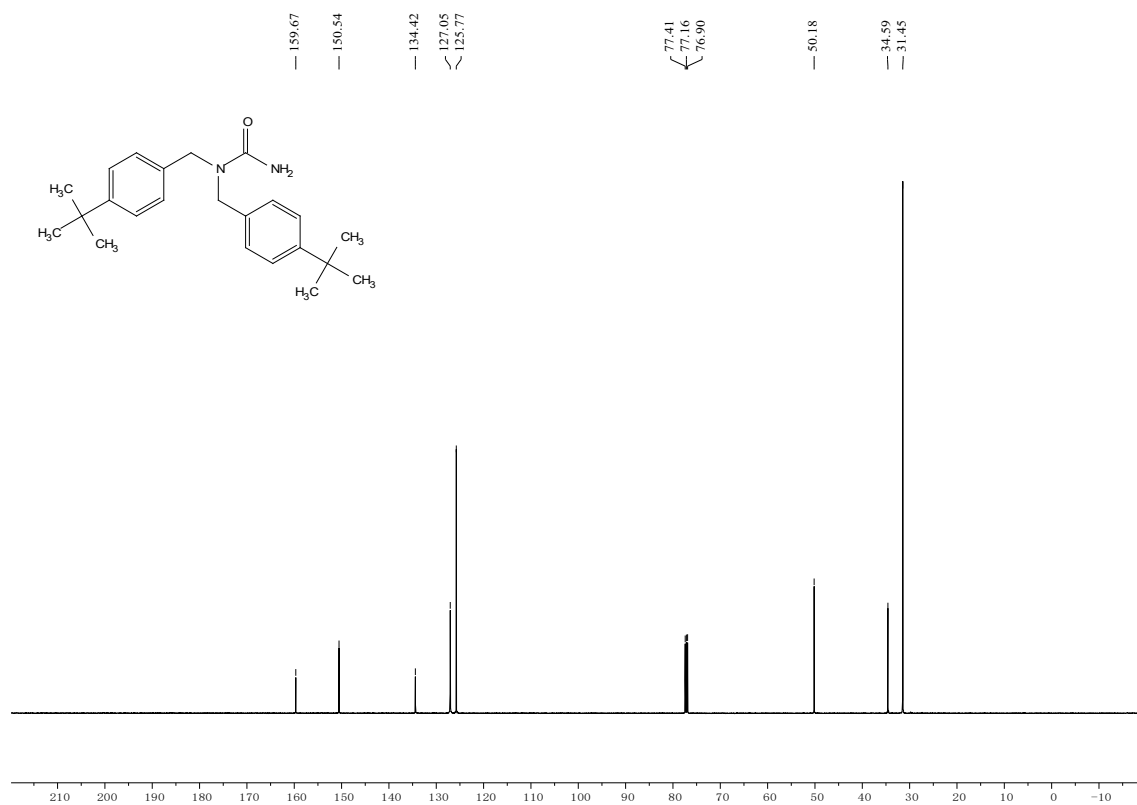

### 4q <sup>1</sup>H NMR (500 MHz, CDCl<sub>3</sub>)

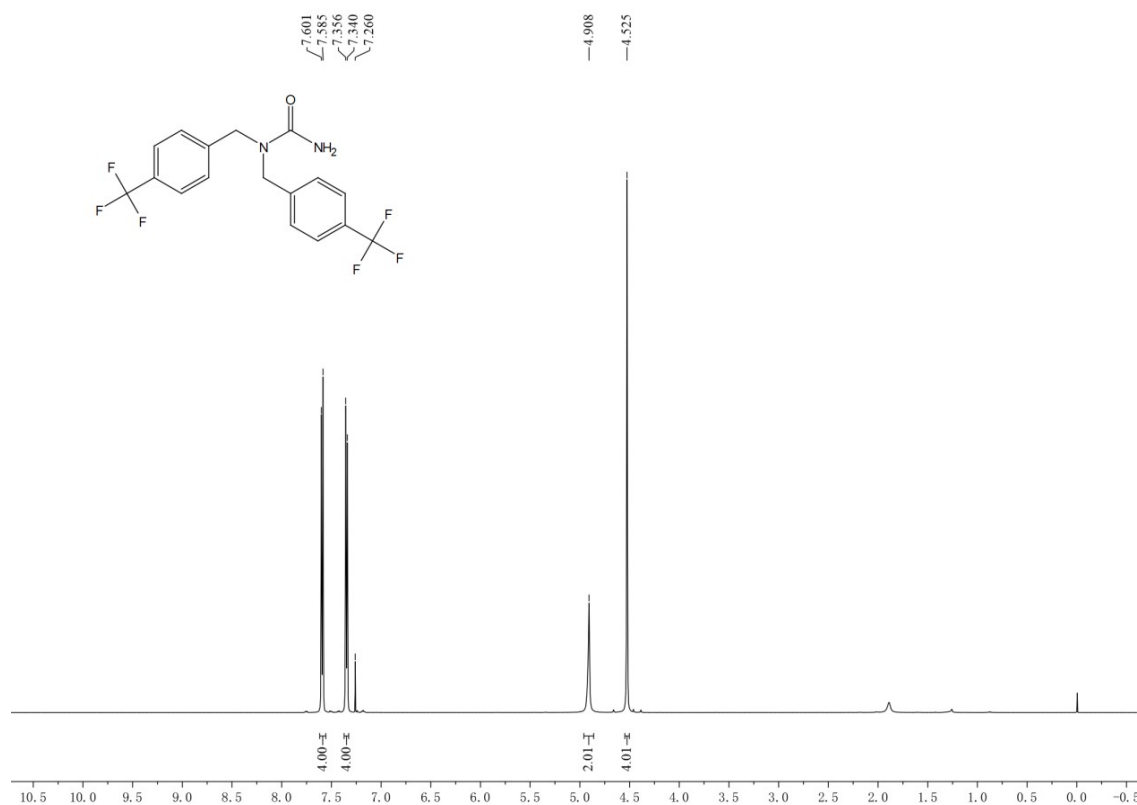

### 4q <sup>13</sup>C NMR (126 MHz, CDCl<sub>3</sub>)

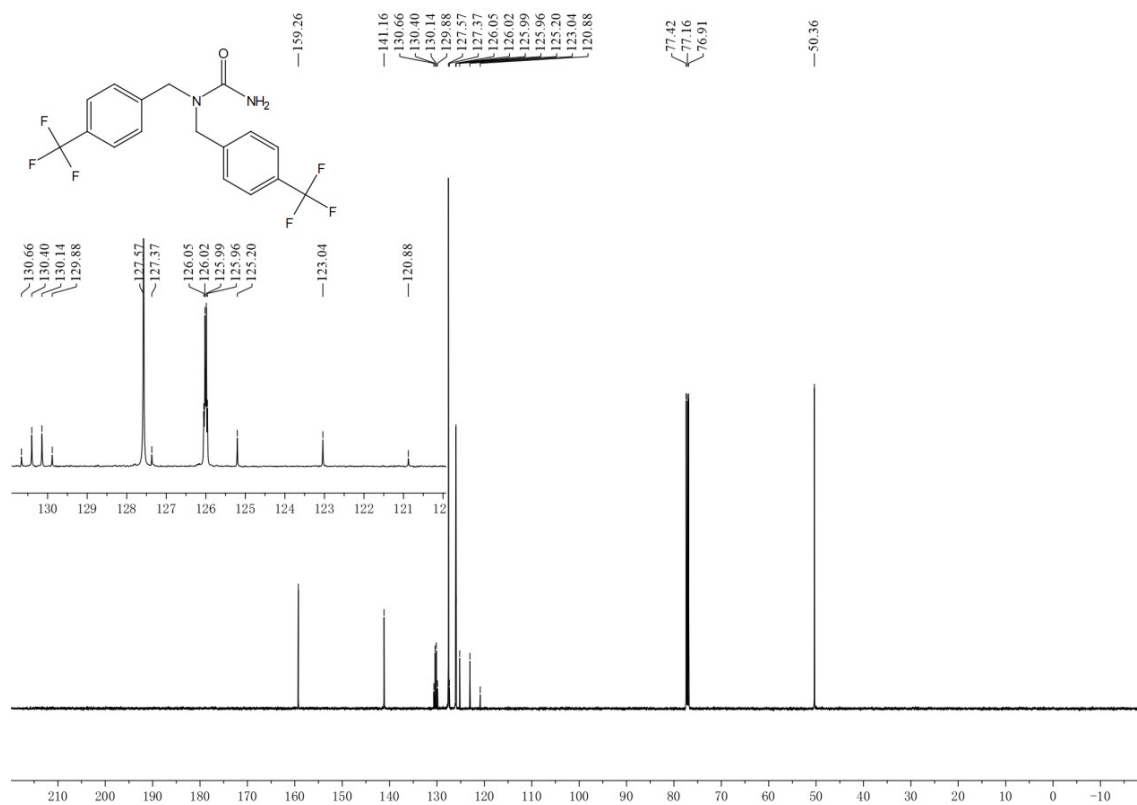

### 4q $^{19}\text{F}$ NMR (376 MHz, $\text{CDCl}_3$ )

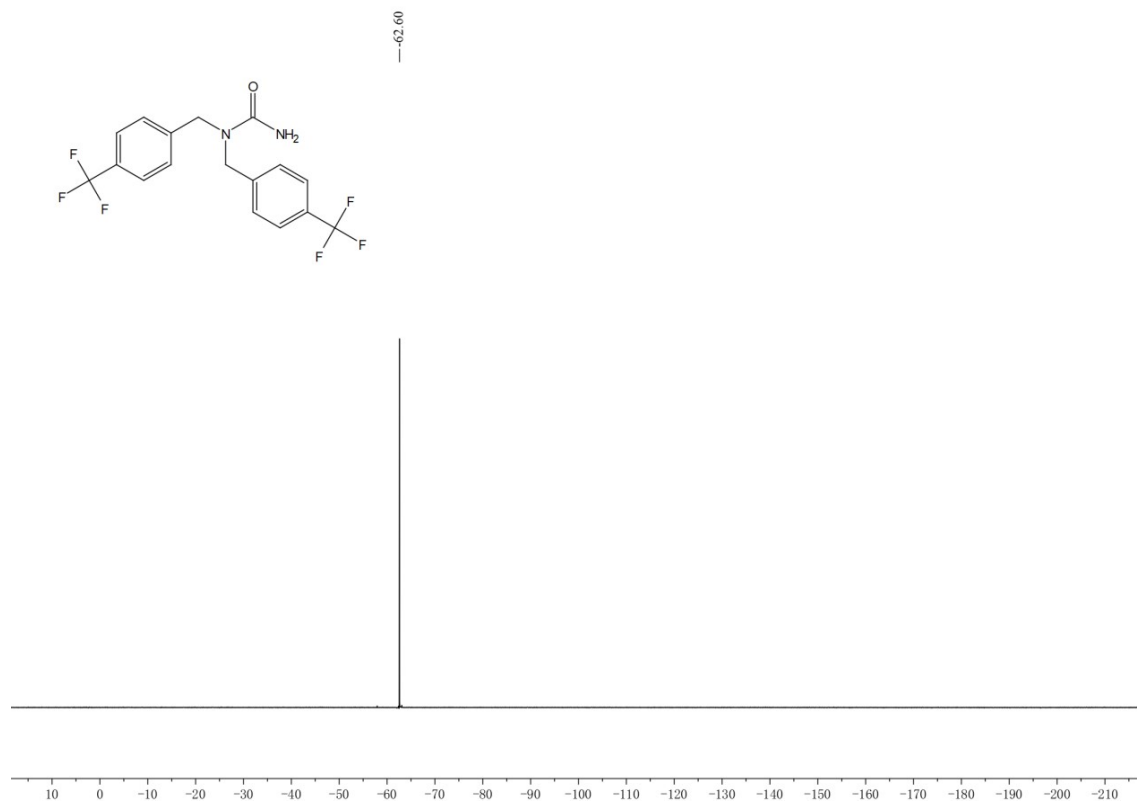

### 4r $^1\text{H}$ NMR (500 MHz, $\text{CDCl}_3$ )

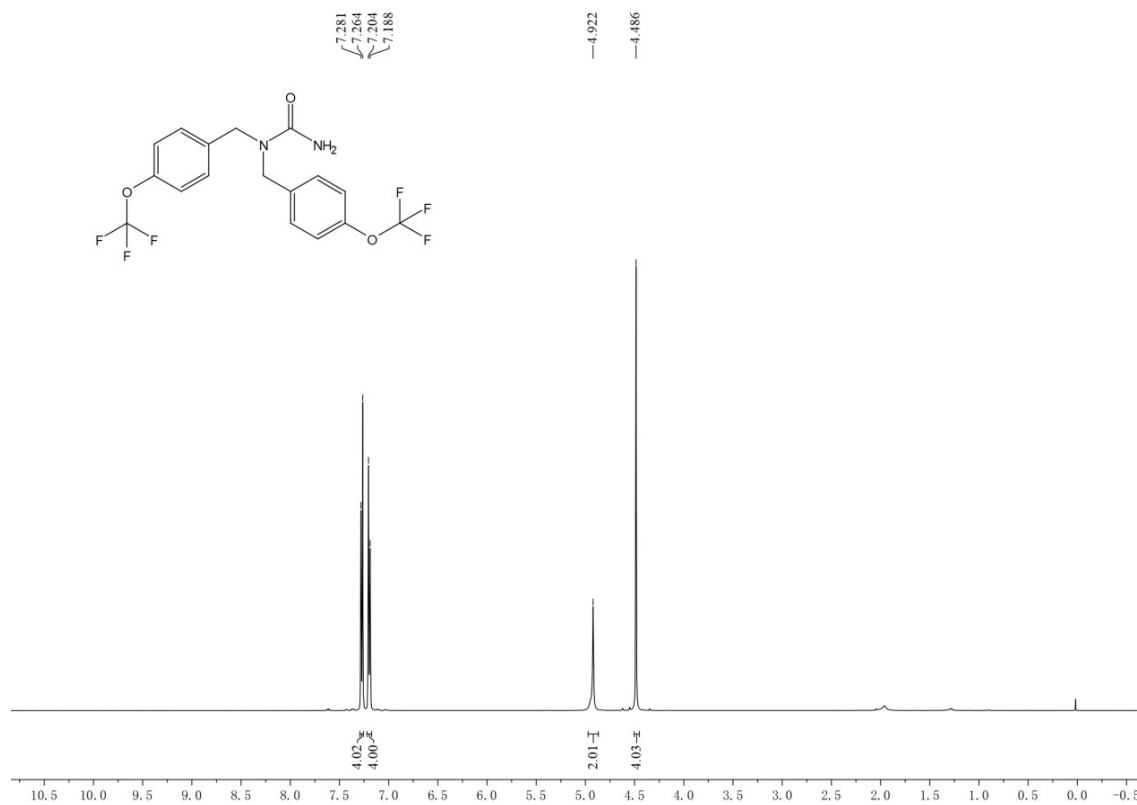

### 4r <sup>13</sup>C NMR (126 MHz, CDCl<sub>3</sub>)

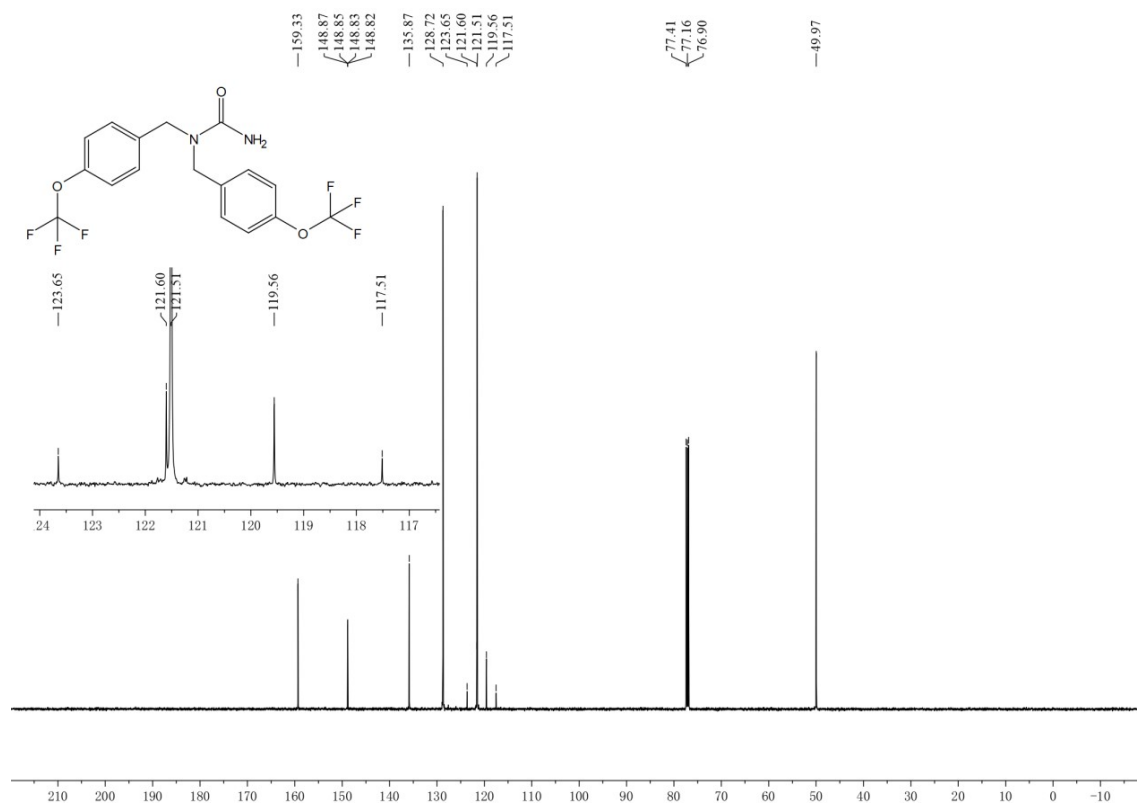

### 4r <sup>19</sup>F NMR (376 MHz, CDCl<sub>3</sub>)

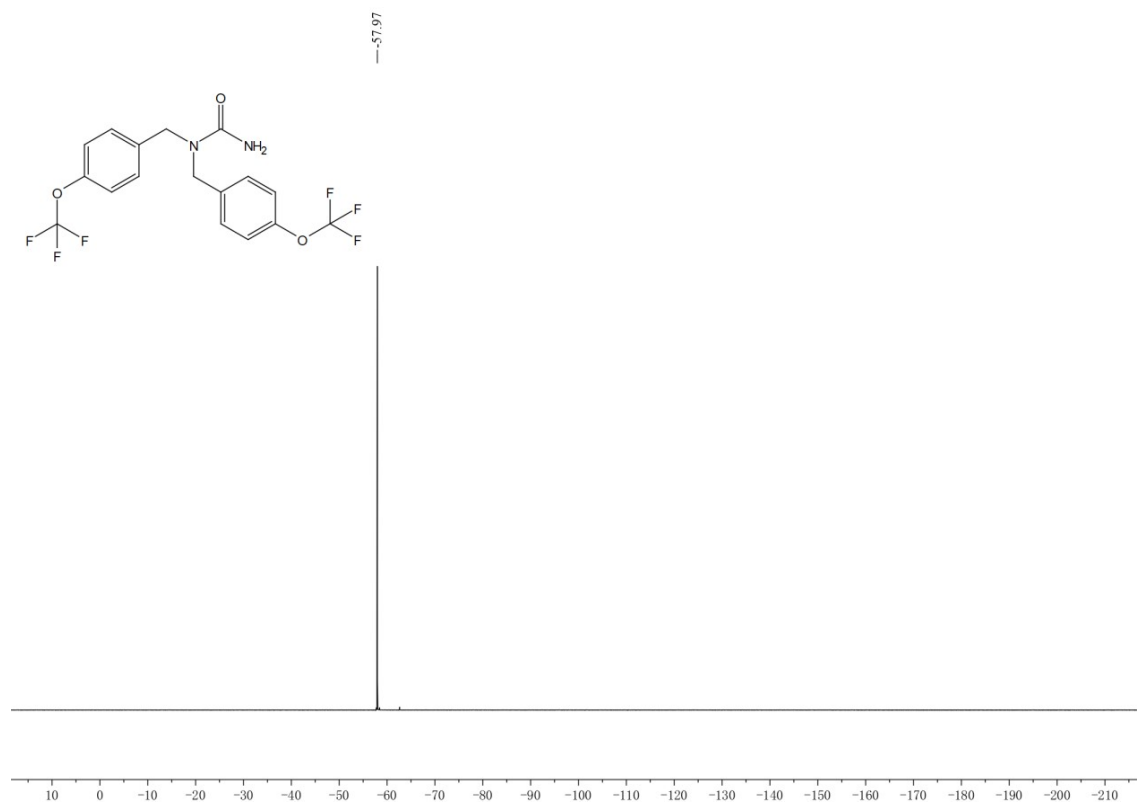

### 4s <sup>1</sup>H NMR (500 MHz, CDCl<sub>3</sub>)

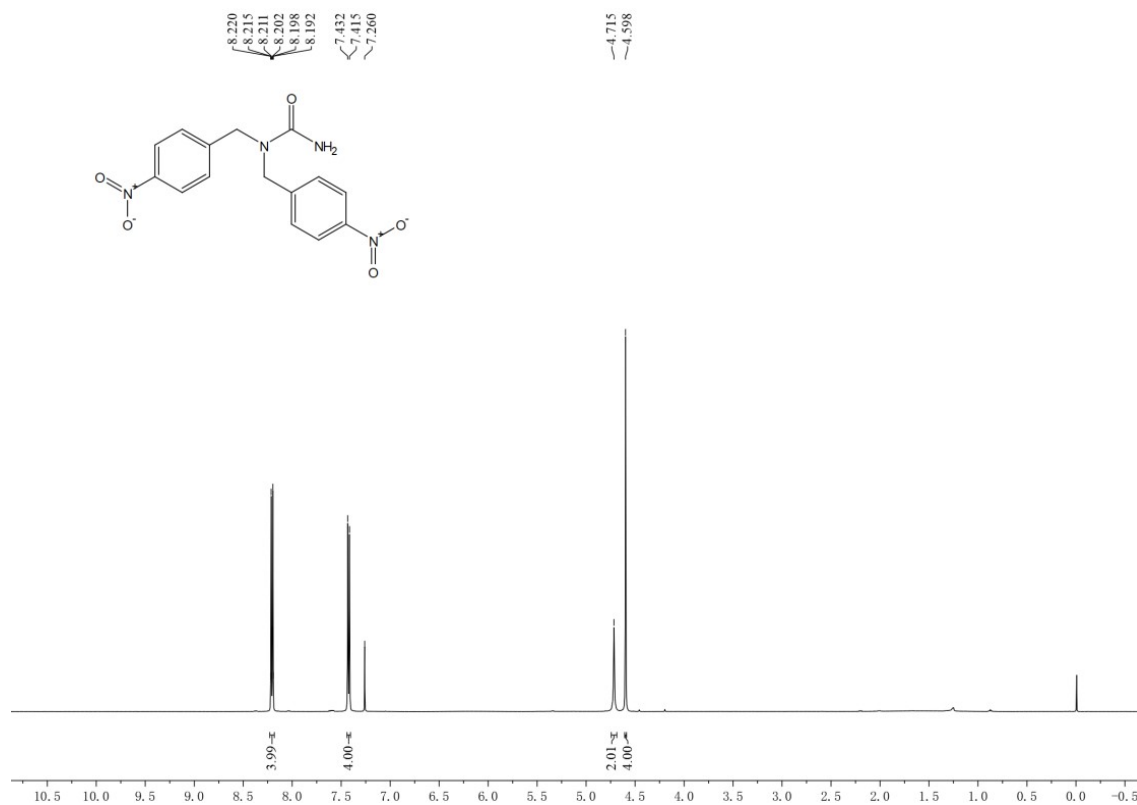

### 4s <sup>13</sup>C NMR (126 MHz, CDCl<sub>3</sub>)

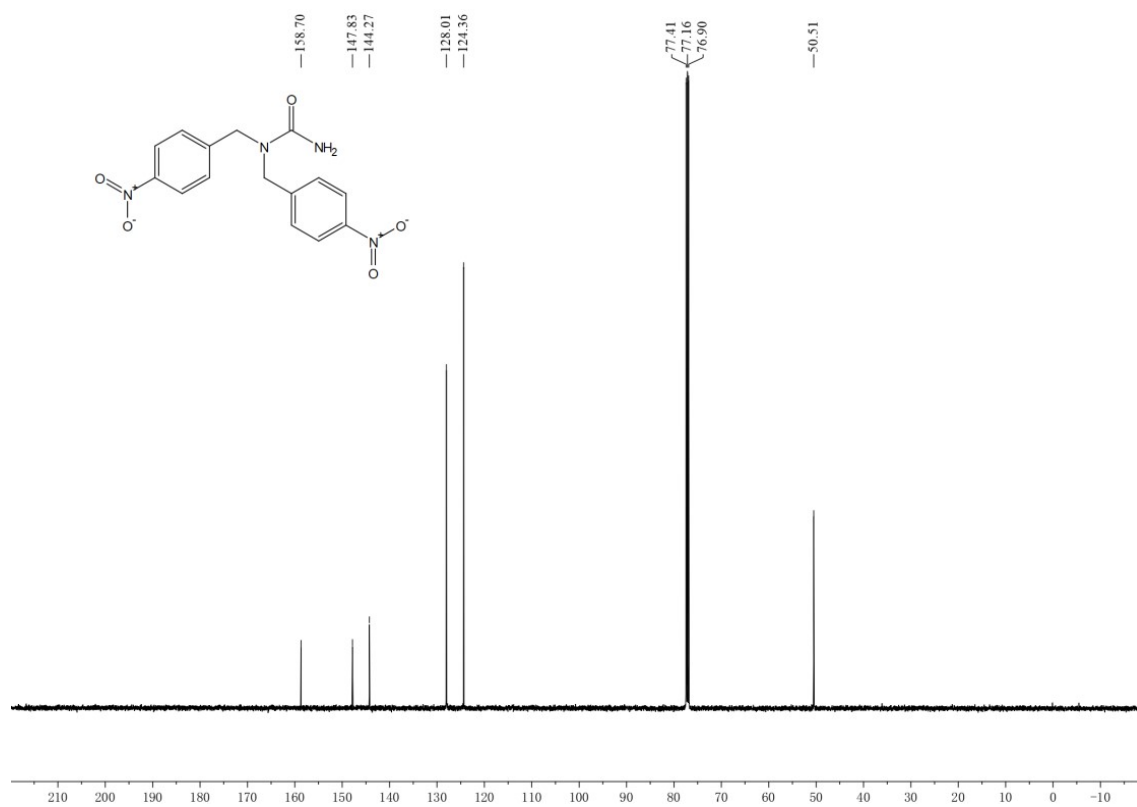

### 4t <sup>1</sup>H NMR (500 MHz, CDCl<sub>3</sub>)

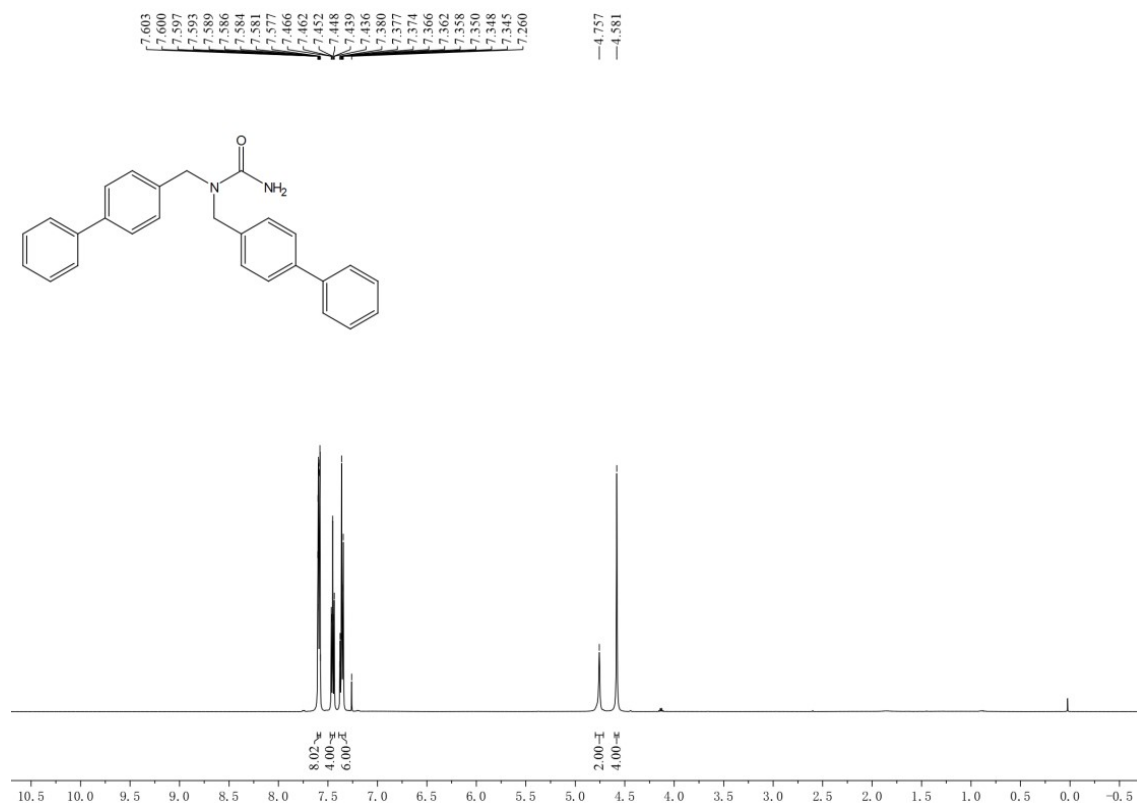

### 4t <sup>13</sup>C NMR (126 MHz, CDCl<sub>3</sub>)

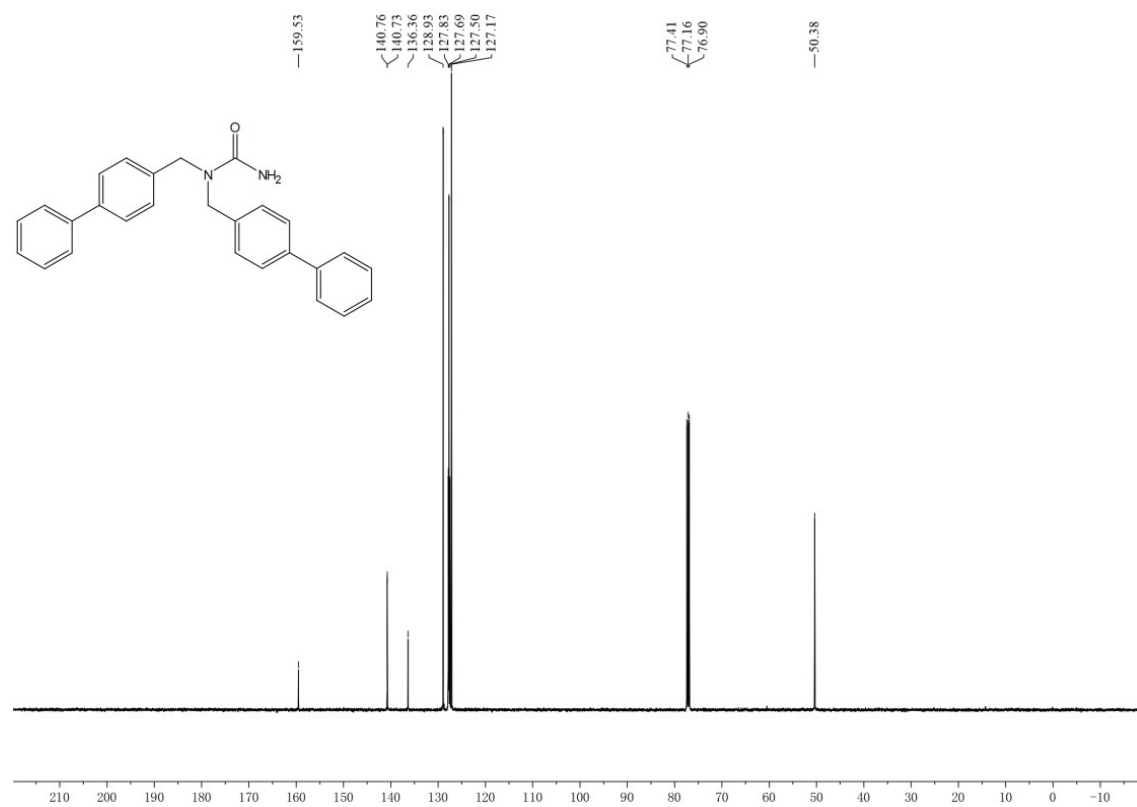



### 5a <sup>1</sup>H NMR (500 MHz, DMSO - d<sub>6</sub>)

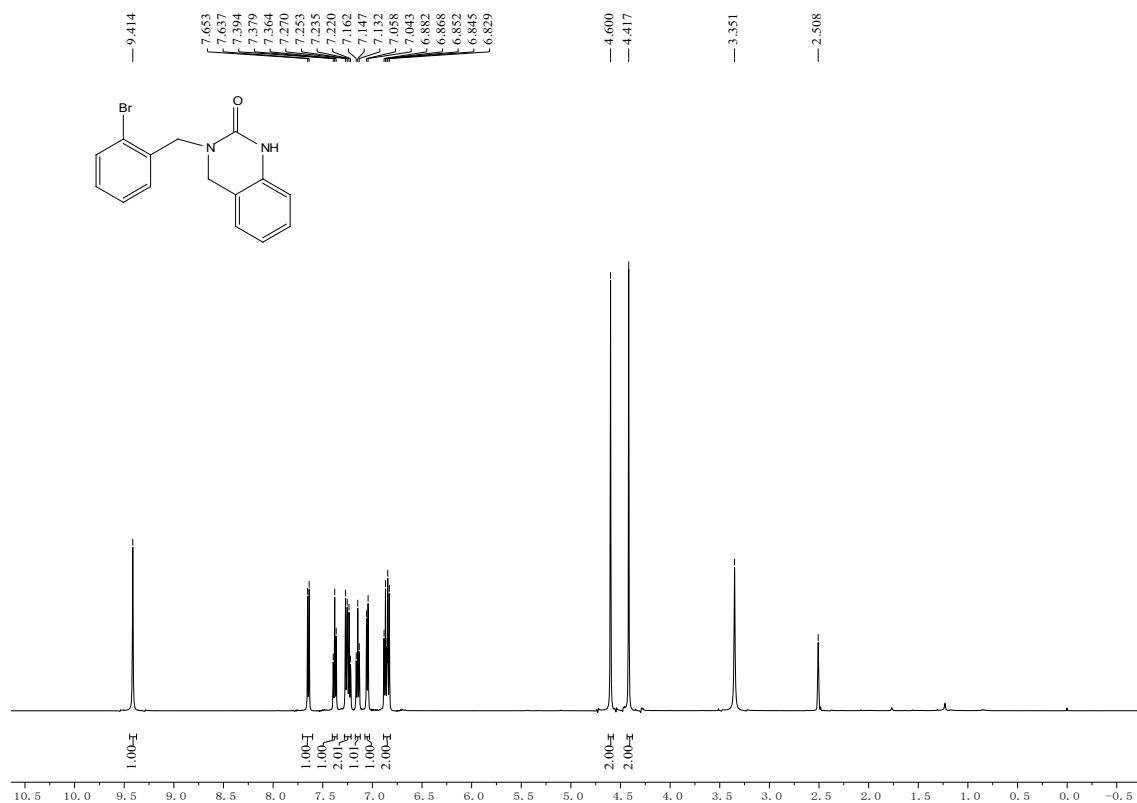

### 5a <sup>13</sup>C NMR (126 MHz, DMSO - d<sub>6</sub>)

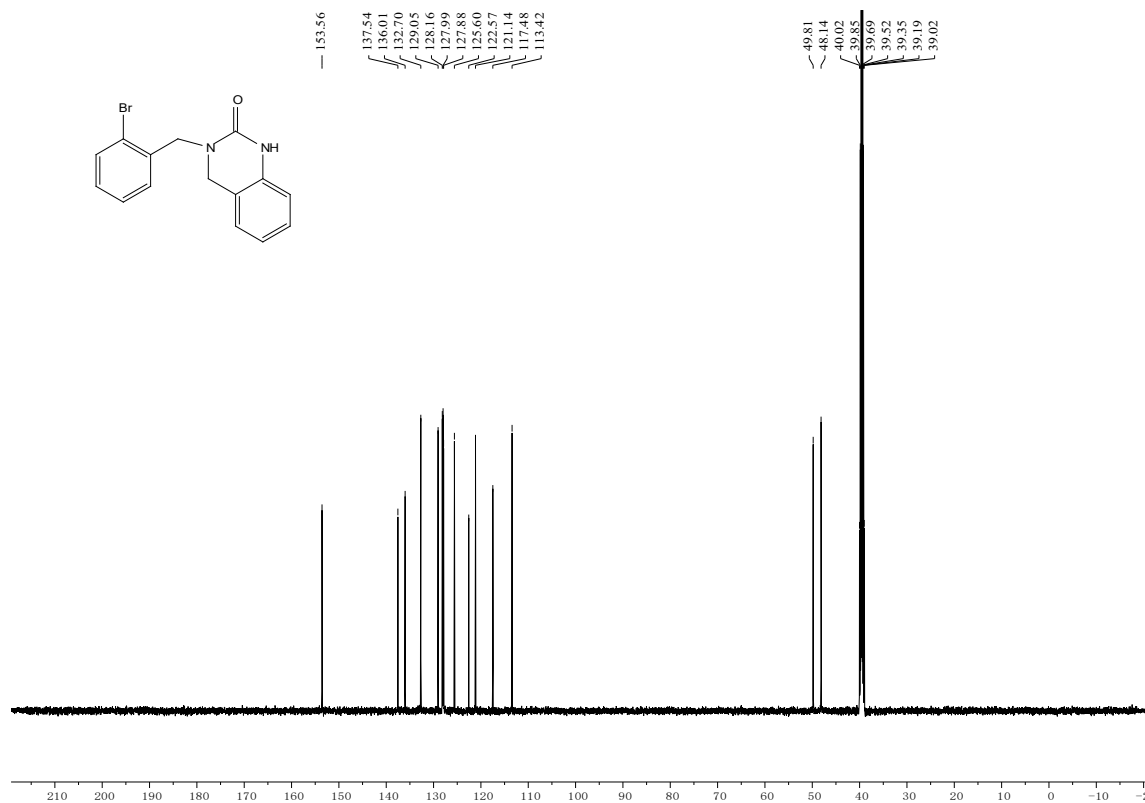

## 5a HRMS spectra

1 #23 RT: 0.24 AV: 1 SB: 4 0.02-0.10 NL: 8.10E8  
T: FTMS + c APCI corona Full ms [50.0000-750.0000]

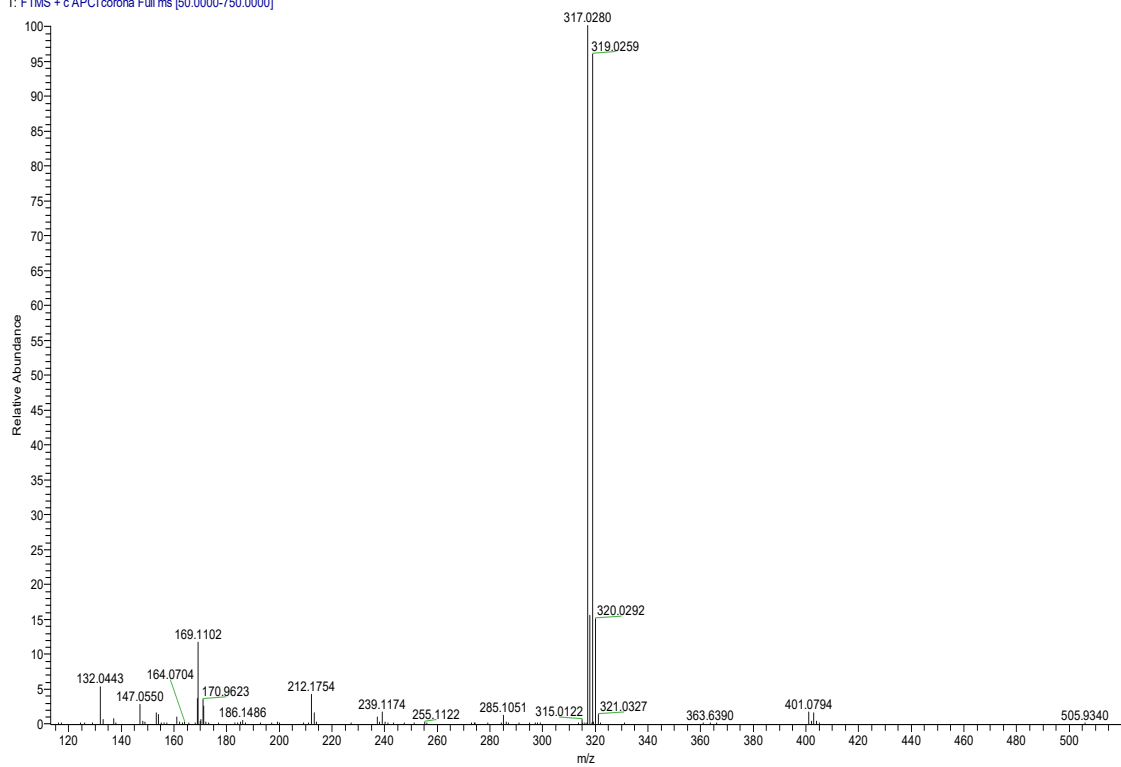

Supplement: d4ra04286g1.pdf [file d4ra04286g1.pdf]
